# 1 Mapping the S1 and S1' subsites of cysteine proteases 2 with new dipeptidyl nitrile inhibitors as trypanocidal agents

3 Lorenzo Cianni<sup>1,2,3,5</sup>, Carina Lemke<sup>2</sup>, Erik Gilberg<sup>2,3</sup>, Christian Feldmann<sup>3</sup>, Fabiana  
4 Rosini<sup>1</sup>, Fernanda dos Reis Rocho<sup>1</sup>, Jean F.R. Ribeiro<sup>1</sup>, Daiane Y. Tezuka<sup>1,4</sup>, Carla  
5 D. Lopes<sup>6</sup>, Sérgio de Albuquerque<sup>6</sup>, Jürgen Bajorath<sup>3</sup>, Stefan Laufer<sup>5</sup>, Andrei Leitão<sup>1</sup>,  
6 Michael Gütschow<sup>2\*</sup>, Carlos A. Montanari<sup>1\*</sup>

7 <sup>1</sup>Medicinal Chemistry Group, Institute of Chemistry of São Carlos, University of São  
8 Paulo, Avenue Trabalhador Sancarlene, 400, 23566-590, São Carlos/SP, Brazil

9 <sup>2</sup>Pharmaceutical Institute, Pharmaceutical Chemistry I, University of Bonn, An der  
10 Immenburg 4, D-53121 Bonn, Germany

11 <sup>3</sup>Department of Life Science Informatics, B-IT, LIMES Program Unit Chemical  
12 Biology and Medicinal Chemistry, Rheinische Friedrich-Wilhelms-Universität,  
13 Endenicher Allee 19c, D-53115 Bonn, Germany

14 <sup>4</sup>Ribeirão Preto School of Pharmaceutical Sciences, University of São Paulo,  
15 Ribeirão Preto, São Paulo, Brazil

16 <sup>5</sup>Department of Pharmaceutical/Medicinal Chemistry, Eberhard Karls University  
17 Tübingen, Auf der Morgenstelle 8, 72076 Tübingen, Germany

18 <sup>6</sup>Department of Clinical Toxicological and Bromatological Analysis School of  
19 Pharmaceutical Sciences of Ribeirão Preto, University of São Paulo (USP), Ribeirão  
20 Preto-SP, Brazil

21 \*corresponding authors

22 Email: [guetschow@uni-bonn.de](mailto:guetschow@uni-bonn.de) (MG); [carlos.montanari@usp.br](mailto:carlos.montanari@usp.br) (CAM)

23

## 24 **Abstract**

25

26 The cysteine protease cruzipain is considered to be a validated target for therapeutic  
27 intervention in the treatment of Chagas disease. A series of 26 new compounds  
28 was designed, synthesized, and tested against the recombinant cruzain (Cz) to  
29 map its S1/S1' subsites. The same series was evaluated on a panel of four human  
30 cysteine proteases (CatB, CatK, CatL, CatS) and *Leishmania mexicana* CPB, which  
31 is a potential target for the treatment of cutaneous leishmaniasis. The synthesized  
32 compounds are dipeptidyl nitriles designed based on the most promising  
33 combinations of different moieties in P1 (ten), P2 (six), and P3 (four different building  
34 blocks). Eight compounds exhibited a  $K_i$  smaller than 20.0 nM for Cz, whereas three  
35 compounds met these criteria for LmCPB. The three inhibitors had an  $EC_{50}$  value of  
36 ca. 4  $\mu$ M, thus being equipotent to benznidazole according to the anti-trypanosomal  
37 effects. Our mapping approach and the respective structure-activity relationships  
38 provide insights into the specific ligand-target interactions for therapeutically relevant  
39 cysteine proteases.

40

## 41 **Author Summary**

42

43 Despite many achievements in identifying novel agents for the treatment of tropical  
44 and neglected diseases, further research continues to be of fundamental importance.  
45 Our research groups have been using the cruzipain cysteine protease in its  
46 recombinant form, cruzain (Cz), to identify new trypanocidal agents. Considering the  
47 possible interchangeability with other cysteine proteases, the same series of  
48 dipeptidyl nitriles was tested in *Leishmania mexicana* LmCPB. Other potential  
49 targets for such inhibitors are human cysteine cathepsins, which are involved in

50 different disease states. Thus, the inhibitors were also tested against cathepsins B,  
51 L, K, and S. Our results demonstrate that inhibition of these cysteine proteases can  
52 be achieved by appropriate structural modifications of dipeptidyl nitriles. It was also  
53 possible to identify trypanocidal agents, equipotent to benznidazole, the current drug  
54 of choice used for the treatment of Chagas disease.

55

## 56 **Introduction**

57 Chagas disease, aka American trypanosomiasis, is a serious health and social  
58 problem in Latin America and new non-endemic areas such as Japan, East Europe,  
59 and the USA. Chagas disease has an annual incidence of 30,000 new cases and  
60 14,000 deaths per year. In addition, more than 70,000 million people living in areas  
61 where they are at risk of contracting the disease [1].

62 The etiological agent, the protozoa parasite *Trypanosoma cruzi* (*T. cruzi*), is  
63 transmitted by blood-sucking reduviid bugs of the subfamily Triatominae [2]. The only  
64 two existing drugs in the market, benznidazole and nifurtimox, show strong side  
65 effects and inefficiency in the chronic stage of the disease [3,4]. New safe and  
66 efficacious drugs are therefore required to address with these still unmet medical  
67 needs. Initiatives such as the one launched by the Drugs for Neglected Diseases  
68 (DNDi) have led to worldwide collaborative efforts to discover new therapeutic  
69 targets [5]. Cruzain (Cz), a recombinant form of the enzyme cruzipain (EC 3.4.22.51)  
70 [6], is the most abundant cysteine protease (CP) present in the parasite and  
71 essential for its development and survival inside and outside the host cell in all forms  
72 of its life cycle. This makes Cz a druggable target for the development of new  
73 chemotherapeutic agents against Chagas disease [7,8].

74 Cz represents a target for irreversible (or suicide) and reversible inhibitors. K777 was  
75 at the forefront of the first generation of irreversible Cz inhibitors and initially  
76 characterized by the Sandler Center for Research in Tropical Parasitic Disease  
77 (University of California, San Francisco) [9]. Despite its ability to rescue mice of a  
78 lethal experimental *T. cruzi* infection and reduce parasite growth in dogs, preclinical  
79 safety and toxicology studies revealed substantial side effects of K777 in primates  
80 and dogs, even when administered in low doses [10,11]. Current research is being  
81 focused on reversible Cz inhibitors as these are assumed to overcome possible off-  
82 target effects [12].

83 The structure of Cz is closely related to those of mammalian CPs (CatL, CatK and  
84 CatS). Three-dimensional (3D) structures of Cz a variety of ligands have already  
85 been resolved [13], enabling the applicability of target-based molecular design to find  
86 Cz-inhibiting P1, P2, and P3 positions of dipeptidyl nitrile ligands with the respective  
87 subsites of the enzyme (S1, S2, S3) and the trypanocidal activities of such inhibitors  
88 [14]. In this study, we designed a new, structurally expanded series of 26 Cz-  
89 inhibiting dipeptidyl nitriles, in particular by leveraging the P1-S1/S1' interactions. We  
90 explored the structure-activity relationships (SARs), mapped the active site of the  
91 target enzyme and evaluated the antichagasic properties of the compounds. Besides  
92 that, we have tested them against four human cysteine cathepsins (CatB, CatL,  
93 CatK, CatS) all of which constituting important targets for human diseases [15], and  
94 against the cysteine protease LmCPB, a novel macromolecular target to fight  
95 *Leishmania mexicana*. As a result of this study, several new low-nanomolar  
96 inhibitors of different CPs were discovered and the action of three representatives on  
97 *T. cruzi*, being equipotent to benznidazole, was characterized.

## 98 **Methods**

99

## 100 **Modelling**

101 Putative binding modes of novel dipeptidyl nitrile inhibitors compounds were derived  
102 from the crystal structure of *N*-(2-aminoethyl)- $\alpha$ -benzoyl-L-phenylalaninamide  
103 (33L) bound to Cz (PDB ID: 4QH6). This ligand-target-complex served as a template  
104 for knowledge-based modelling and was preprocessed using the “Structure  
105 Preparation” and “Protonate3D”-tools of the modeling software “Molecular Operating  
106 Environment” (MOE) [16], version 2018.0101, with default settings. By modification  
107 of moieties, the cocrystallized ligand was structurally transformed to the compound  
108 of interest. Obtained conformations were optimized using the force field  
109 “Amber10:EHT”.

110

## 111 **Synthetic chemistry**

112

### 113 **Fig 1. General synthesis of compounds 6-19.**

114 Reagents and conditions: a) HATU, DIPEA, 1-amino-1-cyclopropanecarbonitrile,  
115 DMF, rt, 18 h; b) formic acid, rt, 18 h; c) HATU or TBTU, DIPEA, carboxylic acid,  
116 DMF, rt, 18 h; d) DDQ, DCM, rt, 18 h.

117

### 118 **Fig 2. General synthesis of compounds 50-60, 65-69.**

119 Reagents and conditions: a) Isobutyl chloroformate,  $\text{NH}_4\text{Cl}$  2 M, DIPEA, DMF, 0 °C  
120 to rt, 20 h; b) TFA,  $\text{CH}_2\text{Cl}_2$ , 0 °C to rt, 2 h; c) HATU, DIPEA, Boc-AA-OH, DMF, rt, 18  
121 h; d) TFA,  $\text{CH}_2\text{Cl}_2$ , 0 °C to rt, 2 h; e) TBTU, DIPEA, 3-(*tert*-butyl)-1-methyl-1*H*-

122 pyrazole-5-carboxylic acid, DMF/CH<sub>2</sub>Cl<sub>2</sub>, rt, 18 h; f) Cyanuric chloride, DMF, 0 °C to  
123 rt, 0.5 h; g) H<sub>2</sub> (1 atm), Pd/C, rt, 18 h; h) *p*-TsCl, Py, rt, 3-5 days; i) TFAA, DIPEA,  
124 THF, 0 °C to rt, 2 h.

125

126 **General considerations.** Synthesis was performed as summarized in Fig 1 and Fig 2.  
127 Melting points were determined on a Büchi 510 oil bath apparatus and are  
128 uncorrected. Infrared spectra were obtained from FT-IR Thermo Scientific Nicolet  
129 380. Reagents, starting materials and solvents were of commercial quality and were  
130 used without further purification unless otherwise stated. All syntheses were started  
131 with enantiopure amino acids. TLC analysis was carried out on Merck 60 F<sub>254</sub> silica  
132 gel plates and visualized under UV light at 254 nm and 365 nm or by using ninhydrin  
133 staining solution. Preparative column chromatography was carried out on Grace  
134 Davison Davisil LC60A 20-45 micron or Merck Geduran Si60 63-200 micron silica  
135 using the Interchim PuriFlash 430 automated flash chromatography system. The  
136 purity of all tested compounds was determined with one of the three protocols (A-C)  
137 noted below.

138 A) Purity was determined via RP-HPLC on a Hewlett Packard 1090 Series II LC with  
139 a Phenomenex Luna C18 column (150 x 4.6 mm, 5 µm) and detection was  
140 performed by a UV DAD (200 – 440 nm). Elution was carried out with the following  
141 gradient: 0.01 M KH<sub>2</sub>PO<sub>4</sub>, pH 2.30 (solvent A), MeOH (solvent B), 40% B to 85% B in  
142 8 min, 85% B for 5 min, 85% to 40 % B in 1 min, 40% B for 2 min, stop time 16 min,  
143 flow 1.5 mL/min.

144 B) Purity was determined using an LC-MS instrument (ABSCIEX API 2000 LC-  
145 MS/MS, HPLC Agilent 1100) with a Phenomenex Luna C18 HPLC column (50 x 2.00

146 mm, 3  $\mu$ m) and detection was performed by a UV DAD (200 – 440 nm). Elution was  
147 carried out with the following gradient: 0.02 M  $\text{NH}_4\text{CH}_3\text{CO}_2$ , pH 7.0 (solvent A),  
148 MeOH (solvent B) start with 100%, 10% B in 20 min to 100% B, 10 min 100% B, stop  
149 time 20 min, flow 0.25 mL/min.

150 C) Purity was determined with an LC-MS instrument (AmaZon SL ESI-MS,  
151 Shimadzu LC) with a cellulose-2 Phenomenex column (250 x 4.6 mm, 5  $\mu$ m) or a  
152 Diacel column (IC-chiralpak, 250 x 4.6 mm, 5  $\mu$ m). An isocratic elution with MeCN  
153 and water was applied as specified, stop time 60 min, flow 0.5 mL/min.

154 NMR spectra were recorded on Bruker Avance 200 MHz, Bruker Avance 400 MHz,  
155 and Bruker Avance DRX 500 MHz NMR spectrometers. Chemical shifts are reported  
156 in ppm relative to TMS or the residual proton peak of the re-protonated deuterated  
157 solvent, and the spectra were calibrated against the residual proton peak of the used  
158 deuterated solvent. The following symbols indicate spin multiplicities: s (singlet), s br  
159 (broad singlet), d (doublet), dd (doublet of doublet), t (triplet), tt (triplet of triplet), q  
160 (quartet), sept (septet), and m (multiplet). Standard mass spectra were obtained  
161 either as ESI-MS (pos. and/or neg. mode) from a Advion DCMS interface, (settings  
162 as follows: ESI voltage 3,50 kV, capillary voltage 187 V, source voltage 44 V,  
163 capillary temperature 250 °C, desolvation gas temperature 250 °C, gas flow 5 L/min)  
164 or by an API 2000 mass spectrometer (electron spray ion source, ABSCIEX,  
165 Darmstadt, Germany) coupled to an Agilent 1100 HPLC system.

166 HRMS spectra were recorded on a Bruker micrOTOF-Q mass spectrometer  
167 connected to a Thermo Scientific Dionex UltiMate 3000 LC via an ESI interface using  
168 a Nucleodur C18 Gravity column (50 x 2.0 mm, 3  $\mu$ m) or were recorded on Thermo  
169 Scientific LTQ Velos Orbitrap, in electrospray ionization (ESI) mode by direct  
170 injection.

171 The synthetic route was developed to optimize the set of substituents to be placed in  
172 P1, P2, and P3 that have been defined after the planning and design studies. Due to  
173 the diversity of building blocks, it was necessary to evaluate different coupling and  
174 dehydrating reagents, aiming at the best yield and preventing racemization.**Error!**  
175 **Bookmark not defined.**

176

177 **General procedure for amide synthesis. Method A:** Isobutyl chloroformate (790  
178 mg, 0.75 mL, 5.5 mmol, 1.1 equiv) was added dropwise to a solution of Boc-(*R* or *S*)  
179 amino acid (5.0 mmol, 1.0 equiv.), DIPEA (1.6 g, 2.28 mL, 13.0 mmol, 2.6 equiv.) in  
180 dry DMF (20 mL), under argon atmosphere, at -30 °C and it was stirred for 0.5 h.  
181 Then, an aqueous 2 M NH<sub>4</sub>Cl solution (294 mg, 2.75 mL, 5.50 mmol, 1.1 equiv.) was  
182 added. The resulting solution was stirred at room temperature for 20 h. The reaction  
183 mixture was dried under reduced pressure. Ethyl acetate (100 mL) was added, and it  
184 was washed with a saturated NaHCO<sub>3</sub> solution (3 × 50 mL) and brine (1 × 50 mL).  
185 The organic phase was dried over Na<sub>2</sub>SO<sub>4</sub> and evaporated under reduced pressure  
186 to give a crude residue that was purified by flash column chromatography.

187 **Method B:** The free primary amine (1.0 mmol, 1.0 equiv.) was added to a solution of  
188 the carboxylic acid (1.3 mmol, 1.3 equiv.), HATU (490 mg, 1.3 mmol, 1.3 equiv.) and  
189 DIPEA (364 mg, 0.45 mL, 2.60 mmol, 2.6 equiv.) in dry DMF (5 mL) under argon  
190 atmosphere. The resulting solution was stirred at room temperature for 20 h. The  
191 reaction mixture was diluted with ethyl acetate (10 mL) and washed with a saturated  
192 NaHCO<sub>3</sub> solution (3 × 20 mL) and brine (3 × 20 mL). The organic phase was dried  
193 over Na<sub>2</sub>SO<sub>4</sub> and evaporated to give a crude residue that was purified by flash  
194 column chromatography.



195 **Method C:** The free primary amine (1.0 mmol, 1.0 equiv.) was added to a solution of  
196 the carboxylic acid (1.3 mmol, 1.3 equiv.), TBTU (410 mg, 1.30 mmol, 1.3 equiv.)  
197 and DIPEA (364 mg, 0.45 mL, 2.60 mmol) in dry DMF/CH<sub>2</sub>Cl<sub>2</sub> (1:1, 10 mL) under  
198 argon atmosphere. The resulting solution was stirred at room temperature for 20 h.  
199 The reaction mixture was diluted with ethyl acetate (10 mL) and washed with a  
200 saturated NaHCO<sub>3</sub> solution (3 × 20 mL) and brine (3 × 20 mL). The organic phase  
201 was dried over Na<sub>2</sub>SO<sub>4</sub> and evaporated to give a crude residue that was purified by  
202 flash column chromatography.

203

204 **General procedure for removal of the Boc protecting group. Method A:** The  
205 Boc-protected amino compound (0.25 mmol, 1.0 equiv.) was treated with formic acid  
206 (2.44 g, 2.0 mL, 47.9 mmol, 47.9 equiv.) at room temperature. The resulting solution  
207 was stirred for 18 h. The reaction mixture was evaporated under reduced pressure to  
208 get a yellowish oil. It was treated with an aqueous solution of 1.0 M NaOH until pH 9  
209 was reached. The product was extracted with ethyl acetate (4 × 20 mL) and then  
210 washed with brine (1 × 20 mL). The organic phase was evaporated to obtain a  
211 colorless oil. The formation of the product was confirmed by TLC (ethyl acetate). The  
212 product was used for the next step without further purification.

213 **Method B:** To a solution of Boc-protected amino compound (1.0 mmol, 1.0 equiv.) in  
214 dry CH<sub>2</sub>Cl<sub>2</sub> (3 mL) was added TFA (912 mg, 0.91 mL, 8.00 mmol, 8.0 equiv.) at 0 °C.  
215 The mixture was stirred and allowed to reach room temperature within 2 h. The  
216 progress of the reaction was monitored by TLC (ethyl acetate). The reaction mixture  
217 was evaporated under reduced pressure to eliminate the excess of TFA to get a  
218 yellowish solid. The product was used for the next step without further purification.

219

220 **General procedure for dehydration of primary amides to nitriles. Method A:** The  
221 primary amide (1.0 mmol, 1.0 equiv.) was dissolved in dry DMF (5 mL) at 0 °C. Then,  
222 cyanuric chloride (73 mg, 0.4 mmol, 1.1 equiv.) was slowly added to the solution  
223 under argon atmosphere. The resulted solution was stirred for 0.5 h. Saturated  
224 NaHCO<sub>3</sub> solution (30 mL) was added and it was stirred at room temperature for 2 h.  
225 The product was extracted with ethyl acetate (2 x 50 mL), and then the reunited  
226 organic phases were washed with an aqueous solution of 1.0 M KHSO<sub>4</sub> (3 x 20 mL),  
227 brine (4 x 30 mL) and dried over Na<sub>2</sub>SO<sub>4</sub>. The solvent was removed, and the crude  
228 product was purified by flash silica gel chromatography.

229 **Method B:** The primary amide (1.0 mmol, 1.0 equiv.) was dissolved in dry THF (5  
230 mL) and DIPEA (364 mg, 0.45 mL, 2.6 mmol, 2.6 equiv.) was added. Trifluoroacetic  
231 anhydride (273 mg, 0.18 mL, 1.30 mmol, 1.3 equiv.), was added over 5 min, at 0 °C.  
232 The mixture was stirred and allowed to reach room temperature within 2 h. Then the  
233 reaction was quenched with H<sub>2</sub>O (20 mL), THF removed in vacuo, and the product  
234 was extracted into ethyl acetate (2 x 50 mL). The organic phase was washed with a  
235 solution 1.0 M of KHSO<sub>4</sub> (3 x 20 mL) and with a saturated NaHCO<sub>3</sub> solution (3 x 20  
236 mL) and brine (3 x 20 mL) and dried over Na<sub>2</sub>SO<sub>4</sub>. The solvent was removed, and  
237 the crude product was purified by flash silica gel chromatography.

238 **Method C:** The primary amide (1.0 mmol, 1.0 equiv.) was dissolved in dry pyridine  
239 (5 mL) at room temperature. Then, *p*-toluenesulfonyl chloride (572 mg, 3.0 mmol, 3.0  
240 equiv.) was added to the solution under argon atmosphere. The resulting solution  
241 was stirred for 3 days. Upon addition of saturated NaHCO<sub>3</sub> solution (30 mL), the  
242 reaction mixture was stirred at room temperature for 2 h. The solution was dried

243 under reduced pressure. The product was extracted with ethyl acetate (2 × 50 mL),  
244 and then the reunited organic phases were washed with a 1.0 M solution of KHSO<sub>4</sub>  
245 (2 × 20 mL), brine (4 × 30 mL) and dried over Na<sub>2</sub>SO<sub>4</sub>. The solvent was removed,  
246 and the crude product was purified by flash silica gel chromatography.

247

248 **General procedure for removal of the benzyl protecting group. Method A:** The  
249 corresponding protected threonine (1.0 mmol, 1.0 equiv.) was dissolved in ethanol  
250 absolute (20 mL) in an argon atmosphere. Upon addition of 10% Pd/C, H<sub>2</sub> was  
251 bubbled in the solution for 0.5 h. The resulting solution was stirred under H<sub>2</sub>  
252 atmosphere for 12 h. The progress of the reaction was monitored by TLC (ethyl  
253 acetate). The solution was filtered on celite two times and dried under reduced  
254 pressure to afford the desired product as a colorless wax. The product was used for  
255 the next step without further purification.

256 **Method B:** The corresponding protected threonine (1.0 mmol, 1.0 equiv.) was  
257 dissolved in dry CH<sub>2</sub>Cl<sub>2</sub> (20 mL) under argon atmosphere. Then, DDQ (908 mg, 4.0  
258 mmol, 4.0 equiv.) was added, and the resulting solution was stirred for 4 days at  
259 room temperature. The progress of the reaction was monitored by TLC (ethyl  
260 acetate). The reaction was quenched with an aqueous 1.0 M solution of NaHSO<sub>3</sub> (20  
261 mL). Then, CH<sub>2</sub>Cl<sub>2</sub> was removed under reduced pressure. The product was  
262 extracted with ethyl acetate (2 × 50 mL), and the reunited organic phases were  
263 washed with an aqueous solution of 1.0 M KHSO<sub>4</sub> (2 × 20 mL), brine (4 × 30 mL)  
264 and dried over Na<sub>2</sub>SO<sub>4</sub>. The solvent was removed, and the crude product was  
265 purified by flash silica gel chromatography.

266

267

268 **Synthesis and characterization of compound 1-5.** Compounds **1-5** have been  
269 synthesized from the corresponding amino acid and 1-amino-1-  
270 cyclopropanecarbonitrile following the general procedure for amide synthesis  
271 (method B) [14].

272 *(S)-tert-Butyl (1-((1-cyanocyclopropyl)amino)-1-oxo-3-phenylpropan-2-yl)carbamate*  
273 **(1)**

274 Yield 92%. White solid.  $R_f$  = 0.9 (ethyl acetate: *n*-hexane; 7:3). Mp. 146–147 °C.  $^1\text{H}$   
275 NMR (500 MHz,  $\text{CDCl}_3$ )  $\delta$  7.27 – 7.04 (m, 5H), 4.58 (m, 1H), 3.19 (dd,  $J$  = 13.8, 5.0  
276 Hz, 1H), 2.88 (dd,  $J$  = 9.5, 5.0 Hz, 1H), 1.31 (s, 9H), 1.25 (m, 2H), 1.04 (m, 2H).  $^{13}\text{C}$   
277 NMR. (125 MHz,  $\text{CDCl}_3$ )  $\delta$  173.06, 155.30, 137.73, 129.35, 128.19, 126.45, 120.80,  
278 78.30, 55.54, 37.36, 28.26, 19.77, 15.80, 15.75. ESI-MS (+) Calc. for  $[\text{C}_{18}\text{H}_{23}\text{N}_3\text{O}_3]$   
279 329.39, found: 352.3  $[\text{M}+\text{Na}]^+$ .

280 *(S)-tert-Butyl (3-(3-chlorophenyl)-1-((1-cyanocyclopropyl)amino)-1-oxopropan-2-*  
281 *yl)carbamate (2)*

282 Yield 83%. White solid.  $R_f$  = 0.7 (ethyl acetate: *n*-hexane; 6:4). Mp. 146–147 °C.  $^1\text{H}$   
283 NMR (500 MHz,  $\text{CDCl}_3$ )  $\delta$  7.26 – 7.25 (m, 1H), 7.23 – 7.21 (m, 1H), 7.08 – 7.03 (m,  
284 2H), 4.27 – 4.24 (m, 1H), 3.10 (dd,  $J$  = 13.8, 5.0 Hz, 1H), 2.83 (dd,  $J$  = 9.5, 5.0 Hz,  
285 1H), 1.52 – 1.44 (m, 2H), 1.41 (s, 9H), 1.13 – 1.05 (m, 2H).  $^{13}\text{C}$  NMR (125 MHz,  
286  $\text{CDCl}_3$ ) 172.02, 155.61, 138.23, 134.32, 129.29, 127.49, 127.25, 119.48, 119.48,  
287 80.55, 55.28, 37.87, 28.18, 20.14, 16.68, 16.56. ESI-MS (+) Calc. for  $[\text{C}_{18}\text{H}_{22}\text{ClN}_3\text{O}_3]$   
288 363.83, found: 364.3  $[\text{M}+\text{H}]^+$ .

289 *(S)-tert-Butyl (1-((1-cyanocyclopropyl)amino)-1-oxo-3-(pyridin-4-yl)propan-2-*  
290 *yl)carbamate (3)*

291 Yield 75%. White solid.  $R_f$  = 0.5 (ethyl acetate: *n*-hexane; 4:6). Mp. 134–135 °C.  $^1\text{H}$   
292 NMR (200 MHz,  $\text{CD}_3\text{OD}$ )  $\delta$  8.45 (d,  $J$  = 4.9 Hz, 2H), 7.34 (d,  $J$  = 5.8 Hz, 2H), 4.36 –  
293 4.23 (m, 1H), 2.96 (dd,  $J$  = 14.0, 5.0 Hz, 2H), 1.53 – 1.46 (m, 1H), 1.38 (s, 9H), 1.20  
294 – 1.14 (m, 2H).  $^{13}\text{C}$  NMR (50 MHz,  $\text{CDCl}_3$ )  $\delta$  174.74, 149.95, 149.15, 126.52, 121.09,  
295 80.79, 56.03, 38.88, 38.31, 28.55, 21.21, 17.05. ESI-MS (+) Calc. for  $[\text{C}_{17}\text{H}_{22}\text{N}_4\text{O}_3]$   
296 330.38, found: 331.2  $[\text{M}+\text{H}]^+$ .

297 *(S)*-*tert*-Butyl (1-((1-cyanocyclopropyl)amino)-4-methyl-1-oxopentan-2-yl)carbamate  
298 (**4**)

299 Yield 61%. White solid.  $R_f$  = 0.7 (ethyl acetate: *n*-hexane; 4:6). Mp. 162–164 °C.  $^1\text{H}$   
300 NMR (500 MHz,  $\text{DMSO}-d_6$ )  $\delta$  8.76 (s, 1H), 6.86 (d,  $J$  = 7.9 Hz, 1H), 3.86 (dt,  $J$  = 8.7,  
301 5.5 Hz, 1H), 1.55-1.54 (m,  $J$  = 6.6 Hz, 1H), 1.44 (dd,  $J$  = 7.9, 5.5 Hz, 2H), 1.37 – 1.42  
302 (m, 2H), 1.36 (s, 9H), 1.07 (dd,  $J$  = 7.7, 5.3 Hz, 2H), 0.84 (2d,  $J$  = 6.6 Hz, 6H).  $^{13}\text{C}$   
303 NMR (125 MHz,  $\text{DMSO}-d_6$ )  $\delta$  174.17, 155.50, 120.92, 78.22, 52.58, 40.49, 28.31,  
304 24.38, 23.01, 21.66, 19.91, 15.87, 15.75. ESI-MS (+) Calc. for  $[\text{C}_{15}\text{H}_{25}\text{N}_3\text{O}_3]$  295.37,  
305 found: 318.3  $[\text{M}+\text{Na}]^+$ .

306 *tert*-Butyl ((2*S*,3*R*)-3-(benzyloxy)-1-((1-cyanocyclopropyl)amino)-1-oxobutan-2-  
307 yl)carbamate (**5**)

308 Yield 89%. White solid.  $R_f$  = 0.7 (ethyl acetate: *n*-hexane; 4:6). Mp. 88–90 °C.  $^1\text{H}$   
309 NMR (200 MHz,  $\text{CDCl}_3$ )  $\delta$  7.36 – 7.32 (m, 5H), 4.78 – 4.60 (m, 3H), 4.22 – 4.12 (m,  
310 1H), 1.57 – 1.44 (m, 2H), 1.30 – 1.27 (m, 9H), 1.17 – 1.13 (m, 5H). ESI-MS (+) Calc.  
311 for  $[\text{C}_{20}\text{H}_{27}\text{N}_3\text{O}_4]$  373.44, found: 396.4  $[\text{M}+\text{Na}]^+$ .

312

313 **Synthesis of compounds 6-18.** Compounds **6-18** have been synthesized in two  
314 steps from compounds **1-5**. First, the Boc group was removed (procedure A), and

315 then the free amine was coupled to the carboxylic acid following the general  
316 procedure for amide synthesis (method B or method C, as indicated).

317 Synthesis and characterization of compounds **6**, **9** and **11** have been already  
318 published elsewhere [13].

319 *(S)-N-(3-(3-Chlorophenyl)-1-((1-cyanocyclopropyl)amino)-1-oxopropan-2-*  
320 *yl)benzamide (7)*

321 Method B. Yield 86%. White solid.  $R_f = 0.7$  (ethyl acetate: *n*-hexane; 6:4). Mp. 213 –  
322 215 °C.  $^1\text{H}$  NMR (500 MHz, DMSO- $d_6$ )  $\delta$  9.04 (s, 1H), 8.67 (d,  $J = 8.1$  Hz, 1H), 7.84  
323 – 7.83 (m, 2H), 7.56 – 7.54 (m, 1H), 7.53 (t,  $J = 7.7$  Hz, 2H), 7.41 (s, 1H), 7.32 – 7.25  
324 (m, 3H), 4.65 – 4.60 (m, 1H), 3.09 (dd,  $J = 13.6, 5.0$  Hz, 1H), 3.02 (dd,  $J = 15.2, 5.0$   
325 Hz, 1H), 1.51 – 1.49 (m, 2H), 1.12 – 1.06 (m, 2H).  $^{13}\text{C}$  NMR (125 MHz, DMSO- $d_6$ )  $\delta$   
326 172.57, 166.48, 140.62, 132.82, 131.52, 130.04, 129.18, 128.31, 128.05, 127.58,  
327 126.50, 120.81, 54.47, 36.60, 19.90, 15.82. HRMS (+) Calc. for  $[\text{C}_{20}\text{H}_{19}\text{ClN}_3\text{O}_2]^+$   
328 368.11658, found: 368.11615  $[\text{M}+\text{H}]^+$ . HPLC (protocol B):  $t_R$  (min) = 10.29. Purity:  
329 99.6%.

330 *(S)-3-(tert-Butyl)-N-(3-(3-chlorophenyl)-1-((1-cyanocyclopropyl)amino)-1-oxopropan-*  
331 *2-yl)-1-methyl-1H-pyrazole-5-carboxamide (8)*

332 Method C. Method B. Yield 72%. Yellowish solid.  $R_f = 0.7$  (ethyl acetate: *n*-hexane;  
333 5:5). Mp. 152 – 154 °C.  $^1\text{H}$  NMR (400 MHz, DMSO- $d_6$ )  $\delta$  9.03 (s, 1H), 8.59 (d,  $J =$   
334 8.4 Hz, 1H), 7.39 (s, 1H), 7.31 – 7.24 (m, 3H), 6.79 (s, 1H), 4.57 – 4.53 (m, 1H), 3.88  
335 (s, 3H), 3.08 (dd,  $J = 13.6, 5.1$  Hz, 1H), 2.94 (dd,  $J = 13.6, 10.2$  Hz, 1H), 1.50 – 1.47  
336 (m, 2H), 1.28 (s, 9H), 1.10 – 1.05 (m, 2H).  $^{13}\text{C}$  NMR (100 MHz, DMSO- $d_6$ )  $\delta$  172.10,  
337 159.46, 158.70, 140.26, 134.95, 132.64, 129.94, 129.15, 127.85, 126.39, 120.63,  
338 103.82, 55.21, 36.38, 31.58, 30.36, 19.75, 15.67, 15.61. HRMS (+) Calc. for

339  $[C_{22}H_{27}N_5O_2]^+$  428.18533, found: 428.1864  $[M+H]^+$ . HPLC (protocol B):  $t_R$  (min)=  
340 11.17. Purity: 98.3%.

341 *(S)*-3-(*tert*-Butyl)-*N*-(1-((1-cyanocyclopropyl)amino)-1-oxo-3-(pyridin-4-yl)propan-2-  
342 yl)-1-methyl-1*H*-pyrazole-5-carboxamide (**10**)

343 Method C. Yield 56%. Yellowish oil.  $R_f$  = 0.4 (ethyl acetate: *n*-hexane; 5:5).  $^1H$  NMR  
344 (200 MHz,  $CD_3OD$ )  $\delta$  8.48 – 8.46 (m, 2H), 7.43 (d,  $J$  = 4.9 Hz, 2H), 6.69 (s, 1H), 4.86  
345 – 4.78 (m, 1H), 3.95 (s, 3H), 3.04 – 3.02 (m, 1H), 2.89 – 2.84 (m, 1H), 1.56 – 1.50  
346 (m, 2H), 1.31 (d,  $J$  = 4.3 Hz, 9H), 1.22 – 1.18 (m, 2H).  $^{13}C$  NMR (50 MHz,  $CD_3OD$ )  $\delta$   
347 172.80, 160.35, 160.05, 148.62, 147.59, 134.80, 125.00, 119.66, 103.60, 53.18,  
348 37.37, 36.45, 31.42, 29.44, 19.92, 15.60, 15.28. FT-IR (KBr,  $cm^{-1}$ ) 3297.16, 2966.17,  
349 2242.31, 1670.63, 1601.36, 1531.90, 1425.65, 1352.10, 1278.55, 1241.77, 1049.72,  
350 988.42, 808.63, 755.51, 722.82, 511.19, 506.24, 489.90. HRMS (+) Calc. for  
351  $[C_{21}H_{27}N_6O_2]^+$  395.21955, found: 395.21973  $[M+H]^+$ . HPLC (protocol B):  $t_R$  (min) =  
352 3.68. Purity: 94.7%.

353 *N*-((2*S*,3*R*)-3-(Benzyloxy)-1-((1-cyanocyclopropyl)amino)-1-oxobutan-2-yl)-3-(*tert*-  
354 butyl)-1-methyl-1*H*-pyrazole-5-carboxamide (**12**)

355 Method C. Yield 53%. Yellowish solid.  $R_f$  = 0.4 (ethyl acetate: *n*-hexane; 6:4). Mp.  
356 100 – 101 °C.  $^1H$  NMR (200 MHz,  $CDCl_3$ )  $\delta$  7.36 – 7.32 (m, 5H), 6.45 (s, 1H), 4.76 –  
357 4.62 (m, 3H), 4.22 – 4.12 (m, 1H), 4.09 (s, 3H), 1.57 – 1.44 (m, 2H), 1.30 – 1.27 (m,  
358 9H), 1.20 – 1.13 (m, 5H).  $^{13}C$  NMR (50 MHz,  $CDCl_3$ )  $\delta$  170.36, 160.18, 159.74,  
359 137.15, 134.06, 128.48, 127.98, 127.68, 119.25, 103.18, 74.03, 71.48, 54.81, 38.38,  
360 31.66, 30.16, 28.68, 20.24, 16.91, 15.85. FT-IR (KBr,  $cm^{-1}$ ) 3288.99, 2953.92,  
361 2917.14, 2214.31, 1646.31, 1589.10, 1495.12, 1049.31, 1294.89, 1200.91, 1033.37,  
362 922.51, 755.51, 681.95. HRMS (+) Calc. for  $[C_{24}H_{32}N_5O_3]^+$  437.25051, found:  
363 438.25102  $[M+H]^+$ . HPLC (protocol B):  $t_R$  (min) = 8.77. Purity: 97.0%.

364

365 *(S)*-7-Chloro-*N*-(1-((1-cyanocyclopropyl)amino)-1-oxo-3-phenylpropan-2-yl)quinoline-  
366 4-carboxamide (**13**)

367 Method B. Yield 74%. White solid.  $R_f$  = 0.7 (ethyl acetate: *n*-hexane; 8:2). Mp. 260 –  
368 262 °C.  $^1\text{H}$  NMR (400 MHz, DMSO- $d_6$ )  $\delta$  9.15 (d,  $J$  = 10.2 Hz, 1H), 9.13 (s, 1H), 8.97  
369 (d,  $J$  = 10.2 Hz, 1H), 8.10 (d,  $J$  = 2.1 Hz, 1H), 7.72 (d,  $J$  = 15 Hz, 1H), 7.56 (dd,  $J$  =  
370 15.1, 10.2 Hz, 1H), 7.44 (d,  $J$  = 10.2 Hz, 1H), 7.28 – 7.24 (m, 5H), 4.75 – 4.73 (m,  
371 1H), 3.11 (dd,  $J$  = 13.8, 5.0 Hz, 1H), 2.87 (dd,  $J$  = 9.5, 5.0 Hz, 1H), 1.51 – 1.49 (m,  
372 2H), 1.09 – 1.07 (m, 1H).  $^{13}\text{C}$  NMR (100 MHz, DMSO- $d_6$ )  $\delta$  172.34, 166.33, 151.74,  
373 148.36, 141.88, 137.63, 134.53, 129.45, 128.42, 128.00, 127.86, 126.74, 122.89,  
374 120.91, 119.69, 54.56, 37.26, 20.02, 15.89. FT-IR (KBr,  $\text{cm}^{-1}$ ) 3254.05, 2926.14,  
375 2247.17, 1672.36, 1668.36, 1523.83, 846.79, 831.36. HRMS (+) Calc. for  
376  $[\text{C}_{23}\text{H}_{20}\text{ClN}_4\text{O}_2]^+$  418.12748, found: 419.12813  $[\text{M}+\text{H}]^+$ . HPLC (protocol C, 50:50  
377 ACN: water):  $t_R$  (min) = 17.32. Purity: 99.9%.

378 *(S)*-7-Chloro-*N*-(1-((1-cyanocyclopropyl)amino)-4-methyl-1-oxopentan-2-yl)quinoline-  
379 4-carboxamide (**14**)

380 Method B. Yield 68%. White solid.  $R_f$  = 0.7 (ethyl acetate). Mp. 169 – 170 °C.  $^1\text{H}$   
381 NMR (400 MHz, DMSO- $d_6$ )  $\delta$  9.10 (s, 1H), 9.05 (s, 1H), 9.02 (d,  $J$  = 5.5 Hz, 1H) 8.20  
382 (d,  $J$  = 11.5 Hz, 1H), 8.15 (d,  $J$  = 2.5 Hz, 1H), 7.72 (dd,  $J$  = 11.5, 2.5 Hz, 1H), 7.60 (d,  
383  $J$  = 5.5 Hz, 1H), 4.48 – 4.46 (m, 1H), 1.70 – 1.63 (m, 3H), 1.52 – 1.48 (m, 2H), 1.19 –  
384 1.14 (m, 2H), 0.92 (2d,  $J$  = 10.5 Hz, 6H).  $^{13}\text{C}$  NMR (100 MHz, DMSO- $d_6$ )  $\delta$  173.63,  
385 166.83, 152.05, 148.70, 142.06, 134.83, 131.26, 128.38, 123.35, 121.21, 120.20,  
386 51.97, 24.87, 23.38, 21.79, 20.34, 16.22, 16.06. FT-IR (KBr,  $\text{cm}^{-1}$ ) 3402.4, 3257.7,  
387 3030.1, 2960.7, 2247.0, 1674.2, 1633.7, 1529.5, 1296.1, 831.31. HRMS (+) Calc. for



388  $[\text{C}_{20}\text{H}_{22}\text{ClN}_4\text{O}_2]^+$  384.14313, found: 385.14503  $[\text{M}+\text{H}]^+$ . HPLC (protocol C, 65:35  
389 ACN: water):  $t_{\text{R}}$  (min) = 11.81. Purity: 96.2%.

390 *(S)*-7-Chloro-*N*-(1-((1-cyanocyclopropyl)amino)-3-(1*H*-indol-3-yl)-1-oxopropan-2-  
391 yl)quinoline-4-carboxamide (**15**)

392 Method B. Yield 49%. Yellowish solid.  $R_f$  = 0.3 (ethyl acetate). Mp. 196 – 197 °C.  $^1\text{H}$   
393 NMR (400 MHz,  $\text{DMSO-}d_6$ )  $\delta$  10.88 (s, 1H), 9.15 (s, 1H), 9.08 (d,  $J$  = 10.2 Hz, 1H),  
394 8.97 (d,  $J$  = 4.2 Hz, 1H), 8.10 (d,  $J$  = 2.2 Hz, 1H), 7.68 (t,  $J$  = 7.5 Hz, 1H), 7.54 – 7.52  
395 (m, 1H), 7.46 (d,  $J$  = 4.5 Hz, 1H), 7.38 (d,  $J$  = 10.2 Hz 1H), 7.16 (d,  $J$  = 2.4 Hz, 1H),  
396 7.09 (t,  $J$  = 5.5 Hz, 1H), 7.00 (t,  $J$  = 5.8 Hz, 1H), 4.81 – 4.79 (m, 1H), 3.20 (dd,  $J$  =  
397 13.8, 5.0 Hz, 1H), 3.05 (dd,  $J$  = 9.5, 5.0 Hz, 1H), 1.51 – 1.48 (m, 2H), 1.11 – 1.08 (m,  
398 2H).  $^{13}\text{C}$  NMR (100 MHz,  $\text{DMSO-}d_6$ )  $\delta$  173.02, 166.59, 151.94, 148.61, 142.38,  
399 136.57, 134.72, 128.23, 128.05, 128.03, 127.52, 124.56, 123.19, 121.46, 121.26,  
400 119.97, 119.03, 118.76, 111.81, 110.02, 54.26, 27.79, 20.33, 16.20. FT-IR (KBr,  $\text{cm}^{-1}$ )  
401 3254.05, 2926.14, 2247.17, 1672.36, 1665.34, 1522.83, 831.30, 732.98. HRMS  
402 (+) Calc. for  $[\text{C}_{25}\text{H}_{21}\text{ClN}_5\text{O}_2]^+$  458.13838, found: 458.13703  $[\text{M}+\text{H}]^+$ . HPLC (protocol  
403 C, 50:50 ACN: water):  $t_{\text{R}}$  (min) = 18.64. Purity: 99.6%.

404 *(S)*-3-(((1-((1-Cyanocyclopropyl)amino)-1-oxo-3-phenylpropan-2-yl)carbamoyl)phenyl  
405 benzoate (**16**)

406 Method B. Yield 89%. White solid.  $R_f$  = 0.7 (ethyl acetate: *n*-hexane; 6:4). Mp. 185 –  
407 187 °C.  $^1\text{H}$  NMR (400 MHz,  $\text{DMSO-}d_6$ )  $\delta$  9.05 (s, 1H), 8.79 (d,  $J$  = 8.0 Hz, 1H), 8.18  
408 – 8.16 (m, 2H), 7.81 – 7.78 (m, 3H), 7.64 (t,  $J$  = 8.5 Hz, 2H), 7.57 (t,  $J$  = 8.5 Hz, 2H),  
409 7.50 – 7.48 (m, 1H), 7.31 – 7.23 (m, 4H), 7.18 (tt,  $J$  = 7.0, 1.5 Hz, 1H), 4.64 – 4.59  
410 (m, 1H), 3.06 (dd,  $J$  = 13.6, 5.0 Hz, 1H), 3.00 (dd,  $J$  = 13.5, 8.5 Hz, 1H), 1.49 – 1.45  
411 (m, 2H), 1.06 – 1.01 (m, 2H).  $^{13}\text{C}$  NMR (100 MHz,  $\text{DMSO-}d_6$ )  $\delta$  173.04, 165.60,  
412 165.02, 150.88, 138.21, 135.72, 134.66, 130.27, 129.98, 129.57, 129.51, 129.16,

413 128.57, 126.83, 125.69, 125.53, 121.47, 121.15, 55.10, 37.36, 20.18, 16.15, 16.10,  
414 14.55. FT-IR (KBr,  $\text{cm}^{-1}$ ) 3254.05, 2926.14, 2247.17, 1672.36, 1668.36, 1523.83,  
415 846.79, 831.36. HRMS (+) Calc. for  $[\text{C}_{27}\text{H}_{24}\text{N}_3\text{O}_4]^+$  453.17668, found: 454.17800  
416  $[\text{M}+\text{H}]^+$ . HPLC (protocol C, 65:35 ACN: water):  $t_{\text{R}}$  (min) = 19.62. Purity: 99.9%.  
417 *(S)*-6-Amino-*N*-(1-((1-cyanocyclopropyl)amino)-4-methyl-1-oxopentan-2-  
418 yl)nicotinamide (**17**)

419 Method C. Yield 48%. Yellowish solid.  $R_f$  = 0.3 (ethyl acetate: methanol; 8:2). Mp.  
420 100 – 101 °C.  $^1\text{H}$  NMR (200 MHz,  $\text{CD}_3\text{OD}$ )  $\delta$  8.43 (s, 1H), 7.88 (d,  $J$  = 8.8, 2.1 Hz,  
421 1H), 6.54 (d,  $J$  = 8.9 Hz, 1H), 4.53 – 4.46 (m, 1H), 1.82 – 1.51 (m, 3H), 1.47 – 1.43  
422 (m, 2H), 1.24 – 1.17 (m, 2H), 0.96 – 0.93 (m, 6H).  $^{13}\text{C}$  NMR (50 MHz,  $\text{CD}_3\text{OD}$ )  $\delta$   
423 176.59, 168.58, 162.86, 149.21, 138.44, 121.42, 119.42, 109.12, 41.60, 26.13 23.54,  
424 21.98, 21.41, 17.15, 16.78. FT-IR (KBr,  $\text{cm}^{-1}$ ) 3288.99, 2953.92, 2917.14,  
425 2214.31, 1647.63, 1496.06, 1409.33, 1294.89, 1202.33, 1075.33, 1030.81, 922.54,  
426 763.49, 667.21. ESI-MS (+) Calc. for  $[\text{C}_{16}\text{H}_{22}\text{N}_5\text{O}_2]^+$  316.17735, found: 316.17713  
427  $[\text{M}+\text{H}]^+$ . HPLC (protocol B):  $t_{\text{R}}$  (min) = 8.77. Purity: 97.0%.

428 *(S)*-*N*-(1-((1-Cyanocyclopropyl)amino)-4-methyl-1-oxopentan-2-yl)-1*H*-pyrrolo[2,3-  
429 *b*]pyridine-5-carboxamide (**18**)  
430 Method C. Yield 45%. White solid.  $R_f$  = 0.3 (ethyl acetate: methanol; 8:2). Mp. 79 –  
431 80 °C.  $^1\text{H}$  NMR (200 MHz,  $\text{CD}_3\text{OD}$ )  $\delta$  8.71 (d,  $J$  = 1.8 Hz, 1H), 8.47 (d,  $J$  = 2.0 Hz,  
432 1H), 7.46 (d,  $J$  = 3.5 Hz, 1H), 6.57 (d,  $J$  = 3.5 Hz, 1H), 4.59 – 4.57 (m, 1H), 1.91 –  
433 1.56 (m, 3H), 1.54 – 1.49 (m, 2H), 1.29 – 1.25 (m, 2H), 1.01 – 0.89 (m, 6H).  $^{13}\text{C}$   
434 NMR (50 MHz,  $\text{CD}_3\text{OD}$ )  $\delta$  176.50, 169.61, 163.45, 150.38, 143.32, 129.52, 128.65,  
435 123.21, 120.94, 102.66, 53.50, 38.92, 26.18, 23.41, 22.02, 21.25, 17.17, 16.49. FT-  
436 IR (KBr,  $\text{cm}^{-1}$ ) 3286.44, 2933.89, 2924.14, 2216.51, 1647.63, 1588.10, 1496.06,  
437 1409.33, 1294.89, 1202.33, 1075.33, 1030.31, 922.54, 763.54, 667.21. ESI-MS (+)

438 Calc. for  $[C_{18}H_{22}N_5O_2]^+$  340.17753, found: 340.17689  $[M+H]^+$ . HPLC (protocol B):  $t_R$   
439 (min) = 5.38. Purity: 99.0%.

440

441

442 **Synthesis and characterization of compound 19.** Compound **19** has been  
443 synthesized from compound **12** by removal of the benzyl protecting group under mild  
444 conditions (protocol B).

445 *3-(tert-Butyl)-N-((2S,3R)-1-((1-cyanocyclopropyl)amino)-3-hydroxy-1-oxobutan-2-yl)-*  
446 *1-methyl-1H-pyrazole-5-carboxamide (19)*

447 Yield 40%. Yellowish solid.  $R_f$  = 0.3 (ethyl acetate). Mp. 201 – 202 °C.  $^1H$  NMR (200  
448 MHz,  $CD_3OD$ )  $\delta$  6.81 (s, 1H), 4.40 (d,  $J$  = 4.4 Hz, 1H), 4.23 – 4.18 (m, 1H), 4.04 (s,  
449 3H), 1.52 – 1.47(m, 2H), 1.32 (s, 9H), 1.29 – 1.18 (m, 5H).  $^{13}C$  NMR (50 MHz,  
450  $CD_3OD$ )  $\delta$  174.94, 163.34, 162.74, 137.60, 122.22, 106.16, 69.42, 61.17, 39.91,  
451 34.00, 31.94, 22.41, 21.45, 18.11, 17.83. FT-IR (KBr,  $cm^{-1}$ ) 3288.89, 2953.92,  
452 2917.14, 2214.31, 1646.31, 1589.10, 1495.12, 1049.31, 1294.89, 1200.91, 1033.97,  
453 922.51, 755.51, 681.95. ESI-MS (-) Calc. for  $[C_{17}H_{25}N_5O_3]^+$  348.20356, found:  
454 348.20314  $[M+H]^+$ . HPLC (protocol B):  $t_R$  (min) = 7.74. Purity: 98.0%.

455

456 **Synthesis of compounds 20-27.** Compounds **20-27** have been synthesized from  
457 the equivalent amino Boc-protected amino acid following the general procedure for  
458 amide synthesis (method A).

459 *(S)-tert-Butyl (1-amino-1-oxo-3-phenylpropan-2-yl)carbamate (20)*

460 Yield 77%. White solid.  $R_f$  = 0.6 (ethyl acetate). Mp. 146–149 °C.  $^1H$  NMR (200 MHz,  
461  $CD_3OD$ )  $\delta$  7.26 – 7.16 (m, 5H), 4.44 – 4.41 (m, 1H), 3.14 (dd,  $J$  = 13.7, 6.0 Hz, 1H),

462 2.88 (dd,  $J = 13.7, 8.1$  Hz, 1H), 1.23 (s, 9H).  $^{13}\text{C}$  NMR (50 MHz,  $\text{CD}_3\text{OD}$ )  $\delta$  173.98,  
463 155.60, 130.73, 124.93, 122.46, 118.22, 80.20, 54.02, 37.73, 27.94. ESI-MS (+)  
464 Calc. for  $[\text{C}_{14}\text{H}_{20}\text{N}_2\text{O}_3]$  264.31, found: 287.3  $[\text{M}+\text{Na}]^+$ .

465 *(R)*-tert-butyl (1-amino-1-oxo-3-phenylpropan-2-yl)carbamate (**21**)

466 Yield 79%. White solid.  $R_f = 0.6$  (ethyl acetate). Mp. 141–142 °C.  $^1\text{H}$  NMR (200 MHz,  
467  $\text{CD}_3\text{OD}$ )  $\delta$  7.24 – 7.17 (m, 5H), 4.42 – 4.37 (m, 1H), 3.14 (dd,  $J = 13.7, 6.0$  Hz, 1H),  
468 2.92 (dd,  $J = 13.7, 8.1$  Hz, 1H), 1.43 (s, 9H).  $^{13}\text{C}$  NMR (50 MHz,  $\text{CD}_3\text{OD}$ )  $\delta$  173.12,  
469 154.48, 133.36, 122.46, 121.75, 119.38, 83.51, 55.61, 38.38, 28.66. ESI-MS (+)  
470 Calc. for  $[\text{C}_{14}\text{H}_{20}\text{N}_2\text{O}_3]$  264.31, found: 287.3  $[\text{M}+\text{Na}]^+$ .

471 *(S)*-tert-Butyl (1-amino-4-methyl-1-oxopentan-2-yl)carbamate (**22**)

472 Yield 74%. White solid.  $R_f = 0.4$  (ethyl acetate). Mp. 138–141 °C.  $^1\text{H}$  NMR (200 MHz,  
473  $\text{CDCl}_3$ )  $\delta$  6.58 (s br, 1H), 6.13 (s br, 1H), 5.25 – 4.97 (m, 2H), 4.15 (s br, 1H), 1.73 –  
474 1.43 (m, 3H), 1.41 (s, 9H), 0.92 (d,  $J = 3.2$  Hz, 6H).  $^{13}\text{C}$  NMR (50 MHz,  $\text{CDCl}_3$ )  $\delta$   
475 172.34, 155.95, 71.56, 28.57, 28.18, 25.08, 23.21, 19.25. ESI-MS (+) Calc. for  
476  $[\text{C}_{11}\text{H}_{22}\text{N}_2\text{O}_3]$  230.30, found: 253.3  $[\text{M}+\text{Na}]^+$ .

477 *(R)*-tert-Butyl (1-amino-4-methyl-1-oxopentan-2-yl)carbamate (**23**)

478 Yield 71%. White solid.  $R_f = 0.4$  (ethyl acetate). Mp. 138–141 °C.  $^1\text{H}$  NMR (200 MHz,  
479  $\text{CDCl}_3$ )  $\delta$  6.64 (s br, 1H), 6.21 (s br, 1H), 5.21 – 4.98 (m, 2H), 4.16 (s br, 1H), 1.71 –  
480 1.45 (m, 3H), 1.42 (s, 9H), 0.93 (d,  $J = 3.2$  Hz, 6H).  $^{13}\text{C}$  NMR (50 MHz,  $\text{CDCl}_3$ )  $\delta$   
481 172.11, 155.37, 71.64, 28.61, 28.29, 25.15, 23.34, 19.30. ESI-MS (+) Calc. for  
482  $[\text{C}_{11}\text{H}_{22}\text{N}_2\text{O}_3]$  230.30, found: 253.3  $[\text{M}+\text{Na}]^+$ .

483 *(S)*-tert-Butyl (1-amino-3-(3-chlorophenyl)-1-oxopropan-2-yl)carbamate (**24**)

484 Yield 74%. White solid.  $R_f = 0.4$  (ethyl acetate). Mp. 111–112 °C.  $^1\text{H}$  NMR (200 MHz,  
485  $\text{CDCl}_3$ )  $\delta$  7.26 – 7.13 (m, 4H), 6.16 (s, 1H), 5.75 (s, 1H), 5.21 (d,  $J = 7.8$  Hz, 1H),  
486 4.42 – 4.36 (m, 1H), 3.19 – 2.94 (m, 2H), 1.44 (s, 9H).  $^{13}\text{C}$  NMR (50 MHz,  $\text{CDCl}_3$ )  $\delta$

487 173.53, 155.16, 138.90, 134.09, 130.04, 129.44, 127.55, 127.11, 80.31, 37.88,  
488 28.16. ESI-MS (+) Calc. for [C<sub>14</sub>H<sub>19</sub>ClN<sub>2</sub>O<sub>3</sub>] 298.77, found: 321.8 [M+Na]<sup>+</sup>.

489 *(S)*-*tert*-Butyl (1-amino-1-oxo-3-(pyridin-4-yl)propan-2-yl)carbamate (**25**)

490 Yield 92%. White solid. *R*<sub>f</sub> = 0.2 (ethyl acetate). Mp. 131–133 °C. <sup>1</sup>H NMR (200 MHz,  
491 CDCl<sub>3</sub>) δ 8.42 (d, *J* = 5.7 Hz, 2H), 7.22 (d, *J* = 5.9 Hz, 2H), 4.35 – 4.31 (m, 1H), 3.18  
492 (dd, *J* = 13.7, 6.0 Hz, 1H), 2.81 (dd, *J* = 13.7, 8.1 Hz, 1H), 1.49–1.33 (s br, 9H). <sup>13</sup>C  
493 NMR (50 MHz, CDCl<sub>3</sub>) δ 173.69, 155.86, 148.48, 147.61, 118.42, 80.22, 54.51,  
494 37.77, 27.89. ESI-MS (+) Calc. for [C<sub>13</sub>H<sub>19</sub>N<sub>3</sub>O<sub>3</sub>] 265.31, found: 266.2 [M+H]<sup>+</sup>.

495 *tert*-Butyl ((2*S*,3*R*)-1-amino-3-(benzyloxy)-1-oxobutan-2-yl)carbamate (**26**)

496 Yield 65%. White solid. *R*<sub>f</sub> = 0.5 (ethyl acetate). Mp. 145–147 °C. <sup>1</sup>H NMR (500 MHz,  
497 CDCl<sub>3</sub>) δ 7.37 – 7.28 (m, 5H), 6.50 (s, 1H), 5.70 – 5.51 (m, 2H), 4.62 (q, *J* = 4.6 Hz,  
498 2H), 4.34 – 4.31 (m, 1H), 4.18 – 4.11 (m, 1H), 1.45 (s, 9H), 1.19 (d, *J* = 6.3 Hz, 3H).  
499 <sup>13</sup>C NMR (125 MHz, CDCl<sub>3</sub>) δ 172.09, 155.66, 137.78, 128.41, 127.82, 127.73,  
500 80.03, 74.53, 71.61, 57.13, 28.23, 27.84, 18.92. ESI-MS (+) Calc. for [C<sub>16</sub>H<sub>24</sub>N<sub>2</sub>O<sub>4</sub>]  
501 308.37, found: 331.4 [M+Na]<sup>+</sup>.

502 *tert*-Butyl ((2*R*,3*S*)-1-amino-3-(benzyloxy)-1-oxobutan-2-yl)carbamate (**27**)

503 Yield 68%. White solid. *R*<sub>f</sub> = 0.5 (ethyl acetate). Mp. 143–145 °C. <sup>1</sup>H NMR (500 MHz,  
504 CDCl<sub>3</sub>) δ 7.37 – 7.28 (m, 5H), 6.50 (s, 1H), 5.70 – 5.51 (m, 2H), 4.62 (q, *J* = 4.6 Hz,  
505 2H), 4.33 (s br, 1H), 4.27 – 4.19 (m, 1H), 1.45 (s, 9H), 1.19 (d, *J* = 6.3 Hz, 3H). <sup>13</sup>C  
506 NMR (125 MHz, CDCl<sub>3</sub>) δ 172.74, 156.31, 138.44, 129.06, 128.47, 128.38, 80.68,  
507 77.16, 75.18, 72.26, 57.78, 28.89, 28.49, 19.57. ESI-MS (+) Calc. for [C<sub>16</sub>H<sub>24</sub>N<sub>2</sub>O<sub>4</sub>]  
508 308.37, found: 331.4 [M+Na]<sup>+</sup>.

509

510 **Synthesis of compounds 28-38.** Compounds **28-38** have been synthesized in two  
511 steps from their precursors **20-27**. After removal of the Boc-protecting group (method

512 B), the resulting free amine was coupled to the carboxylic acid following the general  
513 procedure for amide synthesis (method B).

514 *tert-Butyl* ((S)-1-(((S)-1-amino-1-oxo-3-phenylpropan-2-yl)amino)-1-oxo-3-  
515 *phenylpropan-2-yl)carbamate (28)*

516 Yield 92%. White solid.  $R_f$  = 0.8 (ethyl acetate). Mp. 186–188 °C.  $^1\text{H}$  NMR (200 MHz,  
517  $\text{CD}_3\text{OD}$ )  $\delta$  7.37 – 7.22 (m, 6H), 7.16 – 7.09 (m, 4H), 4.76 – 4.63 (m, 1H), 4.34 – 4.20  
518 (m, 1H), 3.15 – 2.95 (m, 2H), 2.91 – 2.62 (m, 2H), 1.39 (s, 9H).  $^{13}\text{C}$  NMR (50 MHz,  
519  $\text{CD}_3\text{OD}$ )  $\delta$  174.36, 172.35, 156.09, 136.44, 129.04, 128.35, 128.27, 126.78, 126.64,  
520 79.89, 56.00, 53.78, 37.73, 37.24, 27.84. ESI-MS (+) Calc. for  $[\text{C}_{23}\text{H}_{29}\text{N}_3\text{O}_4]$  411.49,  
521 found: 434.3  $[\text{M}+\text{Na}]^+$ .

522 *tert-Butyl* ((S)-1-(((R)-1-amino-1-oxo-3-phenylpropan-2-yl)amino)-1-oxo-3-  
523 *phenylpropan-2-yl)carbamate (29)*

524 Yield 92%. White solid.  $R_f$  = 0.8 (ethyl acetate). Mp. 185–187 °C.  $^1\text{H}$  NMR (200 MHz,  
525  $\text{CD}_3\text{OD}$ )  $\delta$  7.75 – 7.60 (m, 6H), 7.56 – 7.49 (m, 4H), 5.14 – 5.01 (m, 1H), 4.72 – 4.57  
526 (m, 1H), 3.53 – 3.33 (m, 2H), 3.29 – 3.00 (m, 2H), 1.77 (s, 9H).  $^{13}\text{C}$  NMR (50 MHz,  
527  $\text{CD}_3\text{OD}$ )  $\delta$  174.85, 172.83, 156.58, 136.93, 129.53, 128.83, 128.76, 127.26, 127.13,  
528 80.38, 56.49, 54.26, 38.22, 37.73, 28.33. ESI-MS (+) Calc. for  $[\text{C}_{23}\text{H}_{29}\text{N}_3\text{O}_4]$  411.49,  
529 found: 434.3  $[\text{M}+\text{Na}]^+$ .

530 *tert-Butyl* ((S)-1-(((S)-1-amino-4-methyl-1-oxopentan-2-yl)amino)-1-oxo-3-  
531 *phenylpropan-2-yl)carbamate (30)*

532 Yield 83%. White solid.  $R_f$  = 0.8 (ethyl acetate). Mp. 164–165 °C.  $^1\text{H}$  NMR (200 MHz,  
533  $\text{CD}_3\text{OD}$ )  $\delta$  7.24 – 7.20 (m, 5H), 4.33 – 4.28 (m, 1H), 4.11 – 4.05 (m, 1H), 3.03 – 2.93  
534 (m, 2H), 1.56 – 1.38 (m, 2H), 1.36 (s, 9H), 1.26 – 1.24 (m, 1H), 0.89 (d,  $J$  = 2.6 Hz,  
535 6H).  $^{13}\text{C}$  NMR (50 MHz,  $\text{CD}_3\text{OD}$ )  $\delta$  175.39, 154.59, 143.42, 136.55, 128.99, 128.29,

536 126.65, 84.91, 72.86, 52.36, 51.47, 27.61, 24.41, 22.20, 21.01. ESI-MS (+) Calc. for  
537 [C<sub>20</sub>H<sub>31</sub>N<sub>3</sub>O<sub>4</sub>] 377.48, found: 400.5 [M+Na]<sup>+</sup>.

538 *tert-Butyl* ((S)-1-(((R)-1-amino-4-methyl-1-oxopentan-2-yl)amino)-1-oxo-3-  
539 *phenylpropan-2-yl*)carbamate (**31**)

540 Yield 88%. White solid. *R<sub>f</sub>* = 0.8 (ethyl acetate). Mp. 168–170 °C. <sup>1</sup>H NMR (200 MHz,  
541 CD<sub>3</sub>OD) δ 7.24 – 7.21 (m, 5H), 4.31 – 4.21 (m, 1H), 4.11 – 4.09 (m, 1H), 3.04 – 2.94  
542 (m, 2H), 1.57 – 1.40 (m, 2H), 1.39 (s, 9H), 1.27 – 1.24 (m, 1H), 0.90 (d, *J* = 2.6 Hz,  
543 6H). <sup>13</sup>C NMR (50 MHz, CD<sub>3</sub>OD) δ 175.80, 155.00, 143.83, 136.96, 129.40, 128.70,  
544 127.06, 85.32, 77.16, 73.27, 52.78, 51.89, 28.02, 24.82, 22.61, 21.42. ESI-MS (+)  
545 Calc. for [C<sub>20</sub>H<sub>31</sub>N<sub>3</sub>O<sub>4</sub>] 377.48, found: 400.5 [M+Na]<sup>+</sup>.

546 *tert-Butyl* ((S)-1-(((S)-1-amino-3-(3-chlorophenyl)-1-oxopropan-2-yl)amino)-1-oxo-3-  
547 *phenylpropan-2-yl*)carbamate (**32**)

548 Yield 78%. White solid. *R<sub>f</sub>* = 0.6 (ethyl acetate). Mp. 148–150 °C. <sup>1</sup>H NMR (200 MHz,  
549 CDCl<sub>3</sub>) δ 7.38 – 7.26 (m, 7H), 7.10 – 7.06 (m, 2H), 6.63 (s br, 1H), 6.39 (s br, 1H),  
550 4.81 – 4.77 (m, 1H), 4.38 – 4.35 (m, 1H), 3.05 – 2.97 (m, 4H), 1.41 (s, 9H). <sup>13</sup>C NMR  
551 (50 MHz, CDCl<sub>3</sub>) δ 172.83, 161.82, 138.54, 136.14, 134.46, 133.26, 130.05, 129.51,  
552 129.36, 129.02, 127.69, 127.36, 126.78, 80.95, 62.51, 53.21, 52.76, 38.74, 28.23.  
553 ESI-MS (+) Calc. for [C<sub>23</sub>H<sub>28</sub>ClN<sub>3</sub>O<sub>4</sub>] 445.94, found: 468.8 [M+Na]<sup>+</sup>.

554 *tert-Butyl* ((S)-1-(((S)-1-amino-1-oxo-3-(pyridin-4-yl)propan-2-yl)amino)-1-oxo-3-  
555 *phenylpropan-2-yl*)carbamate (**33**)

556 Yield 71%. Yellowish solid. *R<sub>f</sub>* = 0.4 (ethyl acetate). Mp. 155–157 °C. <sup>1</sup>H NMR (200  
557 MHz, CD<sub>3</sub>OD) δ 8.63 (d, *J* = 5.7 Hz, 2H), 7.58 – 7.30 (m, 7H), 4.94 – 4.89 (1H, m),  
558 4.55 – 4.40 (m, 1H), 3.44 (dd, *J* = 13.8, 5.5 Hz, 2H), 3.28 – 2.93 (m, 2H), 1.60 (s,  
559 9H). <sup>13</sup>C NMR (50 MHz, CDCl<sub>3</sub>) δ 173.27, 172.38, 148.58, 140.95, 136.44, 135.10,

560 128.97, 128.32, 126.68, 124.97, 99.74, 55.40, 27.73, 23.92, 13.06, 10.47.ESI-MS (+)

561 Calc. for [C<sub>23</sub>H<sub>28</sub>ClN<sub>3</sub>O<sub>4</sub>] 445.94, found: 468.8 [M+Na]<sup>+</sup>.

562 *tert-Butyl ((S)-1-(((2S,3R)-1-amino-3-(benzyloxy)-1-oxobutan-2-yl)amino)-1-oxo-3-*

563 *phenylpropan-2-yl)carbamate (34)*

564 Yield 88%. Yellowish solid. *R<sub>f</sub>* = 0.8 (ethyl acetate). Mp. 161–163 °C. <sup>1</sup>H NMR (200

565 MHz, CDCl<sub>3</sub>) δ 7.38 – 7.26 (m, 7H), 7.10 – 7.06 (m, 2H), 6.63 (s br, 1H), 6.39 (s br,

566 1H), 5.65 (s br, 1H), 5.08 (s br, 1H), 4.81 – 4.77 (m, 1H), 4.38 – 4.35 (m, 1H), 3.15 –

567 2.97 (m, 5H), 1.74 – 1.47 (m, 3H), 1.41 (s, 9H). <sup>13</sup>C NMR (50 MHz, CDCl<sub>3</sub>) δ 172.98,

568 171.90, 156.38, 137.70, 136.53, 128.99, 128.42, 128.13, 127.64, 127.58, 126.75,

569 80.30, 74.03, 71.36, 60.44, 38.05, 27.67, 20.33, 15.75. ESI-MS (+) Calc. for

570 [C<sub>25</sub>H<sub>33</sub>N<sub>3</sub>O<sub>5</sub>] 455.55, found: 478.5 [M+Na]<sup>+</sup>.

571 *tert-Butyl ((S)-1-(((2R,3S)-1-amino-3-(benzyloxy)-1-oxobutan-2-yl)amino)-1-oxo-3-*

572 *phenylpropan-2-yl)carbamate (35)*

573 Yield 78%. Yellowish solid. *R<sub>f</sub>* = 0.8 (ethyl acetate). Mp. 138–139 °C. <sup>1</sup>H NMR (200

574 MHz, CDCl<sub>3</sub>) δ 7.40 – 7.37 (m, 7H), 7.11 – 7.08 (m, 2H), 6.58 (s br, 1H), 6.43 (s br,

575 1H), 5.61 (s br, 1H), 5.23 (s br, 1H), 4.83 – 4.78 (m, 1H), 4.34 – 4.31 (m, 1H), 3.32 –

576 2.85 (m, 5H), 1.39 (s, 9H), 1.19 – 1.09 m, 3H). <sup>13</sup>C NMR (50 MHz, CDCl<sub>3</sub>) δ 173.34,

577 172.27, 156.74, 138.07, 136.90, 129.35, 128.79, 128.49, 128.01, 127.95, 127.12,

578 80.66, 74.40, 71.73, 60.81, 38.42, 28.04, 20.70, 16.12.ESI-MS (+) Calc. for

579 [C<sub>25</sub>H<sub>33</sub>N<sub>3</sub>O<sub>5</sub>] 455.55, found: 478.5 [M+Na]<sup>+</sup>.

580 *tert-Butyl ((S)-1-(((2S,3R)-1-amino-3-(benzyloxy)-1-oxobutan-2-yl)amino)-4-methyl-*

581 *1-oxopentan-2-yl)carbamate (36)*

582 Yield 76%. Yellowish solid. *R<sub>f</sub>* = 0.8 (ethyl acetate). Mp. 88–91 °C. <sup>1</sup>H NMR (200

583 MHz, CDCl<sub>3</sub>) δ 7.30 – 7.22 (m, 5H), 7.19 – 7.15 (m, 1H), 6.24 (s br, 1H), 6.04 (s br,

584 1H), 5.36 (s br, 2H), 4.57 (s, 2H), 4.56 – 4.52 (m, 1H), 4.36 – 4.21 (m, 1H), 4.17 –



585 4.11 (m, 1H), 1.77 – 1.48 (m, 3H), 1.38 (s, 9H), 1.13 (d,  $J = 6.4$  Hz, 3H), 0.94 – 0.90  
586 (m, 6H).  $^{13}\text{C}$  NMR (50 MHz,  $\text{CDCl}_3$ )  $\delta$  172.84, 171.86, 155.98, 137.88, 128.29,  
587 127.66, 127.63, 80.38, 73.89, 71.58, 56.40, 54.01, 40.85, 28.12, 24.74, 22.92, 21.62.

588 ESI-MS (+) Calc. for  $[\text{C}_{22}\text{H}_{35}\text{N}_3\text{O}_5]$  421.53, found: 444.7  $[\text{M}+\text{Na}]^+$ .

589 *tert-Butyl ((S)-1-(((2R,3S)-1-amino-3-(benzyloxy)-1-oxobutan-2-yl)amino)-4-methyl-*  
590 *1-oxopentan-2-yl)carbamate (37)*

591 Yield 73%. Yellowish solid.  $R_f = 0.8$  (ethyl acetate). Mp. 86–88 °C.  $^1\text{H}$  NMR (200  
592 MHz,  $\text{CDCl}_3$ )  $\delta$  7.31 – 7.22 (m, 5H), 7.20 – 7.11 (m, 1H), 6.26 (s br, 1H), 6.02 (s br,  
593 1H), 5.36 (s br, 2H), 4.54 (s, 2H), 4.56 – 4.53 (m, 1H), 4.33 – 4.28 (m, 1H), 4.16 –  
594 4.11 (m, 1H), 1.76 – 1.48 (m, 3H), 1.48 (s, 9H), 1.11 (d,  $J = 6.4$  Hz, 3H), 0.96 – 0.90  
595 (m, 6H).  $^{13}\text{C}$  NMR (50 MHz,  $\text{CDCl}_3$ )  $\delta$  172.84, 171.86, 155.98, 137.88, 128.29,  
596 127.66, 127.63, 80.38, 73.89, 71.58, 56.40, 54.01, 40.85, 28.12, 24.74, 22.92, 21.62.

597 ESI-MS (+) Calc. for  $[\text{C}_{22}\text{H}_{35}\text{N}_3\text{O}_5]$  421.53, found: 444.5  $[\text{M}+\text{Na}]^+$ .

598 *tert-Butyl ((S)-1-(((2S,3R)-1-amino-3-(benzyloxy)-1-oxobutan-2-yl)amino)-3-(3-*  
599 *chlorophenyl)-1-oxopropan-2-yl)carbamate (38)*

600 Yield 77%. Yellowish solid.  $R_f = 0.6$  (ethyl acetate). Mp. 164–165 °C.  $^1\text{H}$  NMR (200  
601 MHz,  $\text{CD}_3\text{OD}$ )  $\delta$  7.47 – 7.22 (m, 9H), 4.55 – 4.37 (m, 1H), 4.29 – 4.17 (m, 2H), 3.26  
602 (dd,  $J = 13.9, 5.1$  Hz, 1H), 3.07 – 2.96 (m, 1H), 2.92 (s, 2H), 1.44 (s, 9H), 1.27 (d,  $J =$   
603 6.3 Hz, 3H).  $^{13}\text{C}$  NMR (50 MHz,  $\text{CD}_3\text{OD}$ )  $\delta$  172.84, 171.76, 156.24, 138.90, 137.56,  
604 136.39, 130.04, 128.85, 128.28, 127.99, 127.50, 127.44, 126.61, 80.16, 73.89, 71.22,  
605 60.30, 49.00, 37.92, 27.53, 20.19. ESI-MS (+) Calc. for  $[\text{C}_{25}\text{H}_{32}\text{ClN}_3\text{O}_5]$  489.99,  
606 found: 513.1  $[\text{M}+\text{Na}]^+$ .

607

608 **Synthesis of compounds 39-49.** Compounds **39-49** have been synthesized in two  
609 steps from their precursors **28-38**. After removal of the Boc-protecting group (method

610 B), the free amine was coupled to the carboxylic acid following the general  
611 procedure for amide synthesis (method C).

612 *N-((S)-1-(((S)-1-Amino-1-oxo-3-phenylpropan-2-yl)amino)-1-oxo-3-phenylpropan-2-*  
613 *yl)-3-(tert-butyl)-1-methyl-1H-pyrazole-5-carboxamide (39)*

614 Yield 79%. Yellowish solid.  $R_f$  = 0.3 (ethyl acetate). Mp. 109–110 °C.  $^1\text{H}$  NMR (200  
615 MHz,  $\text{CDCl}_3$ )  $\delta$  7.32 – 6.96 (m, 10H), .6.65 (s br, 1H), 6.26 (s, 1H), 6.09 (s br, 1H),  
616 4.68 – 4.58 (m, 2H), 3.81 (s, 3H), 2.87 – 2.74 (m, 4H), 1.11 (s, 9H).  $^{13}\text{C}$  NMR (50  
617 MHz,  $\text{CDCl}_3$ )  $\delta$  173.37, 165.56, 162.46, 160.20, 159.99, 136.34, 136.16, 134.40,  
618 129.13, 128.39, 126.87, 126.81, 124.46, 103.30, 54.93, 53.91, 38.44, 36.34, 31.69,  
619 31.28, 30.27. ESI-MS (+) Calc. for  $[\text{C}_{27}\text{H}_{33}\text{N}_5\text{O}_3]$  475.58, found: 498.7  $[\text{M}+\text{Na}]^+$ .

620 *N-((S)-1-(((R)-1-Amino-1-oxo-3-phenylpropan-2-yl)amino)-1-oxo-3-phenylpropan-2-*  
621 *yl)-3-(tert-butyl)-1-methyl-1H-pyrazole-5-carboxamide (40)*

622 Yield 72%. Yellowish solid.  $R_f$  = 0.4 (ethyl acetate). Mp. 121–122 °C.  $^1\text{H}$  NMR (200  
623 MHz,  $\text{CDCl}_3$ )  $\delta$  7.59 – 7.13 (m, 10H), 6.88 (s, 1H), 6.50 (s, 1H), 6.32 (s br, 1H), 4.92  
624 – 4.82 (m, 2H), 4.04 (s, 3H), 3.10 – 2.91 (m, 4H), 1.34 (s, 9H).  $^{13}\text{C}$  NMR (50 MHz,  
625  $\text{CDCl}_3$ )  $\delta$  172.94, 165.13, 162.04, 159.77, 159.56, 135.92, 135.74, 133.97, 128.70,  
626 127.97, 126.45, 126.38, 124.04, 102.88, 54.50, 53.48, 38.01, 35.91, 31.26, 30.86,  
627 29.84. ESI-MS (+) Calc. for  $[\text{C}_{27}\text{H}_{33}\text{N}_5\text{O}_3]$  475.58, found: 498.7  $[\text{M}+\text{Na}]^+$ .

628 *N-((S)-1-(((S)-1-Amino-4-methyl-1-oxopentan-2-yl)amino)-1-oxo-3-phenylpropan-2-*  
629 *yl)-3-(tert-butyl)-1-methyl-1H-pyrazole-5-carboxamide (41)*

630 Yield 85%. Yellowish solid.  $R_f$  = 0.3 (ethyl acetate). Mp. 152–153 °C.  $^1\text{H}$ -NMR (200  
631 MHz,  $\text{CDCl}_3$ )  $\delta$ . 7.42 – 7.25 (m, 5H), 6.81 (s, 1H), 4.77 – 4.65 (m, 1H), 4.36 – 4.08  
632 (m, 1H), 4.08 (s, 3H), 3.22 – 3.18 (m, 2H), 1.89 – 1.46 (m, 3H), 1.40 (s, 9H), 0.88 –  
633 0.80 (m, 6H).  $^{13}\text{C}$  NMR (50 MHz,  $\text{CDCl}_3$ )  $\delta$  173.57, 168.11, 162.00, 161.25, 137.23,

634 135.94, 130.02, 129.31, 127.64, 104.97, 57.07, 49.00, 38.87, 32.59, 31.75, 30.78,  
635 24.80, 23.57, 21.42. ESI-MS (+) Calc. for [C<sub>24</sub>H<sub>35</sub>N<sub>5</sub>O<sub>3</sub>] 441.57, found: 464.5  
636 [M+Na]<sup>+</sup>.

637 *N*-((*S*)-1-(((*S*)-1-Amino-3-(3-chlorophenyl)-1-oxopropan-2-yl)amino)-1-oxo-3-  
638 phenylpropan-2-yl)-3-(*tert*-butyl)-1-methyl-1*H*-pyrazole-5-carboxamide (**42**)

639 Yield 72%. Yellowish solid. *R*<sub>f</sub> = 0.3 (ethyl acetate). Mp. 131–133 °C. <sup>1</sup>H NMR (200  
640 MHz, CDCl<sub>3</sub>) δ 7.45 – 7.28 (s, 5H), 6.83 (s, 1H), 4.87 – 4.68 (m, 1H), 4.39 – 4.11 (m,  
641 1H), 4.11 (s, 3H), 3.25 – 3.21 (m, 2H), 1.76 – 1.49 (m, 3H), 1.42 (s, 9H), 0.88 – 0.83  
642 (m, 6H). <sup>13</sup>C NMR (50 MHz, CDCl<sub>3</sub>) δ 176.49, 171.02, 164.92, 164.17, 140.15,  
643 138.86, 132.94, 132.23, 130.56, 107.89, 76.35, 59.99, 41.79, 35.51, 34.67, 33.70,  
644 27.72, 26.49, 24.34. ESI-MS (+) Calc. for [C<sub>24</sub>H<sub>35</sub>N<sub>5</sub>O<sub>3</sub>] 441.57, found: 464.5  
645 [M+Na]<sup>+</sup>.

646 *tert*-Butyl ((*S*)-1-(((*S*)-1-amino-3-(3-chlorophenyl)-1-oxopropan-2-yl)amino)-1-oxo-3-  
647 phenylpropan-2-yl)carbamate (**43**)

648 Yield 80%. Yellowish solid. *R*<sub>f</sub> = 0.2 (ethyl acetate). Mp. 101–103 °C. <sup>1</sup>H NMR (200  
649 MHz, CDCl<sub>3</sub>:CD<sub>3</sub>OD 10:1) δ. 7.58 – 6.99 (m, 9H), 6.47 (s, 1H), 4.77 – 4.62 (m, 2H),  
650 4.04 (s, 3H), 3.39 – 2.91 (m, 4H), 1.34 (s, 9H). <sup>13</sup>C NMR (50 MHz, CDCl<sub>3</sub>:CD<sub>3</sub>OD  
651 10:1) δ 172.23, 172.21, 161.25, 161.03, 137.40, 136.96, 135.83, 135.15, 130.68,  
652 129.87, 129.23, 128.42, 128.30, 127.69, 117.62, 104.55, 55.12, 49.00, 42.41, 38.76,  
653 38.62, 32.51, 30.78. ESI-MS (+) Calc. for [C<sub>27</sub>H<sub>32</sub>ClN<sub>5</sub>O<sub>3</sub>] 510.03, found: 532.9  
654 [M+Na]<sup>+</sup>.

655 *N*-((*S*)-1-(((*S*)-1-Amino-1-oxo-3-(pyridin-4-yl)propan-2-yl)amino)-1-oxo-3-  
656 phenylpropan-2-yl)-3-(*tert*-butyl)-1-methyl-1*H*-pyrazole-5-carboxamide (**44**)

657 Yield 66%. Yellowish oil. *R*<sub>f</sub> = 0.2 (ethyl acetate). <sup>1</sup>H NMR (200 MHz, CDCl<sub>3</sub>) δ 8.63  
658 (d, *J* = 5.7 Hz, 2H), 7.58 – 7.30 (m, 7H), 7.36 – 7.13 (m, 7H), 6.59 (s, 1H), 4.84 –

659 4.68 (m, 2H), 3.89 (s, 3H), 3.35 – 3.07 (m, 2H), 1.27 (s, 9H). <sup>13</sup>C NMR (50 MHz,  
660 CDCl<sub>3</sub>) δ 174.42, 173.04, 161.51, 161.12, 149.40, 148.81, 138.04, 136.11, 129.86,  
661 129.09, 127.45, 126.03, 104.55, 55.73, 54.08, 38.35, 37.93, 37.75, 32.45, 30.45.

662 ESI-MS (+) Calc. for [C<sub>26</sub>H<sub>32</sub>N<sub>6</sub>O<sub>3</sub>] 476.57, found:477.3 [M+H]<sup>+</sup>.

663 *N*-((*S*)-1-(((2*S*,3*R*)-1-Amino-3-(benzyloxy)-1-oxobutan-2-yl)amino)-1-oxo-3-  
664 phenylpropan-2-yl)-3-(*tert*-butyl)-1-methyl-1*H*-pyrazole-5-carboxamide (**45**)

665 Yield 65%. Yellowish solid. *R*<sub>f</sub> = 0.3 (ethyl acetate). Mp 109–110 °C. <sup>1</sup>H NMR (200  
666 MHz, CDCl<sub>3</sub>) δ 7.30 – 7.08 (m, 9H), 6.40 (d, *J* = 14.4 Hz, 1H), 6.26 (s, 1H), 5.00 –  
667 4.76 (m, 1H), 4.52 (s, 2H), 4.17 – 4.06 (m, 2H), 3.98 (s, 3H), 3.20 – 3.09 (m, 2H),  
668 1.27 (s, 9H), 1.11 (d, *J* = 6.2 Hz, 3H). <sup>13</sup>C NMR (50 MHz, CDCl<sub>3</sub>) δ 171.79, 171.19,  
669 160.58, 160.20, 137.80, 136.25, 134.62, 129.26, 128.78, 128.44, 127.84, 127.78,  
670 127.21, 103.32, 74.00, 71.58, 60.39, 56.64, 38.86, 38.61, 31.91, 30.49, 21.02. ESI-  
671 MS (+) Calc. for [C<sub>29</sub>H<sub>37</sub>N<sub>5</sub>O<sub>4</sub>] 519.64, found:549.4 [M+Na]<sup>+</sup>.

672 *N*-((*S*)-1-(((2*R*,3*S*)-1-Amino-3-(benzyloxy)-1-oxobutan-2-yl)amino)-1-oxo-3-  
673 phenylpropan-2-yl)-3-(*tert*-butyl)-1-methyl-1*H*-pyrazole-5-carboxamide (**46**)

674 Yield 61%. Yellowish solid. *R*<sub>f</sub> = 0.3 (ethyl acetate). Mp 119–120 °C. <sup>1</sup>H NMR (200  
675 MHz, CDCl<sub>3</sub>) δ 7.27 – 7.04 (m, 9H), 6.37 (d, *J* = 14.4 Hz, 1H), 6.22 (s, 1H), 4.97 –  
676 4.73 (m, 1H), 4.48 (s, 2H), 4.14 – 4.03 (m, 2H), 3.95 (s, 3H), 3.17 – 3.06 (dd, *J* =  
677 11.3, 5.1 Hz, 2H), 1.23 (s, 9H), 1.08 (d, *J* = 6.2 Hz, 3H). <sup>13</sup>C NMR (50 MHz, CDCl<sub>3</sub>) δ  
678 171.79, 171.19, 160.58, 160.20, 137.80, 136.25, 134.62, 129.26, 128.78, 128.44,  
679 127.84, 127.78, 127.21, 103.32, 74.00, 71.58, 60.39, 56.64, 38.86, 38.61, 31.91,  
680 30.49, 21.02. ESI-MS (+) Calc. for [C<sub>29</sub>H<sub>37</sub>N<sub>5</sub>O<sub>4</sub>] 519.64, found: 549.4 [M+Na]<sup>+</sup>.

681 *N*-((*S*)-1-(((2*S*,3*R*)-1-Amino-3-(benzyloxy)-1-oxobutan-2-yl)amino)-4-methyl-1-  
682 oxopentan-2-yl)-3-(*tert*-butyl)-1-methyl-1*H*-pyrazole-5-carboxamide (**47**)

683 Yield 73%. Yellowish solid.  $R_f = 0.3$  (ethyl acetate). Mp 177–178 °C.  $^1\text{H}$  NMR (200  
684 MHz,  $\text{CDCl}_3$ )  $\delta$ . 7.27 – 7.20 (m, 4H), 7.14 (d,  $J = 8.5$  Hz, 1H), 6.42 (s, 1H), 4.85 –  
685 4.82 (m, 1H), 4.62 – 4.52 (s, 2H), 3.96 (s, 3H), 3.87 – 3.84 (m, 1H), 1.69 – 1.59 (m,  
686 3H), 1.22 (s, 9H). 1.18 (d,  $J = 6.3$  Hz, 3H), 0.90 (d,  $J = 6.0$  Hz, 3H), 0.97 (d,  $J = 6.0$   
687 Hz, 3H).  $^{13}\text{C}$  NMR (50 MHz,  $\text{CDCl}_3$ )  $\delta$  172.35, 171.66, 160.37, 160.31, 137.82,  
688 134.69, 128.57, 128.00, 127.74, 103.21, 74.07, 71.71, 56.24, 52.12, 39.03, 38.69,  
689 32.02, 30.59, 25.00, 23.01, 22.0. ESI-MS (+) Calc. for  $[\text{C}_{26}\text{H}_{39}\text{N}_5\text{O}_4]$  485.62, found:  
690 508.5  $[\text{M}+\text{Na}]^+$ .

691 *N-((S)-1-(((2R,3S)-1-Amino-3-(benzyloxy)-1-oxobutan-2-yl)amino)-4-methyl-1-*  
692 *oxopentan-2-yl)-3-(tert-butyl)-1-methyl-1H-pyrazole-5-carboxamide (48)*

693 Yield 70%. Yellowish solid.  $R_f = 0.3$  (ethyl acetate). Mp 170–171 °C.  $^1\text{H}$  NMR (200  
694 MHz,  $\text{CDCl}_3$ )  $\delta$  7.33 – 7.21 (m, 4H), 7.15 (d,  $J = 8.5$  Hz, 1H), 6.34 (s, 1H), 4.85–4.82  
695 (m, 1H), 4.64 – 4.53 (s, 2H), 3.98 (s, 3H), 3.88 – 3.86 (m, 1H), 1.71 – 1.60 (m, 3H),  
696 1.24 (s, 9H), 1.21 (d,  $J = 6.3$  Hz, 3H), 0.91 (d,  $J = 6.0$  Hz, 3H), 0.89 (d,  $J = 6.0$  Hz,  
697 3H).  $^{13}\text{C}$  NMR (50 MHz,  $\text{CDCl}_3$ )  $\delta$  171.72, 171.02, 159.73, 159.68, 137.18, 134.05,  
698 127.94, 127.36, 127.10, 102.58, 73.43, 71.08, 55.60, 51.49, 38.39, 38.06, 31.39,  
699 29.95, 24.37, 22.38, 21.44. ESI-MS (+) Calc. for  $[\text{C}_{26}\text{H}_{39}\text{N}_5\text{O}_4]$  485.62, found: 508.5  
700  $[\text{M}+\text{Na}]^+$ .

701 *N-((S)-1-(((2S,3R)-1-Amino-3-(benzyloxy)-1-oxobutan-2-yl)amino)-3-(3-*  
702 *chlorophenyl)-1-oxopropan-2-yl)-3-(tert-butyl)-1-methyl-1H-pyrazole-5-carboxamide*  
703 *(49)*

704 Yield 65%. Yellowish solid.  $R_f = 0.2$  (ethyl acetate). Mp 102–104 °C.  $^1\text{H}$  NMR (200  
705 MHz,  $\text{CD}_3\text{OD}$ )  $\delta$  8.59 (d,  $J = 7.8$  Hz, 1H), 8.03 (d,  $J = 8.4$  Hz, 1H), 7.26 (dd,  $J = 5.6$ ,  
706 2.2 Hz, 9H), 6.59 (s, 1H), 4.64 – 4.45 (m, 3H), 4.16 – 4.11 (m, 1H), 3.86 (s, 3H), 3.27  
707 – 3.25 (m, 1H), 3.03 (dd,  $J = 14.7$ , 10.8 Hz, 1H), 1.28 (s, 9H), 1.22 (d,  $J = 6.3$  Hz,

708 3H).  $^{13}\text{C}$  NMR (50 MHz,  $\text{CD}_3\text{OD}$ )  $\delta$  174.44, 173.31, 162.05, 161.35, 140.90, 139.31,  
709 136.28, 134.96, 130.78, 130.33, 129.08, 128.62, 128.52, 128.44, 127.71, 104.84,  
710 75.78, 72.24, 58.45, 55.77, 38.46, 37.34, 32.66, 30.66, 16.58. ESI-MS (+) Calc. for  
711  $[\text{C}_{29}\text{H}_{36}\text{N}_5\text{O}_4]$  554.08, found: 577.1  $[\text{M}+\text{Na}]^+$ .

712

713 **Synthesis of compounds 50-60.** Compounds **50-60** have been synthesized by  
714 dehydration of the corresponding primary amide precursor **39-49** with cyanuric  
715 chloride (method A).

716 *3-(tert-Butyl)-N-((S)-1-(((S)-1-cyano-2-phenylethyl)amino)-1-oxo-3-phenylpropan-2-*  
717 *yl)-1-methyl-1H-pyrazole-5-carboxamide (50)*

718 Yield 89%. Yellowish solid.  $R_f$  = 0.6 (ethyl acetate: *n*-hexane; 6:4). Mp. 89 – 90 °C.

719  $^1\text{H}$  NMR (400 MHz,  $\text{CDCl}_3$ )  $\delta$  7.32 – 7.21 (m, 8H), 7.16 (dd,  $J$  = 6.4, 2.8 Hz, 2H), 6.90  
720 (d,  $J$  = 8.2 Hz, 1H), 6.82 (d,  $J$  = 8.2 Hz, 1H), 6.35 (s, 1H), 5.04 – 5.02 (m, 1H), 4.82 –  
721 4.80 (m, 1H), 4.02 (s, 3H), 3.21 – 3.07 (m, 2H), 3.00 – 2.98 (m, 2H), 1.33 – 1.30 (m,  
722 9H).  $^{13}\text{C}$  NMR (100 MHz,  $\text{CDCl}_3$ )  $\delta$  170.30, 160.25, 160.30, 135.55, 134.04, 133.37,  
723 129.08, 129.04, 128.75, 128.72, 127.71, 127.26, 117.25, 103.06, 54.17, 41.48,  
724 38.77, 38.35, 37.95, 31.75, 30.26. FT-IR (KBr,  $\text{cm}^{-1}$ ) 3300.81, 2951.21, 2909.60,  
725 2243.70, 1677.69, 1648.55, 1544.51, 1278.15, 1232.37, 986.82, 751.92, 670.52,  
726 524.68, 424.97. HRMS (+) Calc. for  $[\text{C}_{27}\text{H}_{32}\text{N}_5\text{O}_2]^+$  458.25560, found: 458.2586  
727  $[\text{M}+\text{H}]^+$ . HPLC (protocol A):  $t_R$  (min) = 9.07. Purity 99.0%.

728 *3-(tert-Butyl)-N-((S)-1-(((R)-1-cyano-2-phenylethyl)amino)-1-oxo-3-phenylpropan-2-*  
729 *yl)-1-methyl-1H-pyrazole-5-carboxamide (51)*

730 Yield 92%. Yellowish solid.  $R_f$  = 0.6 (ethyl acetate: *n*-hexane; 6:4). Mp. 98 – 99 °C.

731  $^1\text{H}$  NMR (200 MHz,  $\text{CDCl}_3$ )  $\delta$  7.34 – 7.12 (m, 9H), 6.91 (d,  $J$  = 7.9 Hz, 1H), 6.34 (s,  
732 1H), 5.09 – 5.05 (m, 1H), 4.94 – 4.91 (m, 1H), 4.00 (s, 3H), 3.12 (dd,  $J$  = 13.8, 6.4

733 Hz, 2H), 2.98 (dd,  $J = 13.8, 6.4$  Hz, 2H), 1.30 (s, 9H).  $^{13}\text{C}$  NMR (50 MHz,  $\text{CDCl}_3$ )  $\delta$   
734 170.75, 160.43, 160.33, 135.98, 134.32, 133.78, 129.42, 129.33, 129.01, 128.86,  
735 127.99, 127.42, 118.87, 103.48, 54.38, 41.82, 38.96, 38.48, 38.26, 31.98, 30.51. FT-  
736 IR (KBr,  $\text{cm}^{-1}$ ) 3350.28, 3256.30, 2953.92, 2165.27, 1638.14, 1511.6, 1307.15,  
737 1160.05, 1086.49, 906.70, 820.89, 694.21, 669.69, 543.02. HRMS (+) Calc. for  
738  $[\text{C}_{27}\text{H}_{32}\text{N}_5\text{O}_2]^+$  458.25560, found: 458.2586  $[\text{M}+\text{H}]^+$ . HPLC (protocol A):  $t_{\text{R}}$  (min) =  
739 17.32. Purity 99.3%.

740 *3-(tert-Butyl)-N-((S)-1-(((S)-1-cyano-3-methylbutyl)amino)-1-oxo-3-phenylpropan-2-*  
741 *yl)-1-methyl-1H-pyrazole-5-carboxamide (52)*

742 Yield 84%. Yellowish solid.  $R_f = 0.7$  (ethyl acetate: *n*-hexane; 6:4). Mp 81 – 82 °C.  $^1\text{H}$   
743 NMR (200 MHz,  $\text{CD}_3\text{OD}$ )  $\delta$  7.29 – 7.20 (m, 5H), 6.64 (s, 1H), 4.80 – 4.69 (m, 2H),  
744 3.90 (s, 3H), 3.23 – 2.94 (m, 2H), 1.78 – 1.62 (m, 3H), 1.27 (s, 9H), 0.95 – 0.91 (m,  
745 6H).  $^{13}\text{C}$  NMR (50 MHz,  $\text{CD}_3\text{OD}$ )  $\delta$  173.33, 161.87, 161.51, 138.07, 136.59, 130.36,  
746 129.56, 127.93, 119.68, 105.02, 56.04, 49.00, 42.00, 40.04, 38.69, 32.86, 30.88,  
747 25.80, 22.35, 22.19. FT-IR (KBr,  $\text{cm}^{-1}$ ) 3403.41, 3309.42, 3203.18, 2953.92,  
748 2937.57, 1695.35, 1634.05, 1523.72, 1368.44, 1274.46, 1245.86, 1168.22, 835.58,  
749 702.38, 669.69, 567.54. HRMS (+) Calc. for  $[\text{C}_{24}\text{H}_{34}\text{N}_5\text{O}_2]^+$  423.27125, found:  
750 424.27572  $[\text{M}+\text{H}]^+$ . HPLC (protocol A):  $t_{\text{R}}$  (min)= 9.16. Purity 97.4%.

751 *3-(tert-Butyl)-N-((S)-1-(((S)-1-cyano-3-methylbutyl)amino)-1-oxo-3-phenylpropan-2-*  
752 *yl)-1-methyl-1H-pyrazole-5-carboxamide (53)*

753 Yield 79%. White solid.  $R_f = 0.7$  (ethyl Acetate: *n*-hexane; 6:4). Mp. 91 – 94 °C.  $^1\text{H}$   
754 NMR (200 MHz,  $\text{CDCl}_3$ )  $\delta$  7.32 – 7.21 (m, 3H), 6.98 (d,  $J = 8.2$  Hz, 1H), 6.88 (d,  $J =$   
755 8.2 Hz, 1H), 6.34 (s, 1H), 4.92 – 4.86 (m, 1H), 4.77 – 4.71 (m, 1H), 3.99 (s, 3H), 3.29  
756 – 3.19 (m, 2H), 1.63 – 1.46 (m, 3H), 1.27 (s, 9H), 0.88 (2d,  $J = 5.9$  Hz, 6H).  $^{13}\text{C}$  NMR  
757 (50 MHz,  $\text{CDCl}_3$ )  $\delta$  171.28, 161.15, 161.04, 136.68, 135.04, 129.97, 129.56, 128.05,

758 119.17, 104.16, 55.16, 41.95, 39.62, 39.12, 32.67, 31.19, 25.31, 22.79, 22.53. FT-IR  
759 (KBr,  $\text{cm}^{-1}$ ) 3350.28, 3256.30, 2953.92, 2165.27, 1638.14, 1511.46, 1307.15,  
760 1160.05, 1086.49, 906.70, 820.89, 694.21, 669.69, 543.02. HRMS (+) Calc. for  
761  $[\text{C}_{24}\text{H}_{34}\text{N}_5\text{O}_2]^+$  423.27125, found: 424.27572  $[\text{M}+\text{H}]^+$ . HPLC (protocol A):  $t_{\text{R}}$  (min) =  
762 9.42. Purity 99.1%.

763 *3-(tert-Butyl)-N-((S)-1-(((S)-2-(3-chlorophenyl)-1-cyanoethyl)amino)-1-oxo-3-*  
764 *phenylpropan-2-yl)-1-methyl-1H-pyrazole-5-carboxamide (54)*

765 Yield 50%. Yellowish solid.  $R_f$  = 0.6 (ethyl acetate: *n*-hexane; 6:4). Mp 132 – 133 °C.  
766  $^1\text{H}$  NMR (200 MHz,  $\text{CD}_3\text{OD}/\text{CDCl}_3$ )  $\delta$  7.54 – 7.35 (m, 9H), 6.75 (s, 1H), 5.19 – 5.11  
767 (m, 1H), 4.51 – 4.48 (m, 1H), 4.17 (s, 3H), 3.33 – 3.21 (m, 4H), 1.49 (s, 9H).  $^{13}\text{C}$   
768 NMR (50 MHz,  $\text{CD}_3\text{OD}$ )  $\delta$  172.23, 161.25, 161.03, 137.40, 136.96, 135.83, 135.15,  
769 130.68, 130.07, 129.87, 129.23, 128.42, 128.30, 127.69, 118.18, 104.55, 55.12,  
770 42.41, 38.76, 38.62, 32.51, 30.78. FT-IR ( $\text{cm}^{-1}$ ) 3288.99, 2925.31, 2855.85, 2161.18,  
771 1666.74, 1634.05, 1544.15, 1507.38, 1450.17, 1266.29, 1221.34, 1074.23, 861.75,  
772 747.33, 706.47, 694.21. HRMS (+) Calc. for  $[\text{C}_{27}\text{H}_{31}\text{ClN}_5\text{O}_2]^+$  491.21663, found:  
773 492.21034  $[\text{M}+\text{H}]^+$ . HPLC (protocol A):  $t_{\text{R}}$  (min) = 9.61. Purity > 99.9 %.

774 *3-(tert-Butyl)-N-((S)-1-(((S)-1-cyano-2-(pyridin-4-yl)ethyl)amino)-1-oxo-3-*  
775 *phenylpropan-2-yl)-1-methyl-1H-pyrazole-5-carboxamide (55)*

776 Yield 35%. Yellowish wax.  $R$  = 0.4 (ethyl acetate: *n*-hexane; 6:4).  $^1\text{H}$  NMR (400 MHz,  
777  $\text{CD}_3\text{OD}$ )  $\delta$  8.44 (s br, 2H), 7.38 (d,  $J$  = 5.3 Hz, 2H), 7.30 – 7.22 (m, 5H), 6.63 (s, 1H),  
778 5.14 (t,  $J$  = 7.5 Hz, 1H), 4.66 (dd,  $J$  = 8.6, 6.8 Hz, 1H), 3.94 (s, 3H), 3.26 – 3.13 (m,  
779 4H), 1.30 (s, 9H).  $^{13}\text{C}$  NMR (100 MHz,  $\text{DMSO}-d_6$ )  $\delta$  171.17, 170.90, 159.29, 158.46,  
780 137.89, 136.81, 135.23, 134.81, 129.27, 128.86, 128.13, 127.92, 126.93, 126.34,  
781 118.94, 60.46, 53.87, 53.24, 41.15, 31.39, 30.18, 13.74. FT-IR ( $\text{cm}^{-1}$ ) 3264.47,  
782 2953.92, 2913.05, 2851.76, 2161.43, 1662.66, 1605.45, 1548.24, 1466.62, 1204.99,



783 1115.10, 996.59, 800.45, 735.07, 681.95. HRMS (+) Calc. for  $[C_{26}H_{31}N_6O_2]^+$   
784 459.25085, found: 459.25627  $[M+H]^+$ . HPLC (protocol A):  $t_R$  (min) = 6.84. Purity 98.6  
785 %.

786 *N-((S)-1-(((1R,2R)-2-(Benzyloxy)-1-cyanopropyl)amino)-1-oxo-3-phenylpropan-2-yl)-*  
787 *3-(tert-butyl)-1-methyl-1H-pyrazole-5-carboxamide (56)*

788 Yield 80%. White solid.  $R_f$  = 0.5 (ethyl acetate: *n*-hexane; 6:4). Mp. 115 – 116 °C.  $^1H$ -  
789 NMR (200 MHz,  $CDCl_3$ )  $\delta$  7.35 – 7.26 (m, 10H), 6.95 (d,  $J$  = 8.7 Hz, 1H), 6.61 (d,  $J$  =  
790 7.0 Hz, 1H), 6.30 (s, 1H), 4.88 – 4.85 (m, 2H), 4.62 – 4.58 (m, 1H), 4.03 (s, 3H), 3.82  
791 – 3.78 (m, 1H), 3.29 – 3.24 (m, 2H), 1.31 (s, 9H), 1.03 (d,  $J$  = 6.0 Hz, 3H).  $^{13}C$  NMR  
792 (50 MHz,  $CDCl_3$ )  $\delta$  170.30, 159.83, 159.62, 136.42, 135.27, 133.75, 128.67, 128.41,  
793 128.00, 127.60, 127.30, 126.87, 116.63, 102.65, 72.60, 70.91, 53.85, 44.51, 38.33,  
794 37.60, 31.40, 29.94, 15.29. FT-IR ( $cm^{-1}$ ) 3354.37, 3252.21, 2181.61, 1654.61,  
795 1654.48, 1540.07, 1486.95, 1290.81, 1151.87, 1086.48, 894.44, 808.63, 710.56,  
796 661.32, 543.02. HRMS (+) Calc. for  $[C_{29}H_{36}N_5O_3]^+$  502.28182, found: 502.28095  
797  $[M+H]^+$ . HPLC (protocol A):  $t_R$  (min) = 9.54. Purity 99.4 %.

798 *N-((S)-1-(((1S,2S)-2-(Benzyloxy)-1-cyanopropyl)amino)-1-oxo-3-phenylpropan-2-yl)-*  
799 *3-(tert-butyl)-1-methyl-1H-pyrazole-5-carboxamide (57).*

800 Yield 82%. White solid.  $R_f$  = 0.5 (ethyl acetate: *n*-hexane; 6:4). Mp. 123 – 124 °C.  $^1H$   
801 NMR (200 MHz,  $CDCl_3$ )  $\delta$  7.36 – 7.25 (m, 10H), 6.98 (d,  $J$  = 8.7 Hz, 1H), 6.65 (d,  $J$  =  
802 7.0 Hz, 1H), 6.32 (s, 1H), 4.91 – 4.83 (m, 2H), 4.63 – 4.60 (m, 1H), 4.05 (s, 3H), 3.80  
803 (s br, 1H), 3.24 – 3.20 (m, 2H), 1.33 (s, 9H), 1.05 (d,  $J$  = 6.0 Hz, 3H).  $^{13}C$  NMR (50  
804 MHz,  $CDCl_3$ )  $\delta$  171.01, 160.54, 160.34, 137.14, 135.98, 134.46, 129.39, 129.12,  
805 128.71, 128.32, 128.02, 127.59, 117.34, 103.37, 72.85, 71.15, 54.56, 45.22, 39.04,  
806 38.32, 32.12, 30.65, 16.00. FT-IR ( $cm^{-1}$ ) 2376.73, 2958.00, 2169.35, 1642.22,  
807 15400.07, 1499.21, 1442.00, 1290.81, 1225.43, 1111.01, 1033.37, 988.42, 743.25,

808 690.12. HRMS (+) Calc. for  $[C_{29}H_{36}N_5O_3]^+$  502.28182, found: 502.28095  $[M+H]^+$ .

809 HPLC (protocol A):  $t_R$  (min) = 9.43. Purity 98.3 %.

810 *N-((S)-1-(((1R,2R)-2-(Benzyloxy)-1-cyanopropyl)amino)-4-methyl-1-oxopentan-2-yl)-*

811 *3-(tert-butyl)-1-methyl-1H-pyrazole-5-carboxamide (58)*

812 Yield 78%. White solid.  $R_f$  = 0.5 (ethyl acetate: *n*-hexane; 6:4). Mp. 96 – 97 °C.  $^1H$

813 NMR (400 MHz, DMSO- $d_6$ )  $\delta$  8.93 (d,  $J$  = 8.1 Hz, 1H), 8.43 (d,  $J$  = 7.6 Hz, 1H), 7.38

814 – 7.29 (m, 5H), 6.88 (s, 1H), 5.07 – 5.04 (m, 1H), 4.64 – 4.61 (m, 2H), 4.59 – 4.56

815 (m, 1H), 3.97 – 3.94 (m, 3H), 3.86 – 3.84 (m, 1H), 1.72 – 1.64 (m, 2H), 1.50 – 1.46

816 (m, 2H), 1.26 – 1.20 (m, 12H), 0.93 (d,  $J$  = 6.3 Hz, 3H), 0.88 (d,  $J$  = 6.5 Hz, 3H).  $^{13}C$

817 NMR (100 MHz, DMSO- $d_6$ )  $\delta$  172.36, 159.56, 158.66, 137.92, 134.92, 128.10,

818 127.53, 127.45, 117.82, 103.73, 73.39, 70.40, 51.05, 44.75, 38.44, 31.53, 30.31,

819 24.25, 22.91, 21.19, 15.69. FT-IR ( $cm^{-1}$ ) 3378.89, 3350.28, 3186.83, 2958.00,

820 2116.43, 1674.91, 1650.40, 1531.90, 1368.44, 1262.20, 1160.05, 1057.89, 1033.37,

821 780.02, 735.07, 649.26, 604.31. HRMS (+) Calc. for  $[C_{26}H_{38}N_5O_3]$  468.29746, found:

822 468.29785  $[M+H]^+$ . HPLC (protocol A):  $t_R$  (min) = 9.61. Purity 98.3 %.

823 *N-((S)-1-(((1S,2S)-2-(Benzyloxy)-1-cyanopropyl)amino)-4-methyl-1-oxopentan-2-yl)-*

824 *3-(tert-butyl)-1-methyl-1H-pyrazole-5-carboxamide (59)*

825 Yield 70%. White solid.  $R_f$  = 0.5 (ethyl acetate: *n*-hexane; 6:4). Mp. 110 – 111 °C.  $^1H$

826 NMR (400 MHz,  $CDCl_3$ )  $\delta$  7.27 – 7.20 (m, 5H), 7.14 (d,  $J$  = 8.5 Hz, 1H), 6.42 (d,  $J$  =

827 7.8 Hz, 1H), 6.33 (s, 1H), 4.85 – 4.82 (m, 1H), 4.62 – 4.52 (m, 3H), 3.96 (s, 3H), 3.87

828 – 3.84 (m, 1H), 1.69 – 1.59 (m, 3H), 1.22 (s, 9H). 1.18 (d,  $J$  = 6.3 Hz, 3H) 1.24 – 1.19

829 (m, 12H), 0.92 – 0.88 (m, 6H).  $^{13}C$  NMR (100 MHz,  $CDCl_3$ )  $\delta$  172.10, 160.65, 160.51,

830 137.21, 134.43, 128.66, 128.23, 127.92, 117.45, 103.16, 73.69, 71.80, 51.75, 45.28,

831 40.81, 38.06, 32.10, 30.62, 25.04, 22.97, 22.13, 16.36. FT-IR ( $cm^{-1}$ ) 3333.94,

832 3284.90, 2962.09, 2868.10, 2255.16, 1647.44, 1540.07, 1507.38, 1442.00, 1274.46,

833 1245.86, 988.42, 739.16, 661.52. HRMS (+) Calc. for [C<sub>26</sub>H<sub>38</sub>N<sub>5</sub>O<sub>3</sub>] 468.29746,  
834 found: 468.29785 [M+H]<sup>+</sup>. HPLC (protocol A): t<sub>R</sub> (min) = 9.56. Purity 96.9%.

835 *N-((S)-1-(((1R,2R)-2-(Benzyloxy)-1-cyanopropyl)amino)-3-(3-chlorophenyl)-1-*

836 *oxopropan-2-yl)-3-(tert-butyl)-1-methyl-1H-pyrazole-5-carboxamide (60)*

837 Yield 50%. Yellowish wax. R<sub>f</sub> = 0.4 (ethyl acetate: *n*-hexane; 6:4). <sup>1</sup>H NMR (400

838 MHz, CDCl<sub>3</sub>) δ 7.30 – 7.13 (m, 6H), 7.04 (dt, *J* = 7.0, 1.7 Hz, 1H), 6.62 (dd, *J* = 17.8,

839 8.2 Hz, 2H), 6.25 (s, 1H), 4.77 – 4.71 (m, 2H), 4.48 (dd, *J* = 36.1, 11.7 Hz, 2H), 3.95

840 (s, 3H), 3.82 – 3.74 (m, 1H), 3.11 – 3.00 (m, 2H), 1.20 (s, 9H), 1.08 (d, *J* = 6.3 Hz,

841 3H). <sup>13</sup>C NMR (100 MHz, CDCl<sub>3</sub>) δ 170.73, 160.54, 160.12, 137.80, 136.91, 134.84,

842 134.30, 130.44, 129.51, 128.71, 128.34, 128.03, 127.84, 127.62, 117.06, 103.35,

843 73.35, 71.72, 54.28, 45.07, 39.06, 38.13, 32.07, 30.58, 16.21. FT-IR (cm<sup>-1</sup>) 3357.24,

844 3264.21, 2193.15, 1654.33, 1538.29, 1487.88, 1209.18, 1141.78, 1036.43, 863.33,

845 807.36, 701.44, 658.23, 534.57. ESI-MS (+) Calc. for [C<sub>29</sub>H<sub>34</sub>ClN<sub>5</sub>O<sub>3</sub>] 536.24284,

846 found: 536.24235 [M+H]<sup>+</sup>. HPLC (protocol B): t<sub>R</sub> (min) = 12.06. Purity 96.5%.

847

848 **Synthesis of compounds 61-64.** Compounds **61-64** have been synthesized from

849 compounds **34-37** by removal of the benzyl group through hydrogenation on Pd/C

850 (method A).

851 *N-((S)-1-(((2S,3R)-1-Amino-3-hydroxy-1-oxobutan-2-yl)amino)-1-oxo-3-*

852 *phenylpropan-2-yl)-3-(tert-butyl)-1-methyl-1H-pyrazole-5-carboxamide. (61)*

853 Yield 92%. Colorless wax. R<sub>f</sub> = 0.2 (ethyl acetate). <sup>1</sup>H NMR (200 MHz, CDCl<sub>3</sub>) δ 8.03

854 (s, 1H), 7.36 – 6.94 (m, 5H), 6.54 (s, 1H), 4.44 – 4.39 (m, 2H), 4.03 – 4.01 (m, 1H),

855 3.96 (s, 3H), 3.18 – 3.14 (m, 1H), 2.87 (s, 1H), 1.30 (s, 9H), 1.03 – 1.01 (m, 3H). <sup>13</sup>C

856 NMR (50 MHz, CDCl<sub>3</sub>) δ 173.54, 172.15, 161.25, 160.35, 136.25, 135.98, 134.58,

857 129.36, 128.76, 127.25, 66.60, 58.51, 55.55, 54.30, 38.70, 31.98, 30.51, 18.92. ESI-  
858 MS (+) Calc. for [C<sub>22</sub>H<sub>31</sub>N<sub>5</sub>O<sub>4</sub>] 429.51, found:452.4 [M+Na]<sup>+</sup>.

859 *N-((S)-1-(((2R,3S)-1-Amino-3-hydroxy-1-oxobutan-2-yl)amino)-1-oxo-3-*  
860 *phenylpropan-2-yl)-3-(tert-butyl)-1-methyl-1H-pyrazole-5-carboxamide. (62)*

861 Yield 95%. Colorless wax. *R*<sub>f</sub> = 0.2 (ethyl acetate). <sup>1</sup>H NMR (200 MHz, CDCl<sub>3</sub>) δ 8.01  
862 (s, 1H), 7.36 – 6.98 (m, 5H), 6.59 (s, 1H), 4.42 – 4.36 (m, 2H), 4.04 – 4.01 (m, 1H),  
863 3.96 (s, 3H), 3.12 – 3.09 (m, 1H), 2.89 (s, 1H), 1.33 (s, 9H), 1.03 – 0.99 (m, 3H). <sup>13</sup>C  
864 NMR (50 MHz, CDCl<sub>3</sub>) δ 173.54, 172.15, 161.25, 160.35, 136.25, 135.98, 134.58,  
865 129.36, 128.76, 127.25, 66.60, 58.51, 55.55, 54.30, 38.70, 31.98, 30.51, 18.92. ESI-  
866 MS (+) Calc. for [C<sub>22</sub>H<sub>31</sub>N<sub>5</sub>O<sub>4</sub>] 429.51, found: 452.4 [M+Na]<sup>+</sup>.

867 *N-((S)-1-(((2S,3R)-1-Amino-3-hydroxy-1-oxobutan-2-yl)amino)-4-methyl-1-*  
868 *oxopentan-2-yl)-3-(tert-butyl)-1-methyl-1H-pyrazole-5-carboxamide(63)*

869 Yield 90%. Colorless wax. *R*<sub>f</sub> = 0.2 (ethyl acetate). <sup>1</sup>H NMR (200 MHz, CDCl<sub>3</sub>) δ 7.37  
870 (d, *J* = 3.9 Hz, 1H), 6.74 – 6.71 (m, 2H), 6.42 (s, 1H), 4.71 – 4.68 (m, 1H), 4.42 –  
871 4.38 (m, 2H), 4.06 (s, 3H), 1.71 – 1.68 (m, 3H), 1.27 (s, 9H), 1.14 – 1.11 (m, 3H),  
872 0.98 – 0.92 (m, 6H). ESI-MS (+) Calc. for [C<sub>19</sub>H<sub>33</sub>N<sub>5</sub>O<sub>4</sub>] 395.51, found: 418.5  
873 [M+Na]<sup>+</sup>.

874 *N-((S)-1-(((2R,3S)-1-Amino-3-hydroxy-1-oxobutan-2-yl)amino)-4-methyl-1-*  
875 *oxopentan-2-yl)-3-(tert-butyl)-1-methyl-1H-pyrazole-5-carboxamide (64)*

876 Yield 93%. Colorless wax. *R*<sub>f</sub> = 0.2 (ethyl acetate). <sup>1</sup>H NMR (200 MHz, CDCl<sub>3</sub>) δ 7.34  
877 (d, *J* = 3.9 Hz, 1H), 6.79 – 6.75 (m, 2H), 6.46 (s, 1H), 4.73 – 4.70(m, 1H), 4.45 – 4.41  
878 (m, 2H), 4.11 (s, 3H), 1.77 – 1.74 (m, 3H), 1.28 (s, 9H), 1.19 – 1.17 (m, 3H), 0.99 –  
879 0.91 (m, 6H). ESI-MS (+) Calc. for [C<sub>19</sub>H<sub>33</sub>N<sub>5</sub>O<sub>4</sub>] 395.51, found: 418.5 [M+Na]<sup>+</sup>.

880

881 **Synthesis of compounds 65-68.** Compounds **65-68** have been synthesized by  
882 dehydration of the corresponding primary amide precursor **61-64** with trifluoroacetic  
883 anhydride (method B).

884 *3-(tert-Butyl)-N-((S)-1-(((1R,2R)-1-cyano-2-hydroxypropyl)amino)-1-oxo-3-*  
885 *phenylpropan-2-yl)-1-methyl-1H-pyrazole-5-carboxamide (65)*

886 Yield 45%. White solid.  $R_f = 0.7$ (ethyl acetate). Mp. 159 – 160 °C.  $^1\text{H}$  NMR (500  
887 MHz,  $\text{CDCl}_3$ )  $\delta$  7.32 – 7.26 (m, 4H), 7.26 – 7.21 (m, 1H), 6.65 (s, 1H), 4.84 – 4.79  
888 (m, 2H), 3.96 (s, 3H), 3.88 – 3.84 (m, 1H), 3.20 (dd,  $J = 13.6, 7.1$  Hz, 1H), 3.10 (dd,  $J$   
889 = 13.6, 7.1 Hz, 1H), 1.31 (s, 9H), 1.07 (d,  $J = 6.3$  Hz, 3H).  $^{13}\text{C}$  NMR (125 MHz,  
890  $\text{CDCl}_3$ )  $\delta$  173.35, 162.06, 161.60, 138.15, 136.69, 130.42, 129.57, 127.98, 118.24,  
891 105.04, 67.67, 56.05, 38.86, 38.68, 32.90, 30.87, 18.89, 18.55. FT-IR (KBr,  $\text{cm}^{-1}$ )  
892 3293.08, 2953.92, 2913.05, 2868.10, 1646.10, 1540.07, 1446.08, 1286.72, 1237.68,  
893 1098.75, 922.51, 739.16, 689.30, 469.47. HRMS (+) Calc. for  $[\text{C}_{22}\text{H}_{30}\text{N}_5\text{O}_3]^+$   
894 412.23486, found: 412.23811  $[\text{M}+\text{H}]^+$ . HPLC (protocol A):  $t_R$  (min) = 7.65. Purity  
895 97.8%.

896 *3-(tert-Butyl)-N-((S)-1-(((1S,2S)-1-cyano-2-hydroxypropyl)amino)-1-oxo-3-*  
897 *phenylpropan-2-yl)-1-methyl-1H-pyrazole-5-carboxamide (66)*

898 Yield 42%. White solid.  $R_f = 0.7$  (ethyl acetate). Mp. 145 – 147 °C.  $^1\text{H}$  NMR (400  
899 MHz,  $\text{CDCl}_3$ )  $\delta$  7.31 – 7.23 (m, 5H), 7.07 (d,  $J = 8.0$  Hz, 1H), 6.67 (d,  $J = 7.5$  Hz, 1H),  
900 6.31 (s, 1H), 4.85 – 4.84 (m, 1H), 4.72 – 4.68 (m, 1H), 4.15 – 4.10 (m, 1H), 4.02 (s,  
901 3H), 3.21 – 3.15 (m, 2H), 1.29 – 1.27 (m, 9H), 1.08 (d,  $J = 6.2$  Hz, 3H).  $^{13}\text{C}$  NMR  
902 (100 MHz,  $\text{CDCl}_3$ )  $\delta$  172.41, 171.26, 160.58, 135.89, 134.27, 129.38, 129.14,  
903 127.65, 117.25, 103.52, 67.39, 54.76, 47.02, 39.11, 38.38, 32.09, 30.59, 19.02. FT-  
904 IR (KBr,  $\text{cm}^{-1}$ ) 3289.11, 2955.43, 2918.55, 2860.11, 1649.54, 1543.16, 1444.02,

905 1277.62, 1233.66, 1091.87, 944.77, 745.55, 690.34, 477.11. HRMS (+) Calc. for  
906  $[C_{22}H_{30}N_5O_3]^+$  412.23486, found: 412.23811  $[M+H]^+$ . HPLC (protocol A):  $t_R$  (min) =  
907 7.71. Purity 95.7%.

908 *3-(tert-Butyl)-N-((S)-1-(((1R,2R)-1-cyano-2-hydroxypropyl)amino)-4-methyl-1-*  
909 *oxopentan-2-yl)-1-methyl-1H-pyrazole-5-carboxamide (67)*

910 Yield 33%. White solid.  $R_f$  = 0.5 (ethyl acetate). Mp. 118 – 119 °C.  $^1H$  NMR (400  
911 MHz,  $CDCl_3$ )  $\delta$  7.56 – 7.51 (m, 1H), 6.80 – 6.75 (m, 1H), 6.43 (s, 1H), 4.87 – 4.83  
912 (m, 1H), 4.65 – 4.63 (m, 1H), 4.15 – 4.11 (m, 1H), 4.06 (s, 3H), 1.31 – 1.20 (m, 15H),  
913 0.97 (2d,  $J$  = 6.2 Hz, 3H).  $^{13}C$  NMR (100 MHz,  $CDCl_3$ )  $\delta$  174.32, 161.62, 162.14,  
914 135.77, 117.22, 104.56, 67.34, 52.68, 41.12, 38.28, 31.46, 32.15, 26.11, 23.56,  
915 21.65, 19.03. FT-IR (KBr,  $cm^{-1}$ ) 3297.16, 2953.92, 2913.05, 2868.10, 1646.31,  
916 1535.89, 1503.29, 1462.52, 1364.36, 1282.63, 1172.38, 1131.44, 996.59, 730.99,  
917 592.05. HRMS (+) Calc. for  $[C_{19}H_{32}N_5O_3]^+$  378.25071, found: 378.25231  
918  $[M+H]^+$ . HPLC (protocol A):  $t_R$  (min) = 8.08. Purity: 96.7%.

919 *3-(tert-Butyl)-N-((S)-1-(((1S,2S)-1-cyano-2-hydroxypropyl)amino)-4-methyl-1-*  
920 *oxopentan-2-yl)-1-methyl-1H-pyrazole-5-carboxamide (68)*

921 Yield 35%. White solid.  $R_f$  = 0.5 (ethyl acetate). Mp. 111 – 113 °C.  $^1H$  NMR (400  
922 MHz,  $CD_3OD$ )  $\delta$  6.78 (s, 1H), 4.88 – 4.84 (m, 1H), 4.65 – 4.60 (m, 1H), 4.07 – 4.05  
923 (m, 1H), 4.05 (s, 3H), 1.81 – 1.61 (m, 4H), 1.32 (s, 9H), 1.26 (d,  $J$  = 6.3 Hz, 3H), 1.00  
924 (2d,  $J$  = 6.3 Hz, 6H).  $^{13}C$  NMR (100 MHz,  $CD_3OD$ )  $\delta$  175.01, 162.46, 161.76, 136.76,  
925 118.59, 105.26, 68.00, 53.28, 41.76, 39.00, 33.07, 31.04, 26.27, 23.54, 21.94, 19.44.  
926 FT-IR (KBr,  $cm^{-1}$ ) 3293.08, 2962.09, 2917.14, 2847.67, 1646.31, 1540.07, 1458.34,  
927 1278.55, 1131.44, 1078.32, 1000.68, 853.58, 812.71, 780.02, 730.99, 559.36.  
928 HRMS (+) Calc. for  $[C_{19}H_{32}N_5O_3]^+$  378.25071, found: 378.25231  $[M+H]^+$ . HPLC  
929 (protocol A):  $t_R$  (min) = 7.94. Purity: 98.6%.

930 **Synthesis of compound 69.** Compound **69** has been synthesized by removal of the  
931 benzyl group from compound **60** with DDQ (method B).

932 *3-(tert-butyl)-N-((S)-3-(3-chlorophenyl)-1-(((1R,2R)-1-cyano-2-hydroxypropyl)amino)-*  
933 *1-oxopropan-2-yl)-1-methyl-1H-pyrazole-5-carboxamide (69)*

934 Yield 32%. White solid.  $R_f$  = 0.3 (ethyl acetate). Mp. 102 – 103 °C.  $^1\text{H}$  NMR (400  
935 MHz,  $\text{CD}_3\text{OD}$ )  $\delta$  7.35 – 7.28 (m, 4H), 6.69 (s, 1H), 4.87 – 4.83 (m, 2H), 3.99 (s, 3H),  
936 3.90 – 3.84 (m, 1H), 3.24 (dd,  $J$  = 13.6, 7.1 Hz, 1H), 3.08 (dd,  $J$  = 13.6, 6.5 Hz, 1H),  
937 1.34 (s, 9H), 1.11 (d,  $J$  = 6.3 Hz, 3H).  $^{13}\text{C}$  NMR (100 MHz,  $\text{CD}_3\text{OD}$ )  $\delta$  175.23, 163.23,  
938 151.94, 151.48, 128.04, 126.57, 120.30, 120.10, 119.52, 119.45, 117.86, 108.12,  
939 94.92, 57.55, 45.93, 28.74, 28.56, 22.78, 20.75, 18.78. FT-IR (KBr,  $\text{cm}^{-1}$ ) 3284.90,  
940 3056.07, 2958.00, 2925.31, 2868.10, 1638.14, 1556.41, 1499.21, 1462.43, 1364.36,  
941 1270.37, 1229.51, 1098.75, 878.09, 730.99, 702.38, 453.12. ESI-MS (+) Calc. for  
942  $[\text{C}_{22}\text{H}_{29}\text{ClN}_5\text{O}_3]^+$  446.19589, found: 446.19745  $[\text{M}+\text{H}]^+$ . HPLC (protocol A):  $t_R$  (min) =  
943 8.55. Purity 99.7%.

#### 944 **Enzyme inhibition studies**

945 Enzyme inhibition studies for Cz and LmCPB were performed as previously  
946 described for Cz [14]. Cathepsins B, L, S were assayed as reported [17,18].

947 Cathepsin K assay. Human recombinant cathepsin K was assayed on a FLUOSTAR  
948 Optima plate reader at 25 °C with an excitation wavelength of 360 nm and an  
949 emission wavelength of 440 nm on a 96 well plate. The enzyme solution (23  $\mu\text{g}/\text{mL}$   
950 in 50 mM sodium acetate pH 5.5, 50 mM NaCl, 0.5 mM EDTA, 5 mM DTT) was  
951 diluted 1:100 with assay buffer (100 mM sodium citrate buffer pH 5.0, 100 mM NaCl,  
952 1 mM EDTA, 0.01% CHAPS) containing 5 mM DTT and was then incubated at 37 °C

953 for 30 min for activation. A 1.5 mM stock solution of the substrate Z-Leu-Arg-AMC  
954 was prepared in DMSO. The final substrate concentration was 6  $\mu\text{M}$  ( $= 3.05 \times K_m$ ).  
955 The assay was performed with a final concentration of cathepsin K of 1.73 ng/mL.  
956 Stock solutions of inhibitors were prepared in DMSO. The final DMSO concentration  
957 was 2% (4  $\mu\text{L}$ ). Into a well containing 194.5  $\mu\text{L}$  assay buffer, 0.8  $\mu\text{L}$  of the fluorogenic  
958 substrate, DMSO and inhibitor solution (3.2  $\mu\text{L}$ ) were added. Upon addition of  
959 cathepsin K (1.5  $\mu\text{L}$ ), the measurement was started and followed for 20 min.

960 **In vitro trypanocidal activity evaluation on intracellular amastigote forms**  
961 **(Tulahuen strain).**

962 Cells were analyzed in 96-well plates, cells from the LLCMK<sub>2</sub> strain were plated at a  
963 concentration of  $5 \times 10^4$  cells/mL. Trypomastigote forms of the Tulahuen LacZ strain  
964 were added at a concentration of  $5 \times 10^5$  parasites mL<sup>-1</sup> and placed in the incubator at  
965 37 °C with 5% CO<sub>2</sub> for 48 hours. After the incubation period, the trypomastigote  
966 forms present were removed by successive washes with PBS, remaining only as  
967 intracellular amastigote forms. Compounds were added at different concentrations  
968 (1.95  $\mu\text{M}$  to 250  $\mu\text{M}$  serial dilutions) and incubated for 72 hours. At the end of this  
969 period, the substrate CPRG (chlorophenol red  $\beta$ -D-galactopyranoside, 400  $\mu\text{M}$  in  
970 0.3% Triton X-100, pH 7.4) was added. After 4 hours of incubation at 37 °C, the  
971 plates were analyzed in a spectrophotometer at 570 nm to obtain the effective  
972 concentration (EC<sub>50</sub>) to reduce the parasitemia inside the host cell. Benznidazole  
973 was used as a positive control in the same concentrations as the substances, and  
974 DMSO as a negative control. Compounds were solubilized in DMSO. The same  
975 assay condition was performed to determine the cytotoxic concentration data (CC<sub>50</sub>)  
976 using the non-infected host cells. The selectivity index (SI) was calculated using the



977 formula:  $SI = EC_{50}/CC_{50}$ . All statistical analyses were done with the program  
978 GraphPad Prism v.5.

## 979 **Results**

### 980 **Structure-based design, modelling studies, and compound synthesis**

981 Cz, the recombinant form of cruzipain is a monomeric enzyme, composed of two  
982 folded and equally sized domains. These domains are divided by the enzyme's  
983 active site, which is V-shaped and largely exposed to solvent. A catalytic triad  
984 cysteine-histidine-asparagine forms the active site [13]. The main polar interactions  
985 between the protein and inhibitor are well conserved involving the residues Gln19,  
986 Gly66, Asp161, His162, and Trp184 of the enzyme. Cz is a cathepsin L-like cysteine  
987 protease and is closely related to the mammalian CPs such as CatB, CatK, CatL,  
988 and CatS.

989 A variety of studies have been conducted on optimization strategies for the  
990 interactions of different classes of inhibitors with the S1, S2 and S3 binding sites of  
991 cruzain and related cysteine proteases [13,14,19,20]. Nonetheless, far less is known  
992 about the attainable interactions at S1' for dipeptidyl nitrile inhibitors [21]. The high-  
993 resolution crystal structure of cruzain shows that there is a large open surface  
994 characterized by Trp177 in the primed binding site region (Fig 3) [22]. The design of  
995 compounds to exploit this cavity would provide enhanced enzyme-inhibitor  
996 interactions. This concept has been already applied for a class of different dipeptidic  
997 vinyl sulfone inhibitors [23]. As Fig 3 (left) exemplarily illustrates, the substituents of  
998 vinyl sulfone inhibitors predominantly sit on top of the shelf formed by residues  
999 Ser139, Met142 and Asp158 rather than adopting an orientation for a strong  
1000 aromatic–aromatic interactions with Trp177. The nitrile inhibitor 33L does not bear an

1001 appropriate substituent that would allow for an interaction with the primed binding  
1002 region of cruzain (Fig 3, right).

1003

1004 **Fig 3. Crystal structures of vinyl sulfone derivative K777 and dipeptidyl nitrile**  
1005 **33L covalently bound to cruzain.**

1006 Left picture, PDB-ID: 1F2B; right picture, PDB-ID 4QH6.

1007

1008 The nitrile warhead has been applied successfully for a variety of series of cathepsin  
1009 inhibitors. Peptidic nitriles are known to interact with the active site cysteine by  
1010 forming a covalent, but reversible thioimidate adduct [24]. The nitrile warhead was  
1011 also repurposed for Cz inhibition as trypanocidal agents, displaying low toxicity,  
1012 probably due to the reversible character of interaction [25]. Therefore, starting from  
1013 our recent study on dipeptidyl nitriles as trypanocidal agents, we expanded our  
1014 previous inhibitor series to map the S1/S1' subsites of Cz [13]. By applying a  
1015 knowledge-based design approach, we have explored different amino acids as  
1016 possible building blocks for the P1 moiety. Based on a template crystal structure of  
1017 the dipeptidyl nitrile inhibitor 33L bound to Cz (PDB ID: 4QH6), structural  
1018 modifications have been executed that might increase the affinity towards the S1'  
1019 specificity pocket. Fig 4 shows dipeptidyl nitriles **50**, **52**, **56**, and **58** with different  
1020 lipophilic substitution patterns at the P1 position, which were assumed to  
1021 accommodate the S1' pocket through hydrophobic interactions without interfering in  
1022 the general mode of binding.

1023

1024 **Fig 4. The putative orientation of P1 moieties in compounds 50, 52, 56, and 58.**

1025 Possible interactions with residues forming pockets S1 and S1' (PDB ID: 4QH6).

1026

1027

1028 Compound **9** (Fig 5, Fig 6) was adopted as an archetype, with the cyclopropyl group  
1029 at P1 position and phenylalanine as well as a pyrazole moiety for advantageous  
1030 interactions with the non-primed binding region of the target protease. We mainly  
1031 used different natural and unnatural amino acids for the P1 moiety and maintained  
1032 the nitrile warhead. Leucine (Leu) and phenylalanine (Phe) were incorporated  
1033 (compounds **50** – **54**, Fig 6) as molecular sensors for aliphatic and aromatic  
1034 interactions. 4-Pyridylalanine was implemented to leverage the affinity by polar  
1035 interaction with Asp161. Thr-O-Bzl, an unusual building block for peptide inhibitors,  
1036 was used as chimera for aliphatic and aromatic interactions. After removal of the  
1037 benzyl protecting group from Thr-O-Bzl, the so produced alcoholic moiety should  
1038 allow to evaluating whether a hydrogen bond donor is tolerated in the S1/S1' area.  
1039 Moreover, it was intended to investigate how the stereochemistry in this region will  
1040 influence the affinity with Cz.

1041

1042 **Fig 5. Structure representation of compounds 6-19.**

1043

1044 **Fig 6. Structure of compounds 50-60 and 65-69.**

1045

1046 3-(*tert*-Butyl)-1-methyl-1*H*-pyrazole-5-carboxylic acid is a privileged building block  
1047 applied for the inhibition of Cz and CatL [26]. Thus, we have explored some possible  
1048 bioisosteres in order to increase the affinity and the selectivity towards Cz, such as  
1049 7-chloroquinoline carboxylic acid, 1*H*-indole-5-carboxylic acid, or 6-aminonicotinic  
1050 acid.

1051 Accordingly, we synthesized a new series of dipeptidyl nitriles (Fig 1, Fig 2). For  
1052 compounds **6-12** and **14-19** bearing a cyclopropyl moiety in P1, the synthesis was  
1053 carried out as known from the literature [14]. The peptide coupling reaction was  
1054 performed twice; first to connect the enantiomerically pure, Boc-protected P2 amino  
1055 acid with the aminonitrile moiety, and secondly, after removing the Boc group, to  
1056 introduce the corresponding aroyl acids (Fig 1). Compound **19** was synthesized from  
1057 compound **12** by removing the benzyl group under mild oxidative conditions (Fig 1)  
1058 [27].

1059 For the synthesis of compounds **50-60** (Fig. 6), we have adopted a different synthetic  
1060 strategy. In general, the desired dipeptidyl primary amide was synthesized, followed  
1061 by the dehydration reaction to form the dipeptidyl nitrile. Due to the diversity of  
1062 building blocks, it was necessary to evaluate different dehydrating reagents, aiming  
1063 at the best yield and prevention of racemization. For compounds **65-68** the cleavage  
1064 of the benzyl group was performed by hydrogenolysis before the conversion of the  
1065 primary amide to the nitrile, while for compound **69**, considering the lability of the  
1066 chlorine atom under hydrogenolysis, we first transformed the primary amide to the  
1067 nitrile and then removed the benzyl group under mild oxidative conditions [27]. The  
1068 absolute geometry of the P1 group did not change, but, owing to CIP priority rules,  
1069 the configuration at the  $\alpha$ -carbon for the Thr-O-Bzl building block changed two  
1070 times: (i) in the dehydration step to form the nitrile group and, (ii) when the catalytic  
1071 cysteine attacks the carbon atom of the nitrile warhead to form a covalent bond (Fig  
1072 7).

1073

1074 **Fig 7. Change in stereochemistry for compounds bearing Thr or Thr-O-Bzl**  
1075 **group in P1.**

1076

1077 **Structure-activity relationships for inhibition of cysteine proteases by**  
 1078 **dipeptidyl nitriles**

1079

1080 The  $pK_i$  values were determined for parasite cysteine proteases (Cz, LmCPB) and  
 1081 also for human cysteine cathepsins (CatB, CatK, CatL, CatS) and are reported in  
 1082 Table 1. Compounds **6**, **8**, **9** and **11** have already been described as competitive  
 1083 inhibitors that bind reversibly to Cz [13]. Some of the compounds are Cz nanomolar  
 1084 inhibitors and also exhibit good affinity for LmCPB, CatL, and CatK. The application  
 1085 of such inhibitors extends to candidates for antiprotozoal action and also as inhibitors  
 1086 of cysteine cathepsins of human host cells in various pathological conditions.

1087

1088

1089 **Table 1. Structures representation, number identification,  $pK_i$  values for CatB,**  
 1090 **CatK, CatL, CatS, Cz and LmCPB.**

| Cmpd.     | $pK_i$ values or remaining activity (%) at 10 $\mu\text{M}^{\text{a,b}}$ |                   |      |      |     |       |
|-----------|--------------------------------------------------------------------------|-------------------|------|------|-----|-------|
|           | CatB                                                                     | CatK              | CatL | CatS | Cz  | LmCPB |
| <b>6</b>  | 73% <sup>b</sup>                                                         | 6.4               | 7.4  | 7.1  | 6.6 | 6.6   |
| <b>7</b>  | 5.5                                                                      | 6.2               | 7.3  | 7.7  | 6.9 | 6.2   |
| <b>8</b>  | 5.4                                                                      | 6.4               | 8.6  | 6.7  | 7.4 | 6.7   |
| <b>9</b>  | 4.8                                                                      | 6.5               | 8.2  | 6.8  | 7.3 | 7.1   |
| <b>10</b> | 93% <sup>b</sup>                                                         | 5.0               | 7.6  | 5.6  | 6.6 | 6.4   |
| <b>11</b> | 4.5                                                                      | 8.3               | 7.6  | 7.4  | 7.8 | 7.3   |
| <b>12</b> | 4.4                                                                      | 96% <sup>b</sup>  | 5.9  | 5.9  | 5.1 | 5.5   |
| <b>13</b> | 4.9                                                                      | 81% <sup>b</sup>  | 7.2  | 6.7  | 6.7 | 6.9   |
| <b>14</b> | 89% <sup>b</sup>                                                         | 6.9               | 6.6  | 6.9  | 7.8 | 7.3   |
| <b>15</b> | 4.7                                                                      | n.i. <sup>c</sup> | 5.7  | 6.0  | 6.2 | 5.7   |
| <b>16</b> | 5.2                                                                      | 6.2               | 6.3  | 7.3  | 6.9 | 7.0   |
| <b>17</b> | n.i. <sup>c</sup>                                                        | 8.0               | 6.5  | 7.6  | 7.1 | 6.8   |
| <b>18</b> | 4.5                                                                      | 8.7               | 7.1  | 7.3  | 7.7 | 7.2   |

|           |                   |                   |                  |                   |                  |                  |
|-----------|-------------------|-------------------|------------------|-------------------|------------------|------------------|
| <b>19</b> | 4.6               | 5.5               | 5.2              | 5.0               | 51% <sup>b</sup> | 67% <sup>b</sup> |
| <b>50</b> | 4.5               | 6.3               | 8.5              | 7.3               | 7.7              | 7.8              |
| <b>51</b> | 94% <sup>b</sup>  | 5.6               | 6.9              | 5.9               | 6.3              | 6.1              |
| <b>52</b> | 5.1               | 6.7               | 8.3              | 6.9               | 7.5              | 7.4              |
| <b>53</b> | 90% <sup>b</sup>  | 6.0               | 7.0              | 6.0               | 6.5              | 6.4              |
| <b>54</b> | 4.9               | 6.3               | 8.3              | 7.1               | 7.5              | 7.5              |
| <b>55</b> | 4.8               | 6.5               | 8.3              | 7.2               | 7.5              | 7.2              |
| <b>56</b> | 5.2               | 5.7               | 7.0              | 6.0               | 6.3              | 6.5              |
| <b>57</b> | n.i. <sup>c</sup> | 97% <sup>b</sup>  | 85% <sup>b</sup> | n.i. <sup>c</sup> | 75% <sup>b</sup> | 72% <sup>b</sup> |
| <b>58</b> | 5.1               | 7.8               | 7.2              | 7.3               | 7.9              | 7.7              |
| <b>59</b> | n.i. <sup>c</sup> | n.i. <sup>c</sup> | 90% <sup>b</sup> | 85% <sup>b</sup>  | 60% <sup>b</sup> | 75% <sup>b</sup> |
| <b>60</b> | 6.3               | 6.0               | 8.1              | 6.5               | 7.2              | 6.8              |
| <b>65</b> | 92% <sup>b</sup>  | 86% <sup>b</sup>  | 5.3              | 5.3               | 68% <sup>b</sup> | 69% <sup>b</sup> |
| <b>66</b> | 89% <sup>b</sup>  | 81% <sup>b</sup>  | 5.6              | 4.7               | 5.4              | 4.8              |
| <b>67</b> | 92% <sup>b</sup>  | 7.8               | 7.0              | 5.0               | 7.1              | 6.7              |
| <b>68</b> | 93% <sup>b</sup>  | 5.1               | 88% <sup>b</sup> | 83% <sup>b</sup>  | 5.4              | 54% <sup>b</sup> |
| <b>69</b> | 5.2               | 6.1               | 8.2              | 6.6               | 6.9              | 6.0              |

1091 <sup>a</sup> The standard deviation was lower than 15% for all reported  $pK_i$  values. <sup>b</sup> Percentage of remaining  
 1092 activity at 10  $\mu$ M, n = 2. <sup>c</sup> n.i. = no inhibition observed at 10  $\mu$ M.

1093

1094 One important question is the cross-reactivity of CP inhibitors, for which an  
 1095 extrathermodynamic relationships can be formulated [28,29]. The nature of the  
 1096 ligand-target interaction governed by the thermodynamic parameter of the free  
 1097 energy change (via the estimation of the dissociation constant) results in respective  
 1098 extrathermodynamic relationships for a set of derivatives. So, we investigated the  
 1099 degree of linear correlation between Cz and the other CPs by plotting the  $pK_i$  data  
 1100 against each other. The results (see SI) indicated an extrathermodynamic  
 1101 relationship between Cz and LmCPB, while this was not observed for all the other  
 1102 CPs. This finding highlight that the mode of inhibition for this series of compounds is  
 1103 similar for Cz and LmCPB, corroborating the fact that all the structural  
 1104 transformations of prototype compounds **9** and **11** affected the affinity towards the  
 1105 two protozoa CPs with the same magnitude (Fig 8, Fig 9).

1106 One common approach to SAR analysis is to examine  $\Delta pK_i$  values associated with  
1107 particular structural transformations, and these can be specified concisely using the  
1108 square bracket notation previously described [30]. For example, the structural  
1109 transformation of the phenylalanine in P2 of compound **6** to the corresponding 3-  
1110 chloro-phenylalanine (**8**) can be noted as [**6**→**8**]. As already described for Cz [13],  
1111 the exchange of benzoyl by 1-methyl-3-*tert*-butyl-pyrazolyl-carbonyl [**6**→**9**] led to a  
1112 potency increase of 0.5 log units. Following this path, we inserted a meta-benzoic  
1113 ester in the P3 position in the attempt to design a prodrug analogue [14]. The  
1114 transformation [**6**→**16**] unfortunately displayed a slight increment as compared to the  
1115 transformation [**6**→**14**]. Hence, compound **9** ( $pK_i$  of 7.4 for Cz) has been used as a  
1116 prototype for mapping S1-P1 interaction on different targets (Fig 8).

1117

#### 1118 **Fig 8. SAR summary for S1-P1 interactions.**

1119 Values are reported as differences in  $pK_i$  and are color-coded as red (negative),  
1120 green (positive), grey (no significant difference,  $\Delta pK_i < 0.2$ ).

1121

1122 The effects on affinity resulting from stereochemical modifications in P1 of the  
1123 structural prototype **9** are shown in Fig 8. In general, the stereochemistry of P1  
1124 moiety strongly influences the affinity towards all the CPs. The (*S*)→(*R*) conversion  
1125 in [**50**→**51**] and [**52**→**53**] decrease the  $pK_i$  values for Cz and LmCP both by about  
1126 one log unit. Likewise, the double stereochemical modification from (*R,R*) benzyl-  
1127 protected threonine to the (*S,S*) diastereomer [**56**→**57**] led to a complete all-target  
1128 affinity loss. Instead, the structural transformation from the cyclopropyl unit to CH  
1129 attached with a benzyl group [**9**→**50**] resulted in a significant affinity increment for Cz

1130 and LmCPB of 0.4 and 0.7 log units, respectively. Replacement of the P1  
1131 cyclopropane linker with CH attached to isopropyl [9→52], 3-chlorobenzyl [9→54], or  
1132 even 4-pyridyl [9→55] led to a small increase or no significant difference in affinity  
1133 against those two protozoa enzymes. Moreover, the insertion of the benzyl protected  
1134 threonine in P1 [9→56] and [9→57] decreased the affinity for Cz and LmCPB.  
1135 Remarkably, replacement by the hydroxybutyl residues led to an almost one  
1136 hundredfold affinity loss for both enzymes. Essentially, the same trend in affinity was  
1137 observed for the four mammalian CPs, when the structural modifications in P1 were  
1138 realized starting from the prototype compound **9** as illustrated in Fig 6. Singularly, the  
1139 introduction of a benzyl-protected threonine [9→50] resulted in an  $pK_i$  decrease of  
1140 0.4 log units towards CatB.

1141 As recently described [13], the effects on affinity when replacing the P2  
1142 phenylalanine (**9**) with leucine (**11**) appears to depend on the substructural context,  
1143 and this relates to non-additivity in the SAR. Accordingly, we used compound **11** as  
1144 a starting prototype for another SAR considering P1, P2, and P3 for structural  
1145 modifications as summarized in Fig 9.

1146 **Fig 9. SAR summary starting from compound 11.**

1147 Values are reported as differences in  $pK_i$  and are color-coded as red (negative),  
1148 green (positive), grey (no significant difference,  $\Delta pK_i < 0.2$ ).

1149  
1150 Substitution of the in P3 positioned 1-methyl-3-*tert*-butyl-pyrazole ring with 7-chloro-  
1151 quinoline (**15**), or 1*H*-indole (**18**) preserved the high affinity towards Cz and LmCPB,  
1152 and, strikingly, this substitution led to a decrease of 1.0 and 0.5 in the  $pK_i$  value for  
1153 CatL (Fig 9). Noteworthy, when the 7-chloro-quinoline moiety was retained in P3 and



1154 leucine was exchanged for tryptophan in P2 [**14**→**15**], a huge loss in affinity and  
1155 selectivity was observed. Insertion of a basic moiety, *i.e.*, 2-amino pyridine [**11**→**17**],  
1156 produced a significant reduction of potency for Cz (-0.7) and LmCPB (-0.5).  
1157 Compound **18** showed a high affinity for CatK ( $pK_i$  of 8.7) with a significant selectivity  
1158 over the other mammalian CPs (Fig 9). In P2 position, the transformation of the  
1159 leucine moiety to phenylalanine or its derivatives resulted in a loss in affinity up to  
1160 one log unit for Cz. A similar replacement led to a gain in affinity towards CatL and  
1161 CatB, and it is consistent with previously reported data [31]. For compound **11**, as for  
1162 compound **9**, the stereochemistry of the substituent in P1 was vitally for the  
1163 bimolecular recognition process. Moreover, the transformation [**11**→**58**] kept the  $pK_i$   
1164 in the same range for Cz while increasing it by 0.4 log units for LmCPB.

1165 Non-additivity in SAR is of considerable interest [32], and this is illustrated for the six  
1166 cysteine proteases in Fig 10. Non-additivity can be quantified by comparing the  $\Delta pK_i$   
1167 value resulting from a pair of substructural transformations with the sum of  $\Delta pK_i$   
1168 values that result from the individual transformations. The Cz  $\Delta pK_i$  values for [**9**→**11**]  
1169 (0.5) and [**9**→**56**] (-1.0) shown in Fig 10A sum up to -0.5. Nevertheless [**9**→**58**],  
1170 which corresponds the simultaneous application of the pair transformations, is  
1171 associated with a  $\Delta pK_i$  value increase of +0.6, thus indicating that the effects of this  
1172 pair of transformations on Cz affinity are superadditive. The same was true for the  
1173 effects of these two transformations on the other five CPs. Analogous analysis of the  
1174 results in Fig 10B displays the effects of two transformations to be superadditive for  
1175 the entire CP targets investigated herein. These results entail the P1-S1 and P1-S1'  
1176 interactions to be driven by the molecular recognition in P2.

1177

1178 **Fig 10. Non-additivity of SAR.**

1179 Values are reported as differences in  $pK_i$  and are color-coded as red (negative),  
1180 green (positive), grey (no significant difference,  $\Delta pK_i < 0.2$ ).

1181

1182 Pairwise plots for the selectivity towards Cz in relation to other human cathepsins are  
1183 provided in Fig 11. It is not trivial to achieve a significant selectivity for Cz inhibitors  
1184 ( $\Delta pK_i > 1.0$ ) over mammalian CPs due to their high structural similarity of the active  
1185 site. Undeniably, CatB has a different mode of binding due to the larger S2 and S3  
1186 pockets [31]. Compounds **14** and **67** displayed a significant selectivity toward CatL  
1187 and CatS, respectively. The Cz selectivity in the case of compound **14** is driven by  
1188 the S3-P3, while that of **67** second is driven by S1-P1 interaction. Additionally, the  
1189 hydrophobic interaction in S1 and S1' with P1 of compounds **50**, **54** and **60** resulted  
1190 in a good selectivity over CatK. On the other hand, the results indicate how CatL,  
1191 CatS and CatK inhibitors could be repurposed for the inhibition of protozoa CPs.

1192

1193 **Fig 11. Selectivity pairwise plots.**

1194 Values are given in  $pK_i$ . X-axis represents the difference in  $pK_i$  for the same inhibitor  
1195 for a pair of CPs. Y-axis represents the mean value of  $pK_i$  for the same inhibitor for a  
1196 pair of CPs. Black dashed line highlights no selectivity. The magenta dashed line  
1197 highlight a significant selectivity. Positive differences correspond to Cz  $pK_i$  values  
1198 that are greater than those for CatB, CatK, CatL or CatS.

1199

1200 **Biological evaluation**

1201 All compounds synthesized were evaluated for their trypanocidal activity against the  
1202 amastigote form of the Tulahuen *T. cruzi* strain, and the results are presented in

1203 Table 2. Three compounds (**52**, **57** and **60**) were equipotent with benznidazole as  
1204 trypanocidal agents. In particular, compounds **52** and **60** are both low nanomolar Cz  
1205 inhibitors and one-digit nanomolar inhibitors for CatL. Compound **57** had no affinity  
1206 for any of the six CPs reported herein, which excluded the possibility that its  
1207 mechanism of action is similar to compound **52** and **60**. Physicochemical properties  
1208 (clogP, MM, TPSA, LogS) play an important role in drug design. As well, for potential  
1209 trypanocidal agents, which had been designed as protozoan cysteine proteases  
1210 inhibitors, physicochemical properties can influence their outcome. Therefore, we  
1211 have included TPSA, calculated logP (ilogP), and LogS (Ali\_LogS) in this discussion  
1212 (Fig 12, Fig 13, Fig 14) [33].

1213 **Fig 12. Schematic representation of physicochemical properties and SARs for**  
1214 **trypanocidal activity.**

1215 EC<sub>50</sub> calculated for amastigote forms of *T. cruzi* (Tuhaluen strain). CC<sub>50</sub> calculated for  
1216 LLCMK2 strain (host cell). TPSA, ilogP, and Ali\_Logs have been calculated with the  
1217 swissADME on-line service [33].<sup>1</sup> pK<sub>i</sub> values are referring to Cz inhibition.

1218  
1219 In general, the substitution of the P3 or P2 moieties from the prototype compound (**9**)  
1220 did not result in any increment of potency, except in case of compound **12** (Fig 12).  
1221 Substitution of Phe for (S,R)-Thr-O-Bn led to a modest trypanocidal activity.  
1222 Modification in P1 strongly modulated the trypanocidal effect. If considering  
1223 physicochemical properties, we observed a trend for this small compound set,  
1224 insofar the reduction in lipophilicity corresponded to higher trypanocidal potency, as  
1225 can be seen for compound **52** (EC<sub>50</sub> = 4.1 μM; ilogP = 2.3) that presented 17.5 times  
1226 more effective than initial molecule **9** (EC<sub>50</sub> = 71.8 μM).

1227 Single modification in P2 or P3 of compound **9** did not produce a beneficial effect for  
1228 the trypanocidal activity. However, considering both modifications [**9**→**60**], compound  
1229 **60** ( $EC_{50} = 4.93 \mu\text{M}$ ) exhibited 14.5 times more effective than the compound **9** ( $EC_{50}$   
1230  $= 71.8 \mu\text{M}$ ) reaching values similar to Bz (gold standard drug to treated  
1231 Chagas' disease) exhibited a promising trypanocidal activity (Fig 13). In this case, the  
1232  $\text{ilogP}$  was the highest of the entire series and more than one log unit larger than for  
1233 compound **54**. It is noteworthy that compound **57**, exhibiting the same values for  
1234 TPSA and  $\text{ilogP}$  as **60**, had no affinity for CPs. In addition, the modifications in  
1235 compound **57** ( $CC_{50} \approx 124.7 \mu\text{M}$ ) was not toxic to cells and showed to be the highest  
1236 selectivity and lowest cytotoxicity in our assays. This guarantees an SI (selective  
1237 index) ratio of over 20, as well as cysteine inhibitor compounds **60** and **52**, making  
1238 them interesting targets for further *in vivo* testing against the acute form of chagas  
1239 disease [34].

1240

1241 **Fig 3. Schematic representation for non-additivity of SARs for trypanocidal**  
1242 **activity.**

1243  $EC_{50}$  calculated for amastigote forms of *T.cruzi* (Tuhaluen strain).  $CC_{50}$  calculated for  
1244 LLCMK2 strain (host cell). TPSA,  $\text{ilogP}$ , and Ali\_Logs have been calculated with the  
1245 swissADME on-line service.<sup>1</sup>  $pK_i$  values are referring to Cz inhibition.

1246

1247 Compounds bearing a leucine moiety in P2 displayed a peculiar behavior (Fig 14).  
1248 Indeed, debenzoylation of the threonine moiety in P1 led to an increase in potency  
1249 [**58**→**66**] and [**59**→**67**]. The trypanocidal potency for this set of compounds seemed

1250 not to correlate with Cz affinity; but, once again, active compounds had an ilogP  
1251 value of less than 3.0.

1252

1253 **Fig 14. Schematic representation for non-additivity of SARs for compounds 58,**  
1254 **59, 67 and 68.**

1255 EC<sub>50</sub> calculated for amastigote forms of *T. cruzi* (Tulahuen strain). CC<sub>50</sub> calculated for  
1256 LLCMK2 strain (host cell). TPSA, ilogP, and Ali\_Logs have been calculated with the  
1257 swissADME on-line service.<sup>1</sup> pK<sub>i</sub> values are referring to Cz inhibition.

1258

1259 Potential cytotoxicity of inhibitors was assessed with the LLCMK<sub>2</sub> cell-based assay,  
1260 and compounds were evaluated over three days using benznidazole as a control.  
1261 Cytotoxicity at the highest concentration tested that did not lead to precipitation (250  
1262 μM) was low for the majority of test compounds. The most potent inhibitors of the  
1263 amastigote *T. Cruzi* Tulahuen strains (**52**, **57** and **60**) showed the same range of  
1264 cytotoxicity when compared to benznidazole.

1265

1266

1267

1268

1269

1270

1271 **Table 2. Biological data for trypanocidal activity (EC<sub>50</sub>), cytotoxicity (CC<sub>50</sub>), and**  
1272 **selective index (SI) for the series of dipeptidyl nitriles.**

| Compounds | IC <sub>50</sub> (μM) | CC <sub>50</sub> (μM) | SI    |
|-----------|-----------------------|-----------------------|-------|
| <b>Bz</b> | 4.4 ± 0.47            | > 100                 | > 23  |
| <b>51</b> | 8.6 ± 0.53            | 42.3 ± 3.94           | 4.9   |
| <b>52</b> | 4.1 ± 0.47            | 97.9 ± 6.52           | 24    |
| <b>57</b> | 4.3 ± 0.32            | > 100                 | > 23  |
| <b>60</b> | 4.9 ± 0.45            | > 100                 | > 20  |
| <b>9</b>  | 72 ± 5.7              | > 100                 | > 1.4 |
| <b>10</b> | 67.6 ± 8.22           | > 100                 | > 1.5 |
| <b>12</b> | 32.7 ± 3.86           | > 100                 | > 3.1 |
| <b>15</b> | 64.7 ± 4.32           | 73.6 ± 8.74           | 1.14  |
| <b>16</b> | 47.3 ± 3.26           | > 100                 | > 2.1 |
| <b>50</b> | 63.3 ± 5.74           | 83.1 ± 6.85           | 1.31  |
| <b>53</b> | 26 ± 2.6              | > 100                 | > 3.8 |
| <b>54</b> | 15.8 ± 1.43           | 44.7 ± 5.24           | 2.83  |
| <b>65</b> | 70.8 ± 8.79           | > 100                 | > 1.4 |
| <b>66</b> | 30.0 ± 2.71           | > 100                 | > 3.3 |
| <b>67</b> | 24.4 ± 2.36           | > 100                 | > 4.1 |
| <b>68</b> | 16 ± 4.0              | > 100                 | > 6.3 |
| <b>69</b> | 30.6 ± 3.11           | > 100                 | > 3.3 |

1273 Benznidazole was used as a positive control. DMSO was used to dissolve compounds and as a  
1274 negative control. All data were obtained using at least two independent experiments. Compounds with  
1275 EC<sub>50</sub> > 100 μM were considered to be not active, and they are not reported in this Table.

1276

1277

1278

1279

1280

## 1281 **Conclusion**

1282 In this study, we expanded our previous series of dipeptidyl nitrile inhibitors of Cz by  
1283 leveraging the P1-S1/S1' interaction. We studied how this interaction can influence  
1284 affinity and selectivity for different CPs, also obtaining the inhibitory data for the  
1285 whole series. Furthermore, 15 compounds had pEC<sub>50</sub> above 4 against *T. cruzi*  
1286 amastigote form, where three of them are equipotent with benznidazole as  
1287 trypanocidal agents with SI (selective index) ratio of over 20, making them interesting  
1288 targets for further *in vivo* testing against the acute form of chagas disease.

1289 Based on the data obtained here and supported by our previous reports, the classic  
1290 view of the small molecule entering the parasite and acting by inhibiting the critical  
1291 function exerted by the cruzipain may be questioned. Many efforts have been made  
1292 to introduce drugs with improved efficacy in order to cure Chagas disease, but not  
1293 much is known about the mechanism of *T. cruzi* death. Even the mechanism of  
1294 action of benznidazole is still poorly understood. The mere inhibition of intracellular  
1295 cruzipain is likely insufficient to cause cell death, which implies several questions  
1296 regarding the drug discovery approach and the current disease model, in particular  
1297 whether the criteria for selecting cruzain as a target for therapeutic intervention are  
1298 justified. Thus, also this study points to the common problem in the translation of the  
1299 results from biochemical assays to the trypanocidal action. Our work also contributes  
1300 to the understanding of subtle drug-target interactions and to the discovery of  
1301 tailored trypanocidal agents equipotent to benznidazole and with the potential of  
1302 further improvement.

1303

## 1304 **References**

- 1305 1. WHO – Chagas disease (American trypanosomiasis). Available from:  
1306 <https://www.who.int/chagas/en/>
- 1307 2. Prata A. Clinical and epidemiological aspects of Chagas disease. *Lancet Infect.*  
1308 *Dis.* 2001;1: 92–100.
- 1309 3. Coura JR, Viñas PA. Chagas disease: a new worldwide challenge. *Nature*  
1310 2010; 465: S6–7.
- 1311 4. Castro JA, deMecca MM, Bartel LC. Toxic side effects of drugs used to treat  
1312 Chagas' disease (American trypanosomiasis). *Hum. Exp. Toxicol.* 2006;25:  
1313 471–479.
- 1314 5. Urbina JA. Specific chemotherapy of Chagas disease: Relevance, current  
1315 limitations and new approaches. *Acta Trop.* 2010;115: 55–68.
- 1316 6. Gillmor SA, Craik CS, Fletterick RJ. Structural determinants of specificity in the  
1317 cysteine protease cruzain. *Prot. Sci.* 1997; 6: 1603–1611.
- 1318 7. Vieira M, Rohloff P, Luo S, Cunha-E-Silva NL, De Souza W, Docampo R. Role  
1319 for a P-type H<sup>+</sup>-ATPase in the acidification of the endocytic pathway of  
1320 *Trypanosoma cruzi*. *Biochem. J.* 2005; 392: 467–474.
- 1321 8. Engel JC, Doyle PS, Hsieh I; McKerrow JH. Cysteine protease inhibitors cure  
1322 an experimental *Trypanosoma cruzi* onfection. *J. Exp. Med.* 1998;188: 725–734.
- 1323 9. Sajid M, Robertson SA, Brinen LS; McKerrow JH, Cruzain: The path from target  
1324 validation to the clinic. *Adv. Exp. Med. Biol.* 2011; 712: 100–115.
- 1325 10. Urbina JA, Docampo R. Specific chemotherapy of CD: controversies and  
1326 advances. *Trends Parasitol.* 2013; 19: 495–501.
- 1327 11. Drugs for Neglected Diseases, Initiative, 2014. K777 (Chagas). Available from:  
1328 <https://www.dndi.org/diseases-projects/portfolio/completed-projects/k777/>



- 1329 12. Ndao M, Beaulieu C, Black WC, Isabel E, Vasquez-Camargo F, Nath-  
1330 Chowdhury M, et al. Reversible cysteine protease inhibitors show promise for a  
1331 Chagas disease cure. *Antimicrob. Agents Chemother.* 2014; 58: 1167–1178.
- 1332 13. Avelar LA, Camilo CD, de Albuquerque S, Fernandes WB, Gonçalez C, Kenny  
1333 PW, et al. Molecular design, synthesis and trypanocidal activity of dipeptidyl  
1334 nitriles as cruzain inhibitors. *PLoS Negl. Trop. Dis.* 2015; 9: e0003916.
- 1335 14. Cianni L, Sartori G, Rosini F, De Vita D, Pires G, Lopes BR, et al. Leveraging  
1336 the cruzain S3 subsite to increase affinity for reversible covalent inhibitors.  
1337 *Bioorg. Chem.* 2018; 79: 285–292.
- 1338 15. Kramer L, Turk D, Turk B. The future of cysteine cathepsins in disease  
1339 management. *Trends Pharmacol Sci.* 2017; 38: 873–898.
- 1340 16. Molecular Operating Environment (MOE), 2018.0101, Chemical Computing  
1341 Group Inc., Montreal, Quebec, Canada.
- 1342 17. Mertens MD, Schmitz J, Horn M, Furtmann N, Bajorath J, Mareš M, et al. A  
1343 coumarin-labeled vinyl sulfone as tripeptidomimetic activity-based probe for  
1344 cysteine cathepsins. *ChemBioChem.* 2014;15: 955–959.
- 1345 18. Frizler M, Lohr F, LülSDorff, M, Gütschow. Facing the gem-dialkyl effect in  
1346 enzyme inhibitor design: preparation of homocycloleucine-based azadipeptide  
1347 nitriles. *M. Chem. Eur. J.* 2011; 17: 11419–11423.
- 1348 19. Schmitz J, Gilberg E, Löser R, Bajorath J, Bartz U, Gütschow M. Cathepsin B:  
1349 Active site mapping with peptidic substrates and inhibitors. *Bioorg. Med. Chem.*  
1350 2018; 27: 1–15.
- 1351 20. Cianni L, Feldmann C, Gilberg E, Gütschow M, Juliano L, Leitao A, Bajorath J,  
1352 Montanari CA. Can Cysteine Protease Cross-class Inhibitors Achieve

- 1353 Selectivity?. J. Med. Chem. 2019;  
1354 <https://doi.org/10.1021/acs.jmedchem.9b00683>.
- 1355 21. Schmitz J, Beckmann AM, Dudic A, Li T, Sellier R, Bartz U, Gütschow M. 3-  
1356 Cyano-3-aza- $\beta$ -amino acid derivatives as inhibitors of human cysteine  
1357 cathepsins. ACS Med. Chem. 2014; 5:1076-1081.
- 1358 22. McGrath ME, Eakin AE, Engel JC, McKerrow JH, Craik CS, Fletterick RJ. The  
1359 crystal structure of cruzain: a therapeutic target for Chagas' disease. J. Mol.  
1360 Biol. 1995; 247: 251–259.
- 1361 23. Brinen LS, Hansell E, Cheng J, Roush WR, McKerrow JH, Fletterick, RJ. A  
1362 target within the target: probing cruzain's P1' site to define structural  
1363 determinants for the Chagas' disease protease. Structure 2000; 8: 831–840.
- 1364 24. Frizler M, Stirnberg M, Sisay MT, Gutschow M. Development of nitrile-based  
1365 peptidic inhibitors of cysteine cathepsins. Curr. Top. Med. Chem. 2010; 10:  
1366 294–322.
- 1367 25. Beaulieu C, Isabel E, Fortier A, Massé, F, Mellon C, Méthot N, et al.  
1368 Identification of potent and reversible cruzipain inhibitors for the treatment of  
1369 Chagas disease. Bioorg. Med. Chem. Lett. 2010; 20: 7444–7449.
- 1370 26. Asaad N, Bethel PA, Coulson MD, Dawson JE, Ford SJ, Gerhardt S, et al.  
1371 Dipeptidyl nitrile inhibitors of Cathepsin L. Bioorg. Med. Chem. Lett. 2009; 19:  
1372 4280–4283.
- 1373 27. Wright JA, Yu J. Spencer JB. Sequential removal of the benzyl-type protecting  
1374 groups PMB and NAP by oxidative cleavage using CAN and DDQ. Tetrahedron  
1375 Lett. 2001; 42: 4033–4036.
- 1376 28. Montanari MLC, Beezer AE, Montanari CA, Pilo-Veloso D. QSAR based on  
1377 biological microcalorimetry. J. Med. Chem. 2000; 43: 3448–3452.

- 1378 29. Nunez S, Venhorst J, Kruse CG. Target-drug interactions: first Principles and  
1379 their application to drug discovery. *Drug Discov Today*. 2012; 17: 10–22.
- 1380 30. Silva DG, Ribeiro JF, De Vita D, Cianni L, Franco CH, Freitas-Junior LH, et al.  
1381 A comparative study of warheads for design of cysteine protease inhibitors.  
1382 *Bioorg. Med. Chem. Lett*. 2017; 27: 5031–5035.
- 1383 31. Schmitz J, Li T, Bartz U, Gütschow M. Cathepsin B inhibitors: combining  
1384 dipeptide nitriles with an occluding loop recognition element by click chemistry.  
1385 *ACS Med. Chem. Lett*. 2016; 7: 211–216.
- 1386 32. Kramer C, Fuchs JE, Liedl KR. Strong nonadditivity as a key structure–activity  
1387 relationship feature: distinguishing structural changes from assay artifacts. *J.*  
1388 *Chem. Inf. Model*. 2015; 55: 483–494.
- 1389 33. SwissADME: a free web tool to evaluate pharmacokinetics, drug-likeness and  
1390 medicinal chemistry friendliness of small molecules. *Sci. Rep*. 2017. doi =  
1391 [doi.org/10.1038/srep42717](https://doi.org/10.1038/srep42717).
- 1392 34. Chatelain E. Chagas disease drug discovery: toward a new era. *J. Biomol.*  
1393 *Screen*. 2015; 20: 22–35.

1394

## 1395 **Supporting information Captions**

1396 **Table S1. Condition for enzymatic assays.**

1397 **Table S2. Structures representation, number identification, nequimed number,  $pK_i$  values for**  
1398 **CatB, CatK, CatL, CatS, Cz and LmCPB.**

1399 **Table S3. Number identification, nequimed number, niological data for trypanocidal activity**  
1400 **( $EC_{50}$ ) and citotoxicity ( $CC_{50}$ ).**

1401 **Figure S1.  $^1H$  NMR (500 MHz,  $DMSO-d_6$ ) of compound 7.**

1402 **Figure S2.  $^{13}C$  NMR (125 MHz,  $DMSO-d_6$ ) of compound 7.**

1403 **Figure S3. LC-MS report for compound 7.**

1404 **Figure S4.  $^1H$  NMR (500 MHz,  $DMSO-d_6$ ) of compound 8.**

1405 **Figure S5.  $^{13}C$  NMR (125 MHz,  $DMSO-d_6$ ) of compound 8.**

- 1406 **Figure S6. LC-MS report for compound 8.**
- 1407 **Figure S7.  $^1\text{H}$  NMR (200 MHz,  $\text{CD}_3\text{OD}$ ) of compound 10.**
- 1408 **Figure S8.  $^{13}\text{C}$  NMR (50 MHz,  $\text{CD}_3\text{OD}$ ) of compound 10.**
- 1409 **Figure S9. HPLC report of compound 10.**
- 1410 **Figure S10.  $^1\text{H}$  NMR (200 MHz,  $\text{CDCl}_3$ ) of compound 12.**
- 1411 **Figure S11.  $^{13}\text{C}$  NMR (50 MHz,  $\text{CDCl}_3$ ) of compound 12.**
- 1412 **Figure S12. HPLC report of compound 12.**
- 1413 **Figure S13.  $^1\text{H}$  NMR (500 MHz,  $\text{DMSO-}d_6$ ) of compound 13.**
- 1414 **Figure S14.  $^{13}\text{C}$  NMR (125 MHz,  $\text{DMSO-}d_6$ ) of compound 13.**
- 1415 **Figure S15. HPLC report for compound 13.**
- 1416 **Figure S16.  $^1\text{H}$  NMR (400 MHz,  $\text{DMSO-}d_6$ ) of compound 14.**
- 1417 **Figure S17.  $^{13}\text{C}$  NMR (100 MHz,  $\text{DMSO-}d_6$ ) of compound 14.**
- 1418 **Figure S18. HPLC report ofr compound 14.**
- 1419 **Figure S19.  $^1\text{H}$  NMR (500MHz,  $\text{DMSO-}d_6$ ) for compound 15.**
- 1420 **Figure S20.  $^{13}\text{C}$  NMR (125 MHz,  $\text{DMSO-}d_6$ ) for compound 15.**
- 1421 **Figure S21. HPLC report for compound 15.**
- 1422 **Figure S22.  $^1\text{H}$  NMR (500MHz,  $\text{DMSO-}d_6$ ) for compound 16.**
- 1423 **Figure S23.  $^{13}\text{C}$  NMR (125 MHz,  $\text{DMSO-}d_6$ ) for compound 16.**
- 1424 **Figure S24. HPLC report for compound 16.**
- 1425 **Figure S25.  $^1\text{H}$  NMR (200MHz,  $\text{CD}_3\text{OD}$ ) for compound 17.**
- 1426 **Figure S26.  $^{13}\text{C}$  NMR (50 MHz,  $\text{CD}_3\text{OD}$ ) for compound 17.**
- 1427 **Figure S27. HPLC report for compound 17.**
- 1428 **Figure S28.  $^1\text{H}$  NMR (200MHz,  $\text{CD}_3\text{OD}$ ) of compound 18.**
- 1429 **Figure S29.  $^{13}\text{C}$  NMR (50 MHz,  $\text{CD}_3\text{OD}$ ) of compound 18.**
- 1430 **Figure S30. HPLC report for compound 18.**
- 1431 **Figure S31.  $^1\text{H}$  NMR (200 MHz,  $\text{CD}_3\text{OD}$ ) of compound 19.**
- 1432 **Figure S 32.  $^{13}\text{C}$  NMR (50 MHz,  $\text{CD}_3\text{OD}$ ) of compound 19.**
- 1433 **Figure S33. HPLC report for compound 19.**
- 1434 **Figure S34.  $^1\text{H}$  NMR (400 MHz,  $\text{CDCl}_3$ ) of compound 50.**
- 1435 **Figure S35.  $^{13}\text{C}$  NMR (100 MHz,  $\text{CDCl}_3$ ) of compound 50.**
- 1436 **Figure S36. HPLC report of compound 50.**
- 1437 **Figure S37.  $^1\text{H}$  NMR (200 MHz,  $\text{CDCl}_3$ ) of compound 51.**
- 1438 **Figure S38.  $^{13}\text{C}$  NMR (50 MHz,  $\text{CDCl}_3$ ) for compound 51.**
- 1439 **Figure S39. HPLC report of compound 51.**
- 1440 **Figure S40.  $^1\text{H}$  NMR (200 MHz,  $\text{CD}_3\text{OD}$ ) of compound 52.**
- 1441 **Figure S41.  $^{13}\text{C}$  NMR (50 MHz,  $\text{CD}_3\text{OD}$ ) of compound 52.**
- 1442 **Figure S42. HPLC report of compound 52.**
- 1443 **Figure S43.  $^1\text{H}$  NMR (200 MHz,  $\text{CDCl}_3$ ) of compound 53.**

- 1444 **Figure S44.**  $^{13}\text{C}$  NMR (50 MHz,  $\text{CDCl}_3$ ) of compound 53.
- 1445 **Figure S45.** HPLC report of compound 53.
- 1446 **Figure S46.**  $^1\text{H}$  NMR (200 MHz,  $\text{CD}_3\text{OD}$ ) of compound 54.
- 1447 **Figure S47.**  $^{13}\text{C}$  NMR (50 MHz,  $\text{CD}_3\text{OD}$ ) of compound 54.
- 1448 **Figure S48.** HPLC report of compound 54.
- 1449 **Figure S49.**  $^1\text{H}$  NMR (400 MHz,  $\text{CD}_3\text{OD}$ ) of compound 55.
- 1450 **Figure S50.**  $^{13}\text{C}$  NMR (100 MHz,  $\text{CD}_3\text{OD}$ ) of compound 55.
- 1451 **Figure S51.** HPLC report of compound 55.
- 1452 **Figure S52.**  $^1\text{H}$  NMR (200 MHz,  $\text{CDCl}_3$ ) for compound 56.
- 1453 **Figure S53.**  $^{13}\text{C}$  NMR (50 MHz,  $\text{CDCl}_3$ ) for compound 56.
- 1454 **Figure S54.** HPLC report of compound 56.
- 1455 **Figure S55.**  $^1\text{H}$  NMR (200 MHz,  $\text{CDCl}_3$ ) of compound 57.
- 1456 **Figure S56.**  $^{13}\text{C}$  NMR (50 MHz,  $\text{CDCl}_3$ ) of compound 57.
- 1457 **Figure S57.** HPLC report of compound 57.
- 1458 **Figure S58.**  $^1\text{H}$  NMR (400 MHz,  $\text{DMSO-}d_6$ ) of compound 58.
- 1459 **Figure S59.**  $^{13}\text{C}$  NMR (100 MHz,  $\text{DMSO-}d_6$ ) of compound 58.
- 1460 **Figure S60.** HPLC report of compound 58.
- 1461 **Figure S61.**  $^1\text{H}$  NMR (400 MHz,  $\text{CDCl}_3$ ) of compound 59.
- 1462 **Figure S62.**  $^{13}\text{C}$  NMR (100 MHz,  $\text{CDCl}_3$ ) of compound 59.
- 1463 **Figure S63.** HPLC report of compound 59.
- 1464 **Figure S64.**  $^1\text{H}$  NMR (400 MHz,  $\text{CDCl}_3$ ) of compound 60.
- 1465 **Figure S65.**  $^{13}\text{C}$  NMR (100 MHz,  $\text{CDCl}_3$ ) of compound 60.
- 1466 **Figure S66.** HPLC report of compound 60.
- 1467 **Figure S67.**  $^1\text{H}$  NMR (400 MHz,  $\text{CDCl}_3$ ) of compound 65.
- 1468 **Figure S68.**  $^{13}\text{C}$  NMR (100 MHz,  $\text{CDCl}_3$ ) of compound 65.
- 1469 **Figure S69.** HPLC report of compound 65.
- 1470 **Figure S70.**  $^1\text{H}$  NMR (400 MHz,  $\text{CDCl}_3$ ) of compound 66.
- 1471 **Figure S71.**  $^{13}\text{C}$  NMR (100 MHz,  $\text{CDCl}_3$ ) of compound 66.
- 1472 **Figure S72.** HPLC report of compound 66.
- 1473 **Figure S73.**  $^1\text{H}$  NMR (400 MHz,  $\text{CDCl}_3$ ) of compound 67.
- 1474 **Figure S74.**  $^{13}\text{C}$  NMR (100 MHz,  $\text{CDCl}_3$ ) of compound 67.
- 1475 **Figure S75.** HPLC report of compound 67.
- 1476 **Figure S76.**  $^1\text{H}$  NMR (400 MHz,  $\text{CD}_3\text{OD}$ ) of compound 68.
- 1477 **Figure S77.**  $^{13}\text{C}$  NMR (100 MHz,  $\text{CD}_3\text{OD}$ ) of compound 68.
- 1478 **Figure S78.** HPLC report of compound 68.
- 1479 **Figure S79.**  $^1\text{H}$  NMR (400 MHz,  $\text{CD}_3\text{OD}$ ) of compound 69.
- 1480 **Figure S80.**  $^{13}\text{C}$  NMR (100 MHz,  $\text{CD}_3\text{OD}$ ) of compound 69.
- 1481 **Figure S81.** HPLC report of compound 69.

- 1482 **Figure S82. HPLC report with Diacel column of compound 50.**
- 1483 **Figure S83. HPLC report Diacel column of compound 51.**
- 1484 **Figure S84. HPLC report with Diacel column of a mixture of compounds 50 and 51.**
- 1485 **Figure S85. HPLC report with Diacel column for compound 56.**
- 1486 **Figure S86. HPLC report with Diacel column for compound 57.**
- 1487 **Figure S87. HPLC report with Diacel column of a mixture of compound 56 and 57.**
- 1488 **Figure S88. HPLC report with Diacel column for compound 65.**
- 1489 **Figure S89. HPLC report with Diacel column for compound 66.**
- 1490 **Figure S 90. HPLC report with Diacel column of a mixture of compound 65 and 66.**
- 1491 **Figure S91. Non linear kinetic plot for Neq0922 (58).**
- 1492 **Figure S92. Regural residual plot for Neq0922 (58).**
- 1493 **Figure S93. Plot of  $pK_i$  (Cz) vs.  $pK_i$  (LmCPB). A linear trendline fitted points.**
- 1494 **Figure S94. Dose curve response for determination of  $CC_{50}$  (LLCMK2) and  $EC_{50}$  (*T. cruzi***  
1495 ***Tulahuen*).**
-

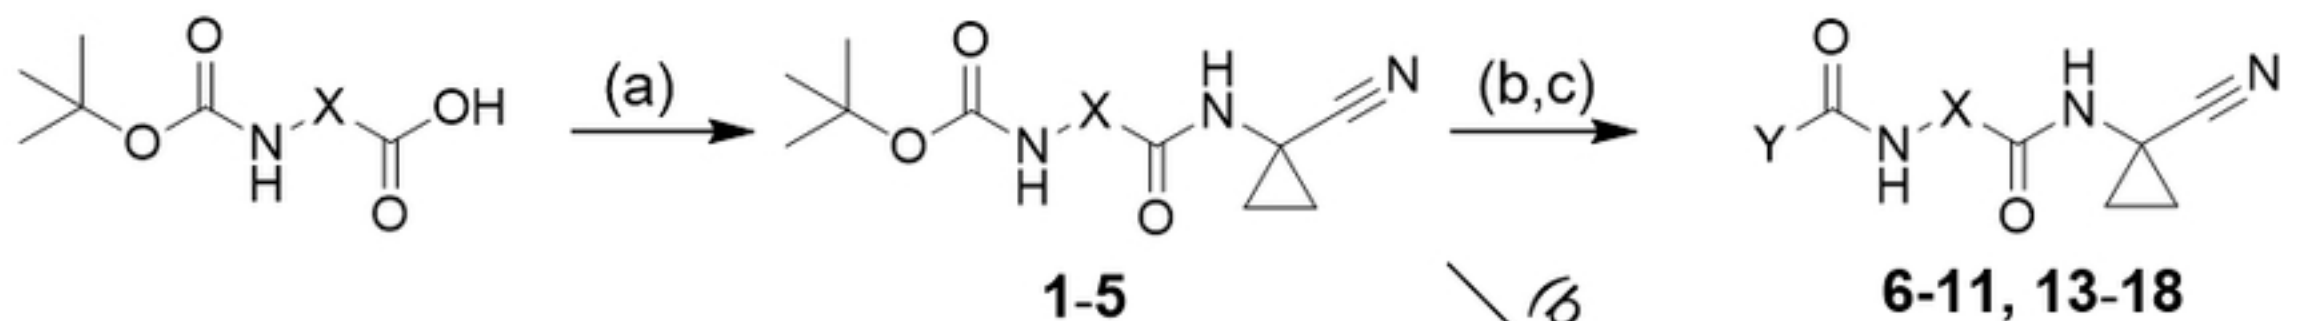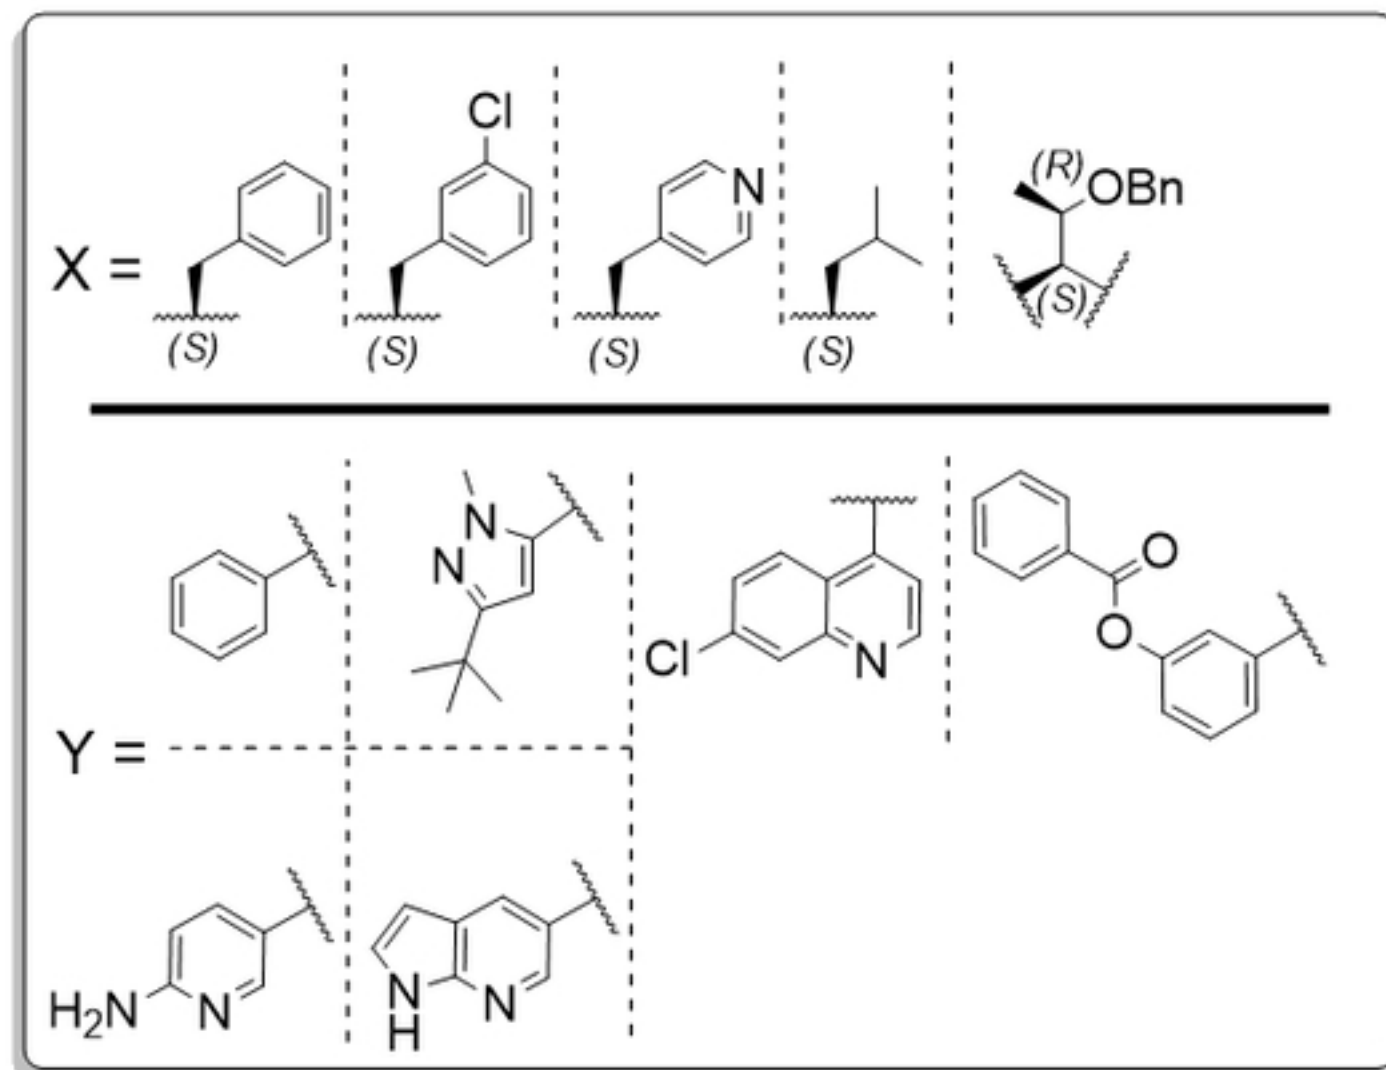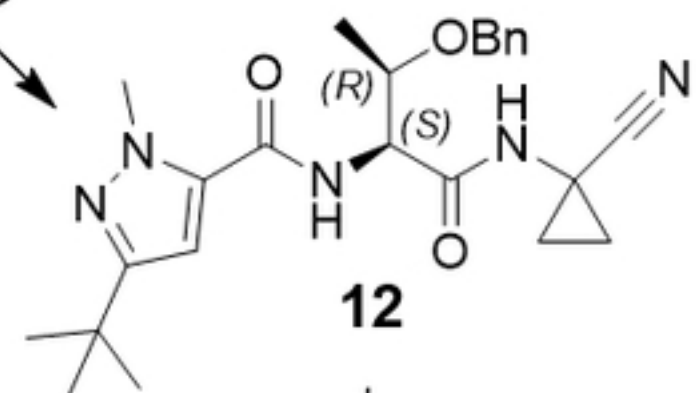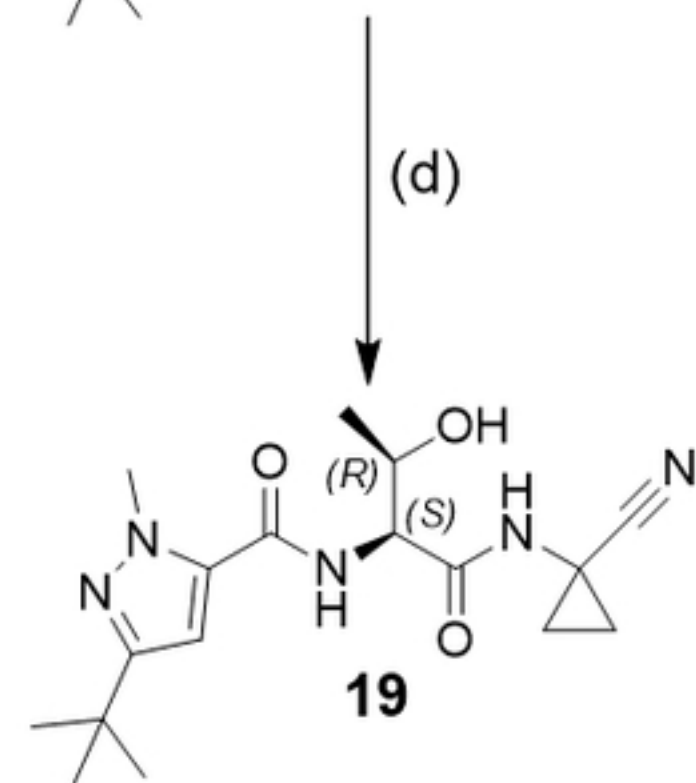

Figure 1

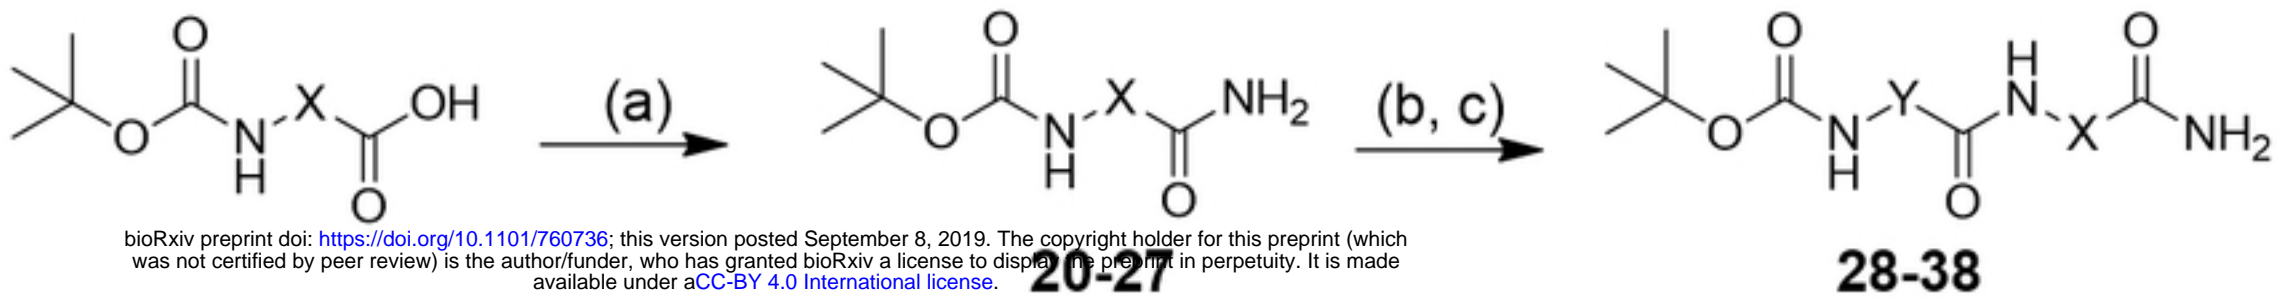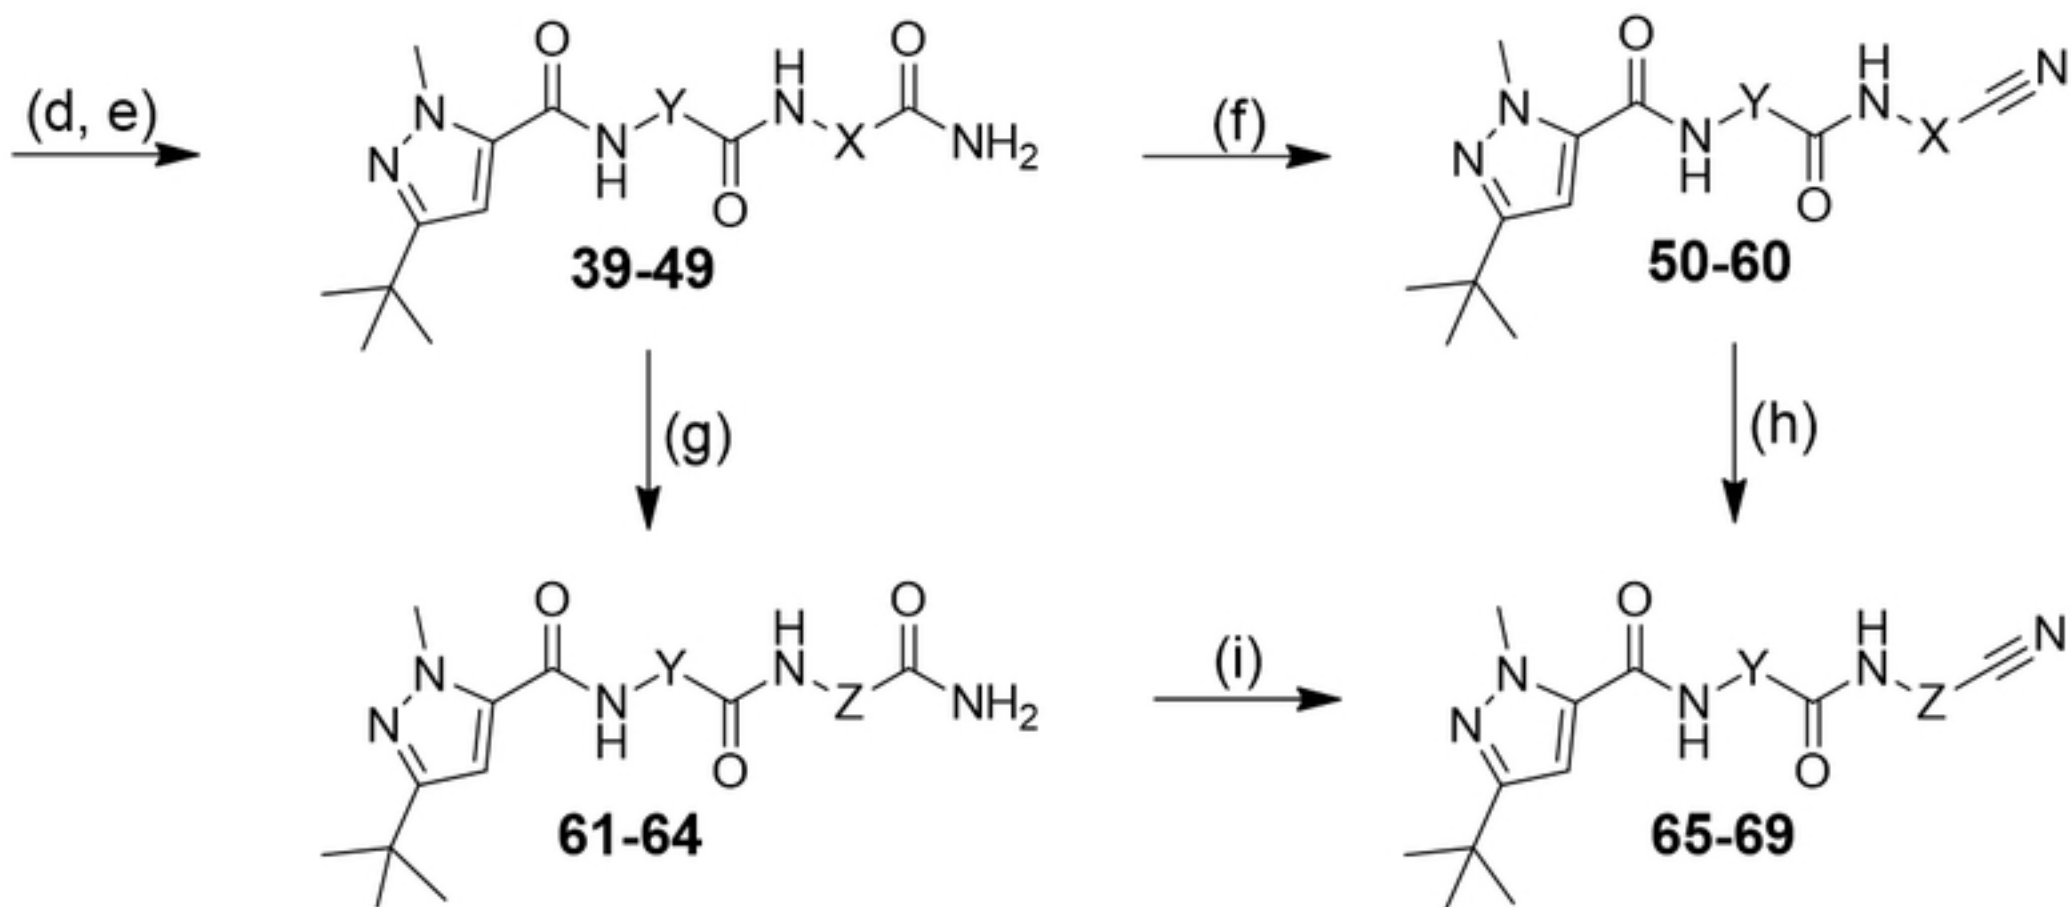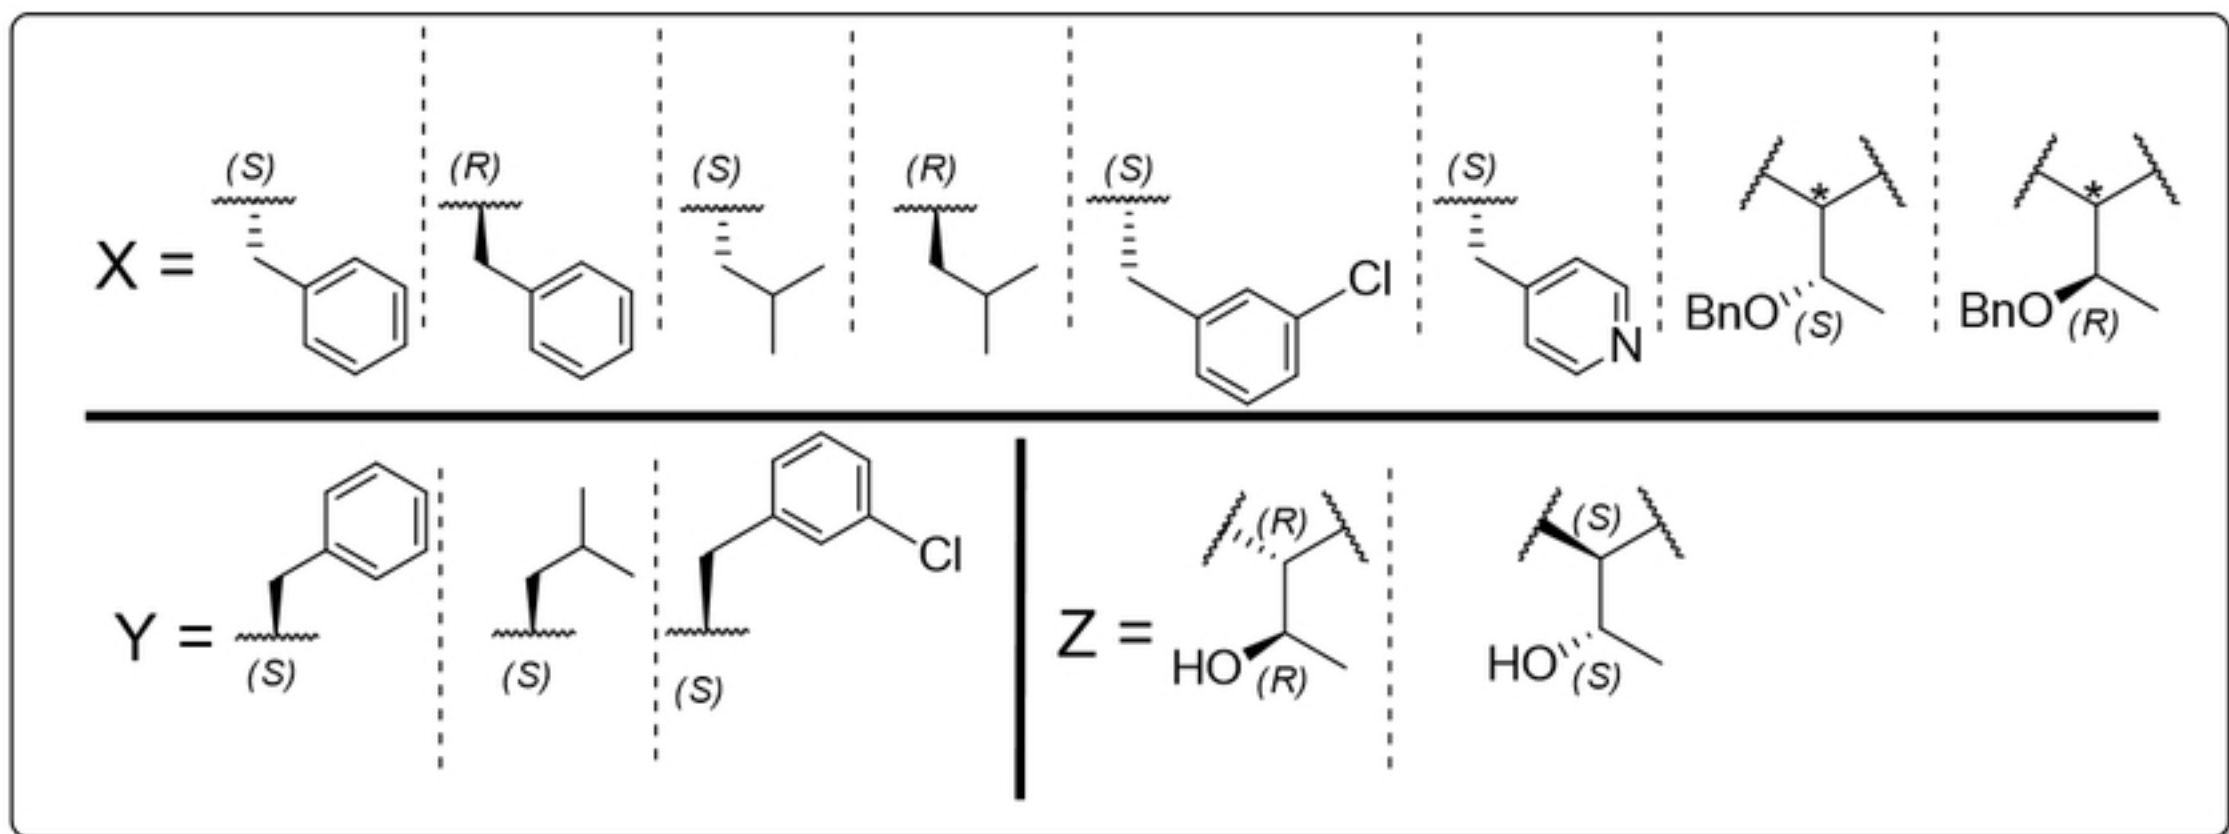

Figure 2



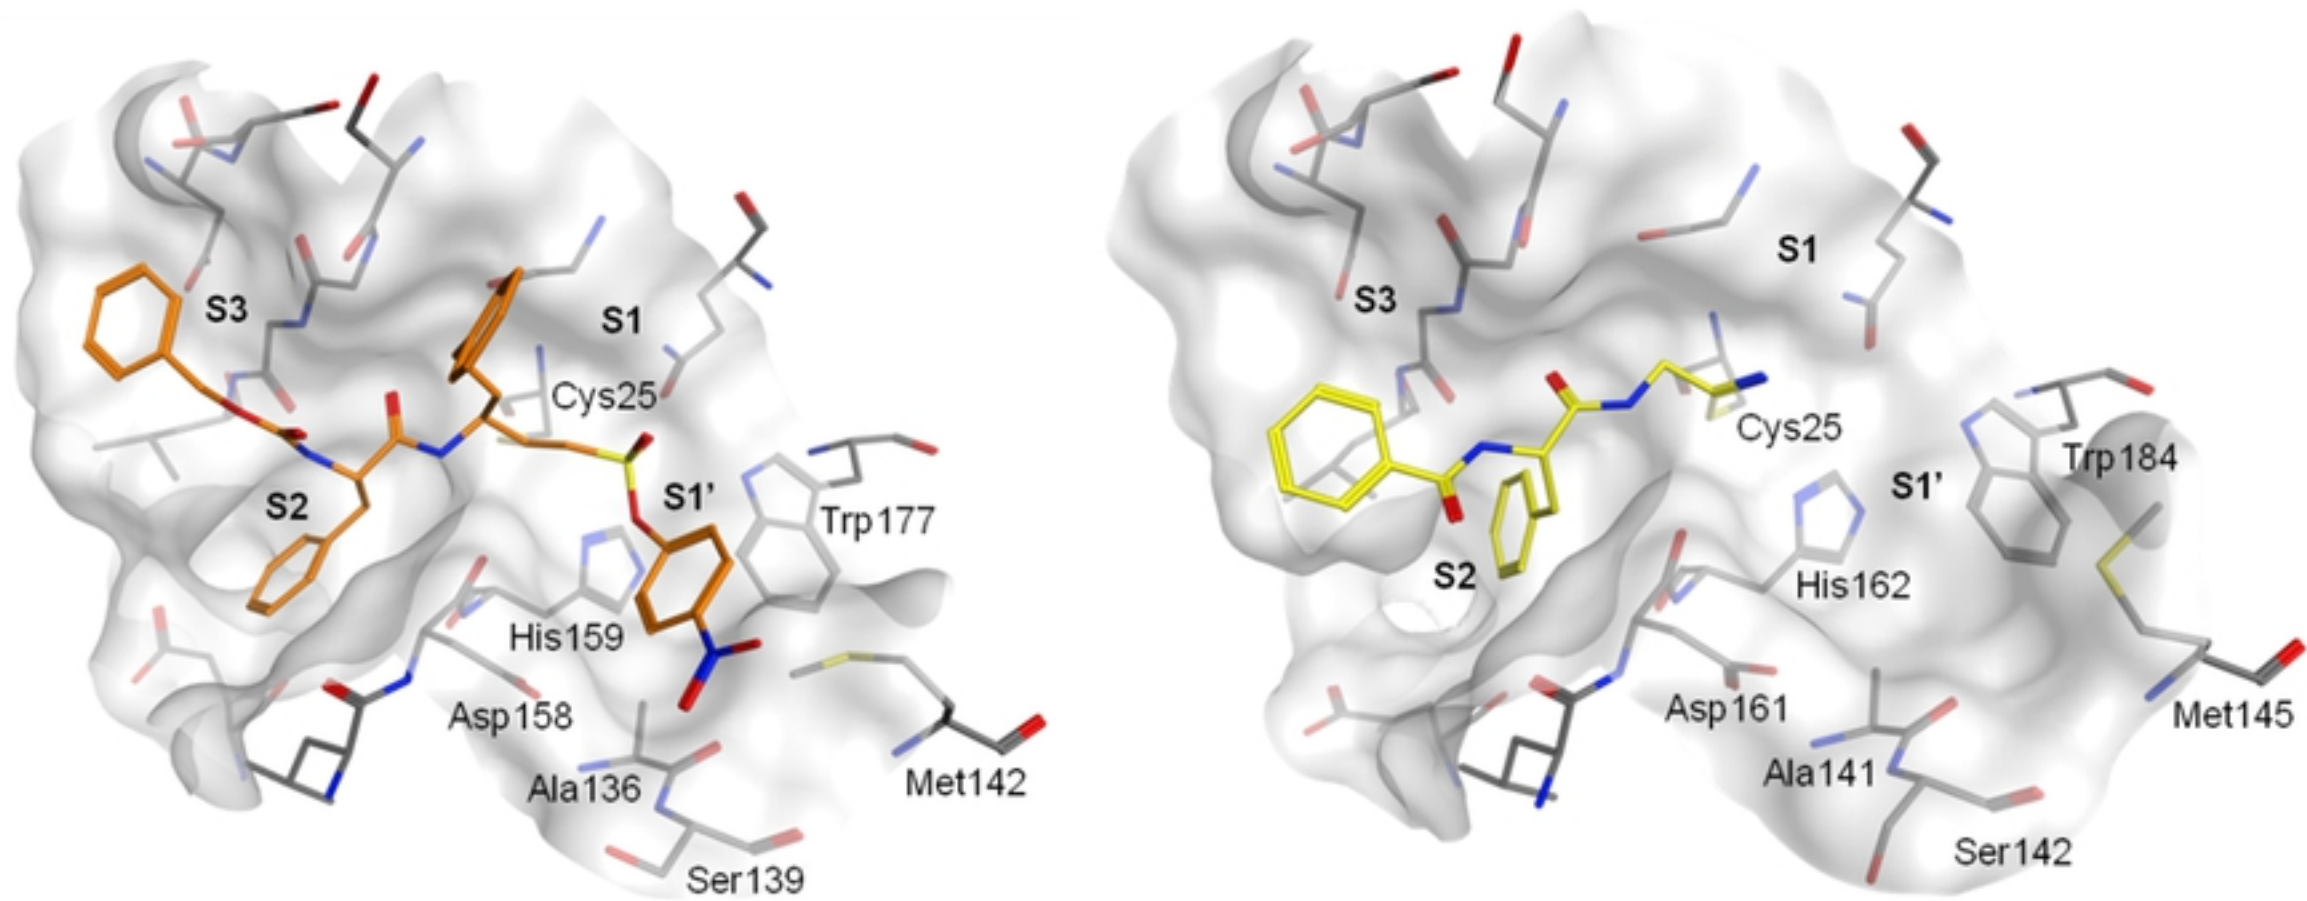

Figure 3

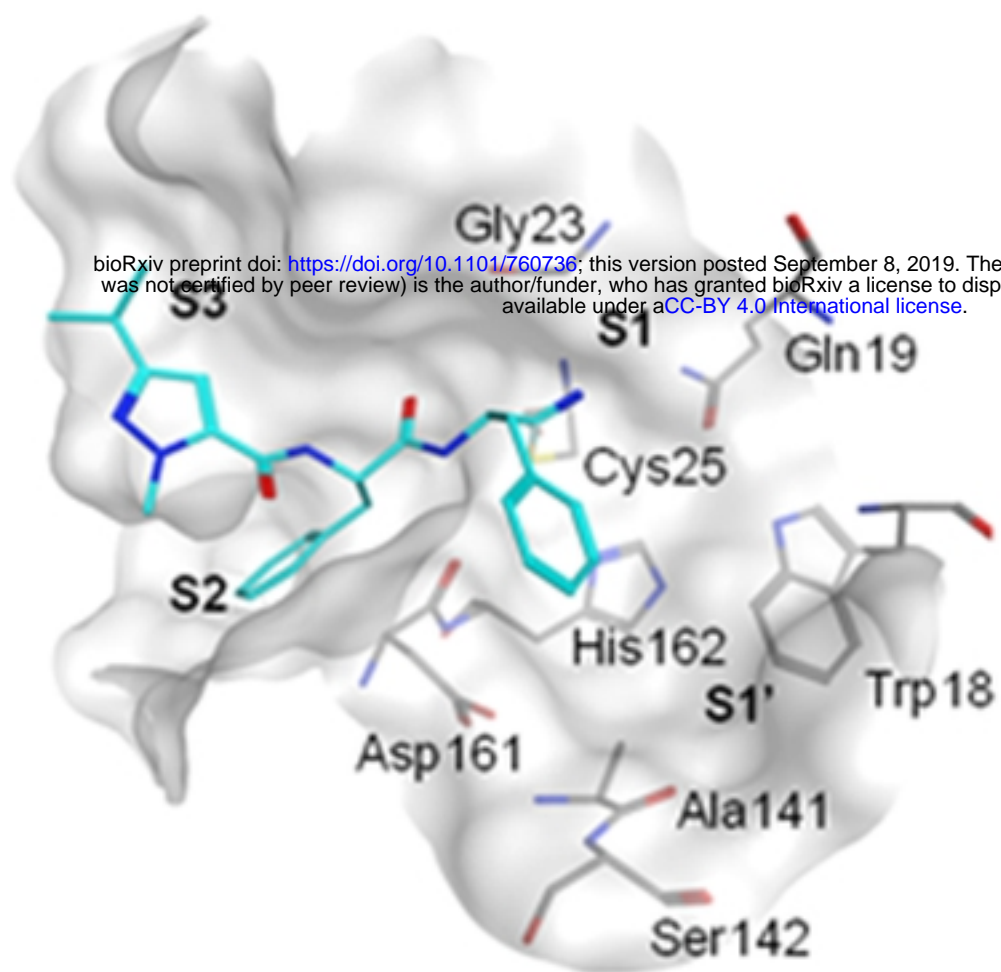

**Compound 50**

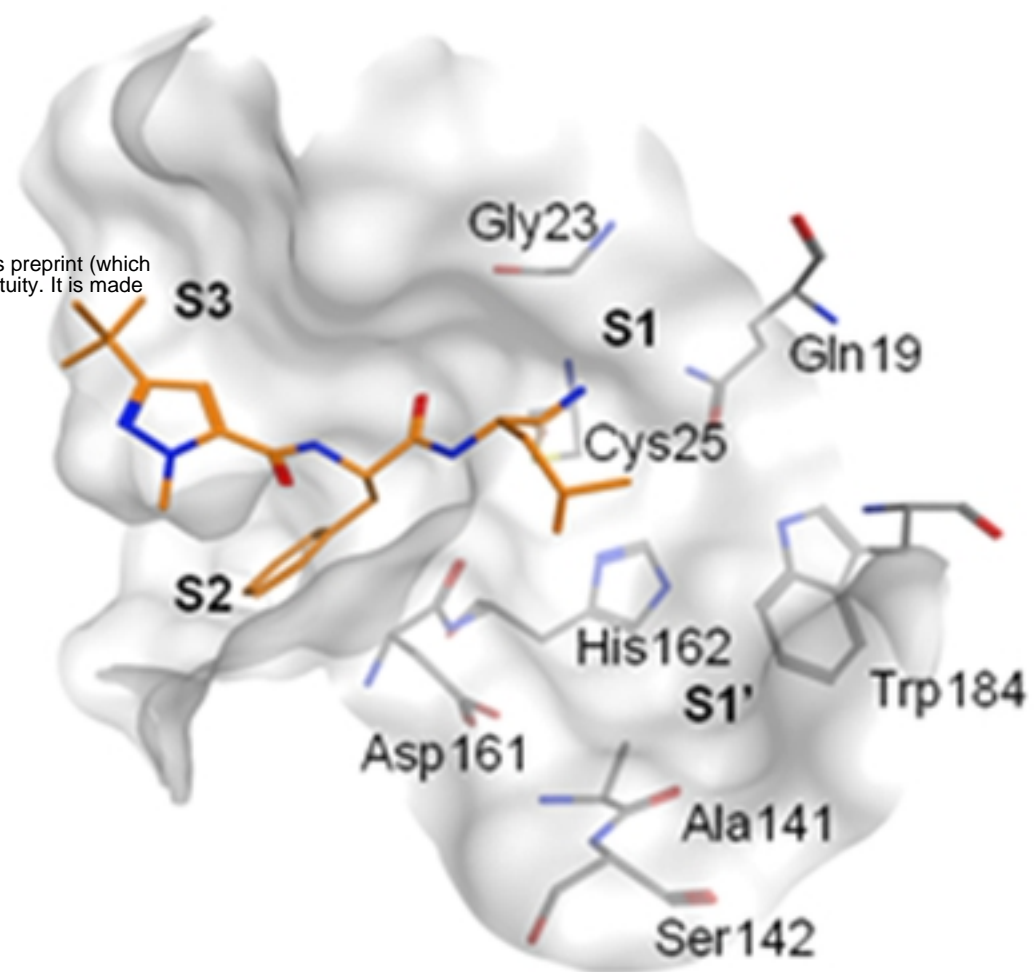

**Compound 52**

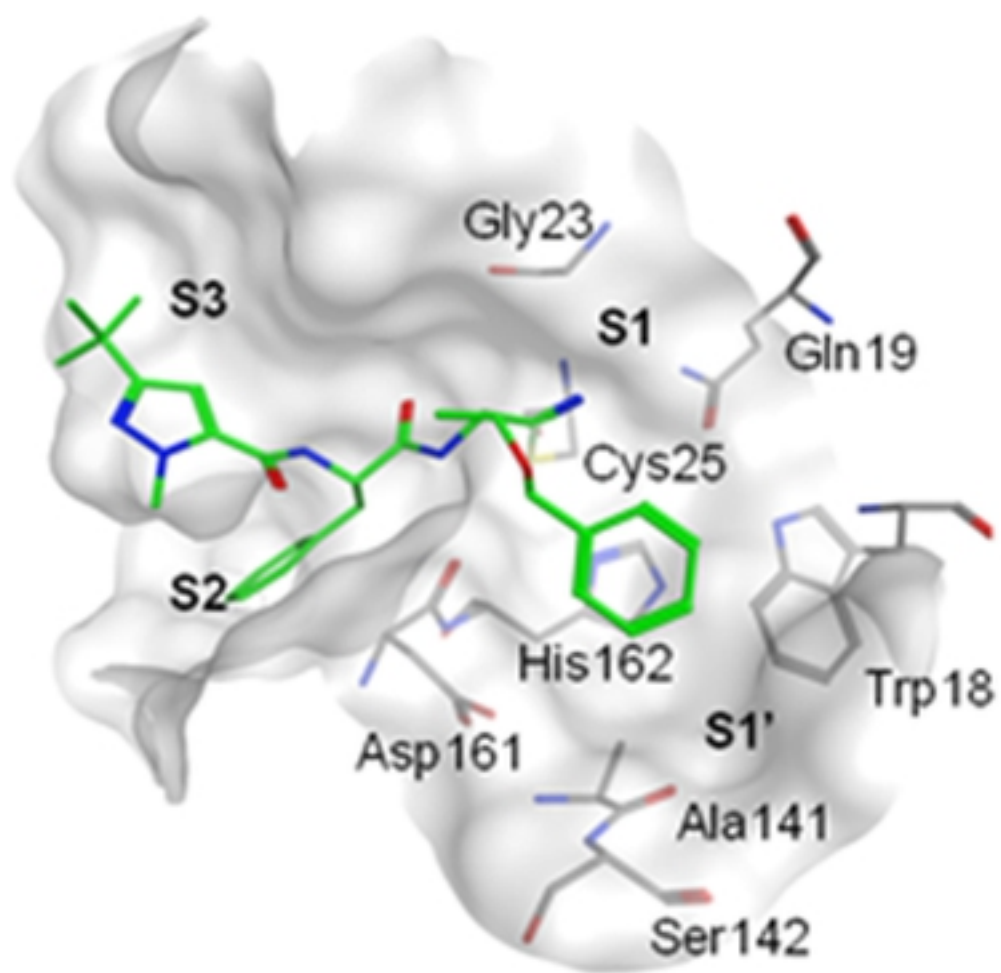

**Compound 56**

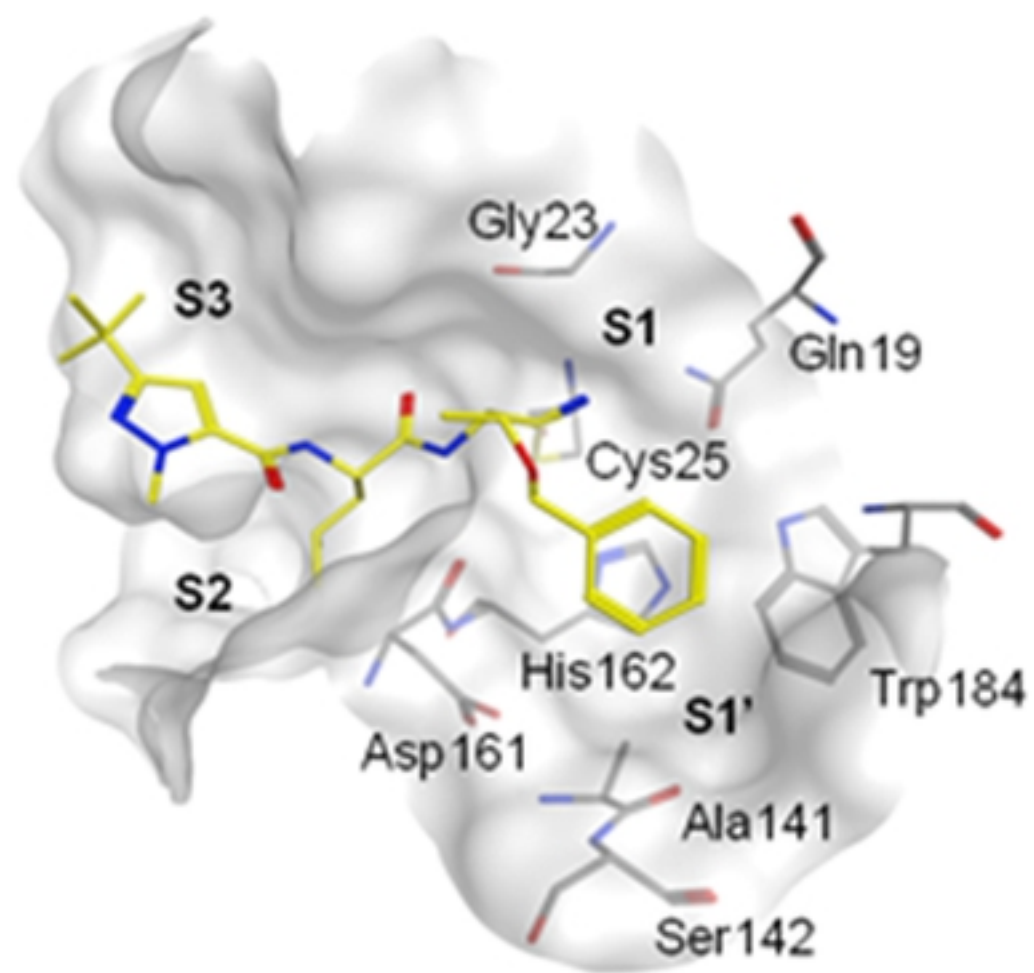

**Compound 58**

bioRxiv preprint doi: <https://doi.org/10.1101/760736>; this version posted September 8, 2019. The copyright holder for this preprint (which was not certified by peer review) is the author/funder, who has granted bioRxiv a license to display the preprint in perpetuity. It is made available under aCC-BY 4.0 International license.

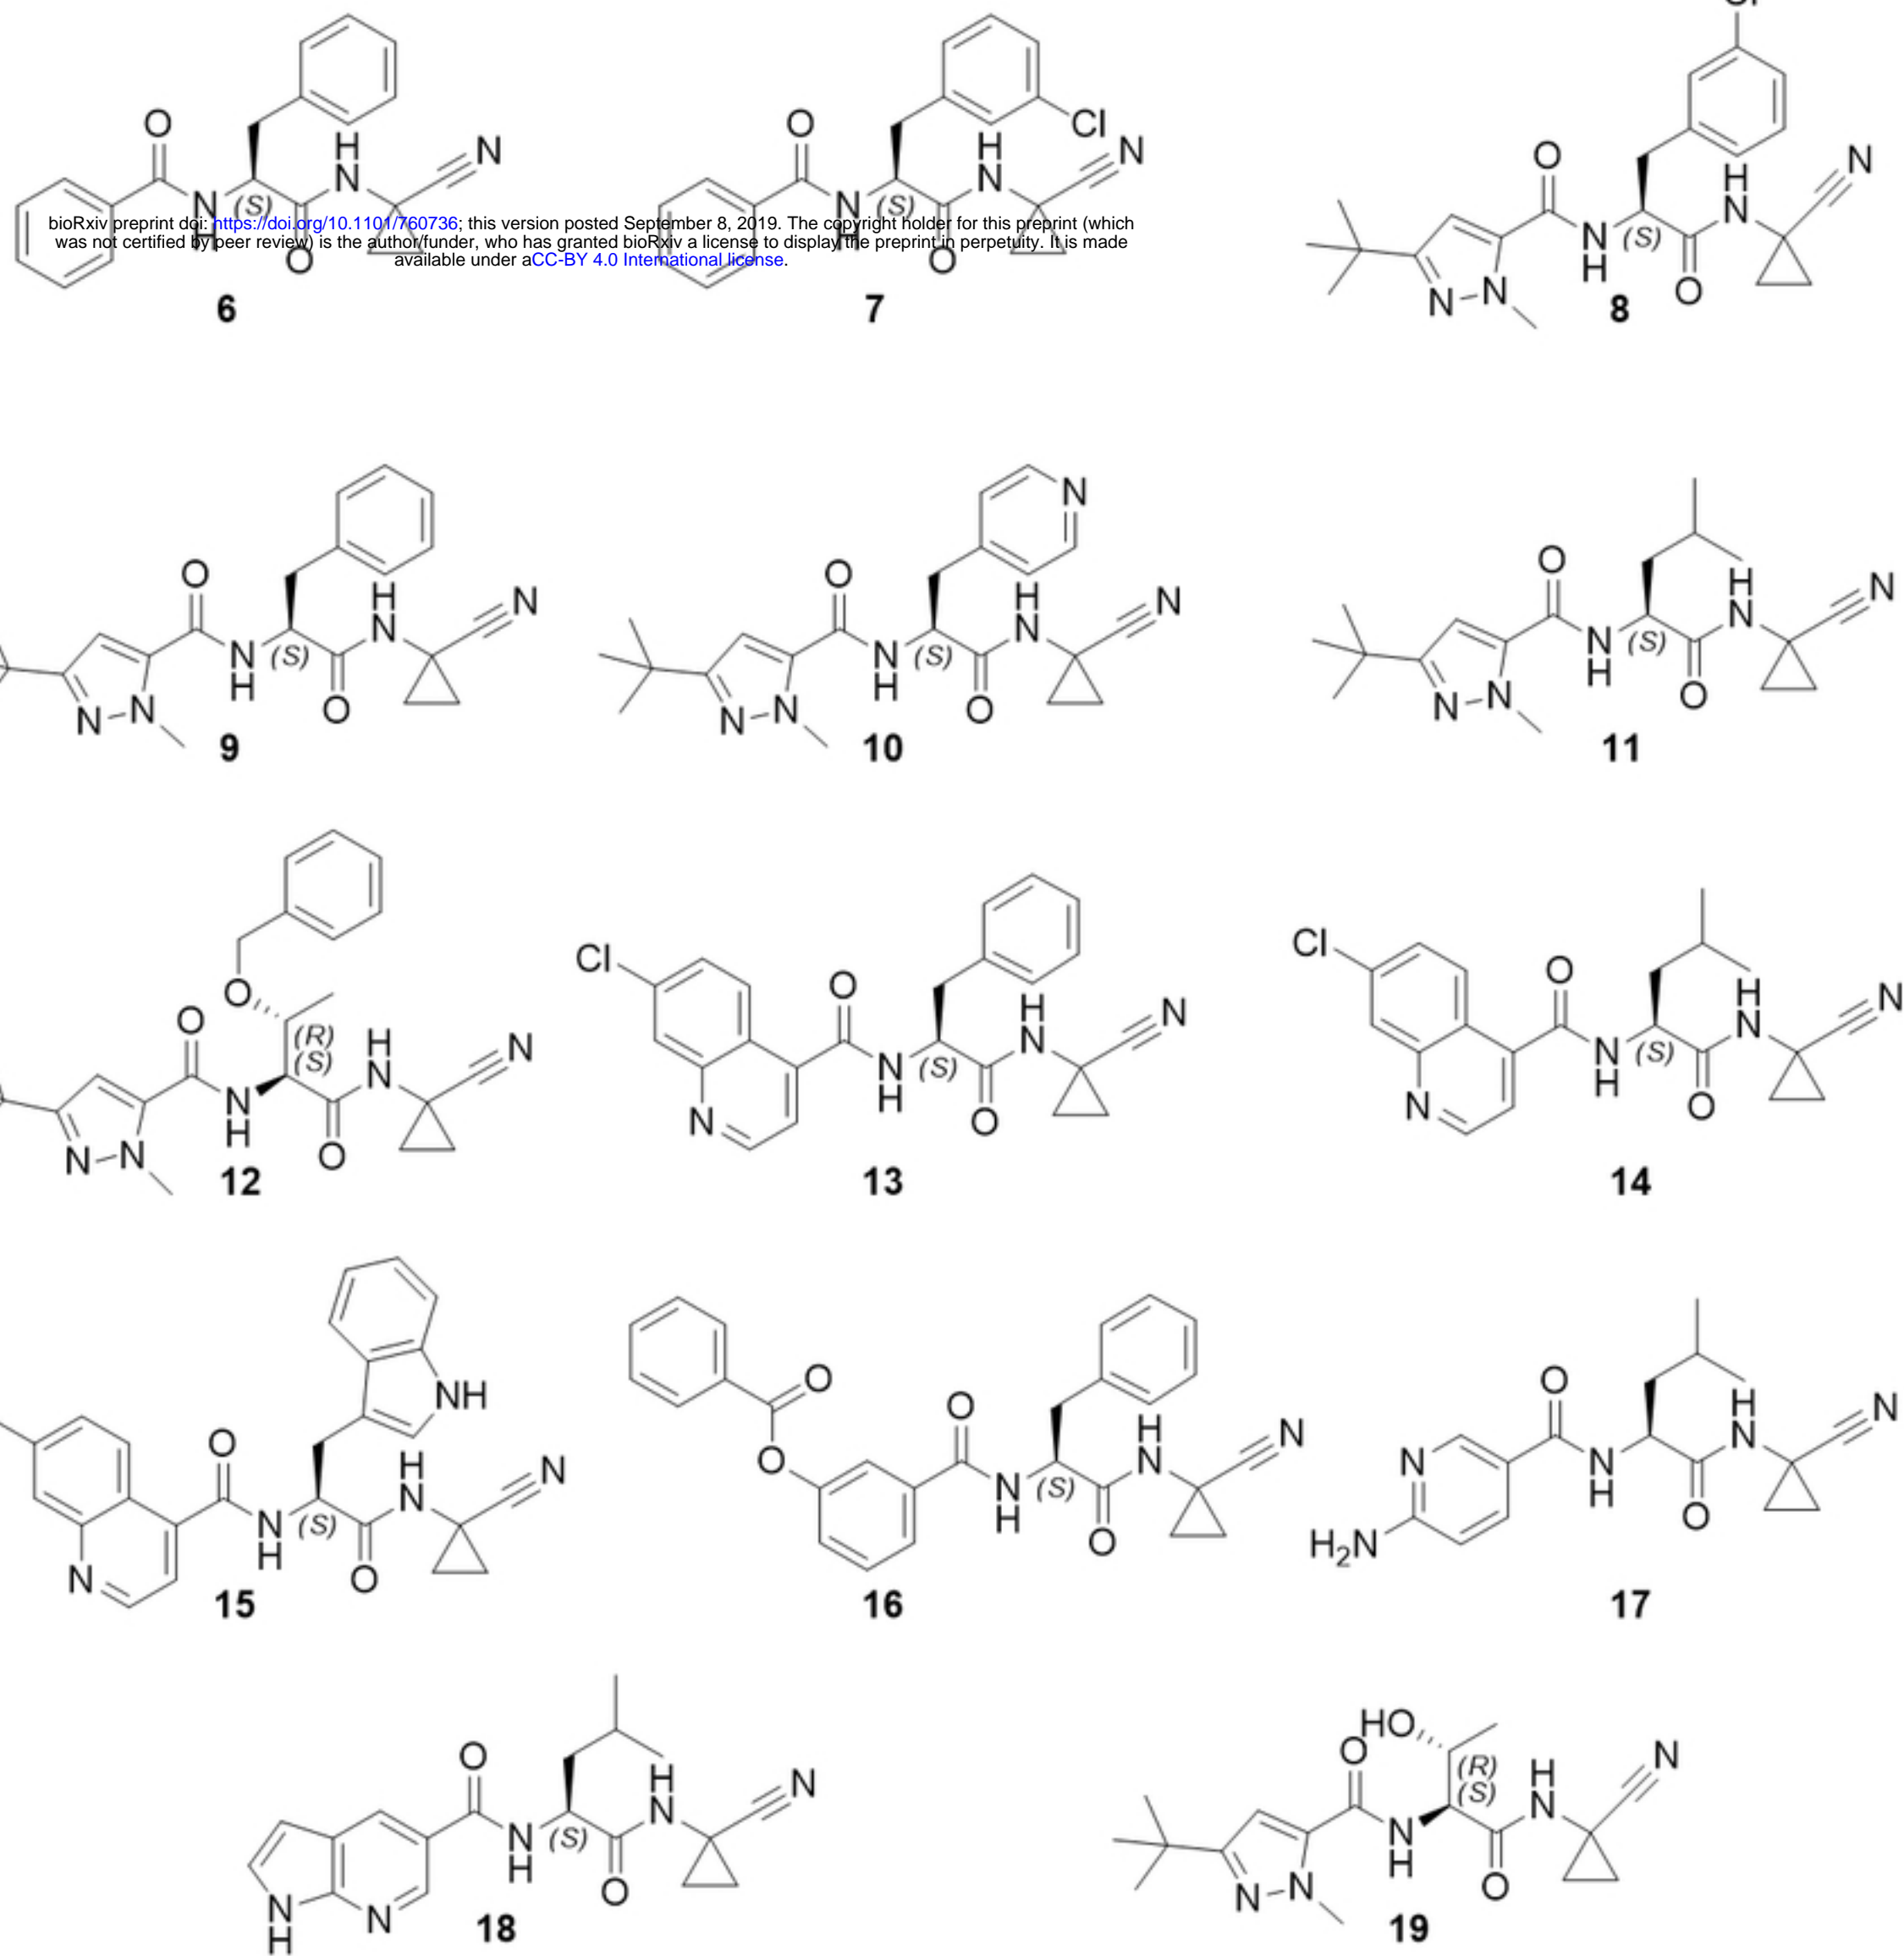

Figure 5

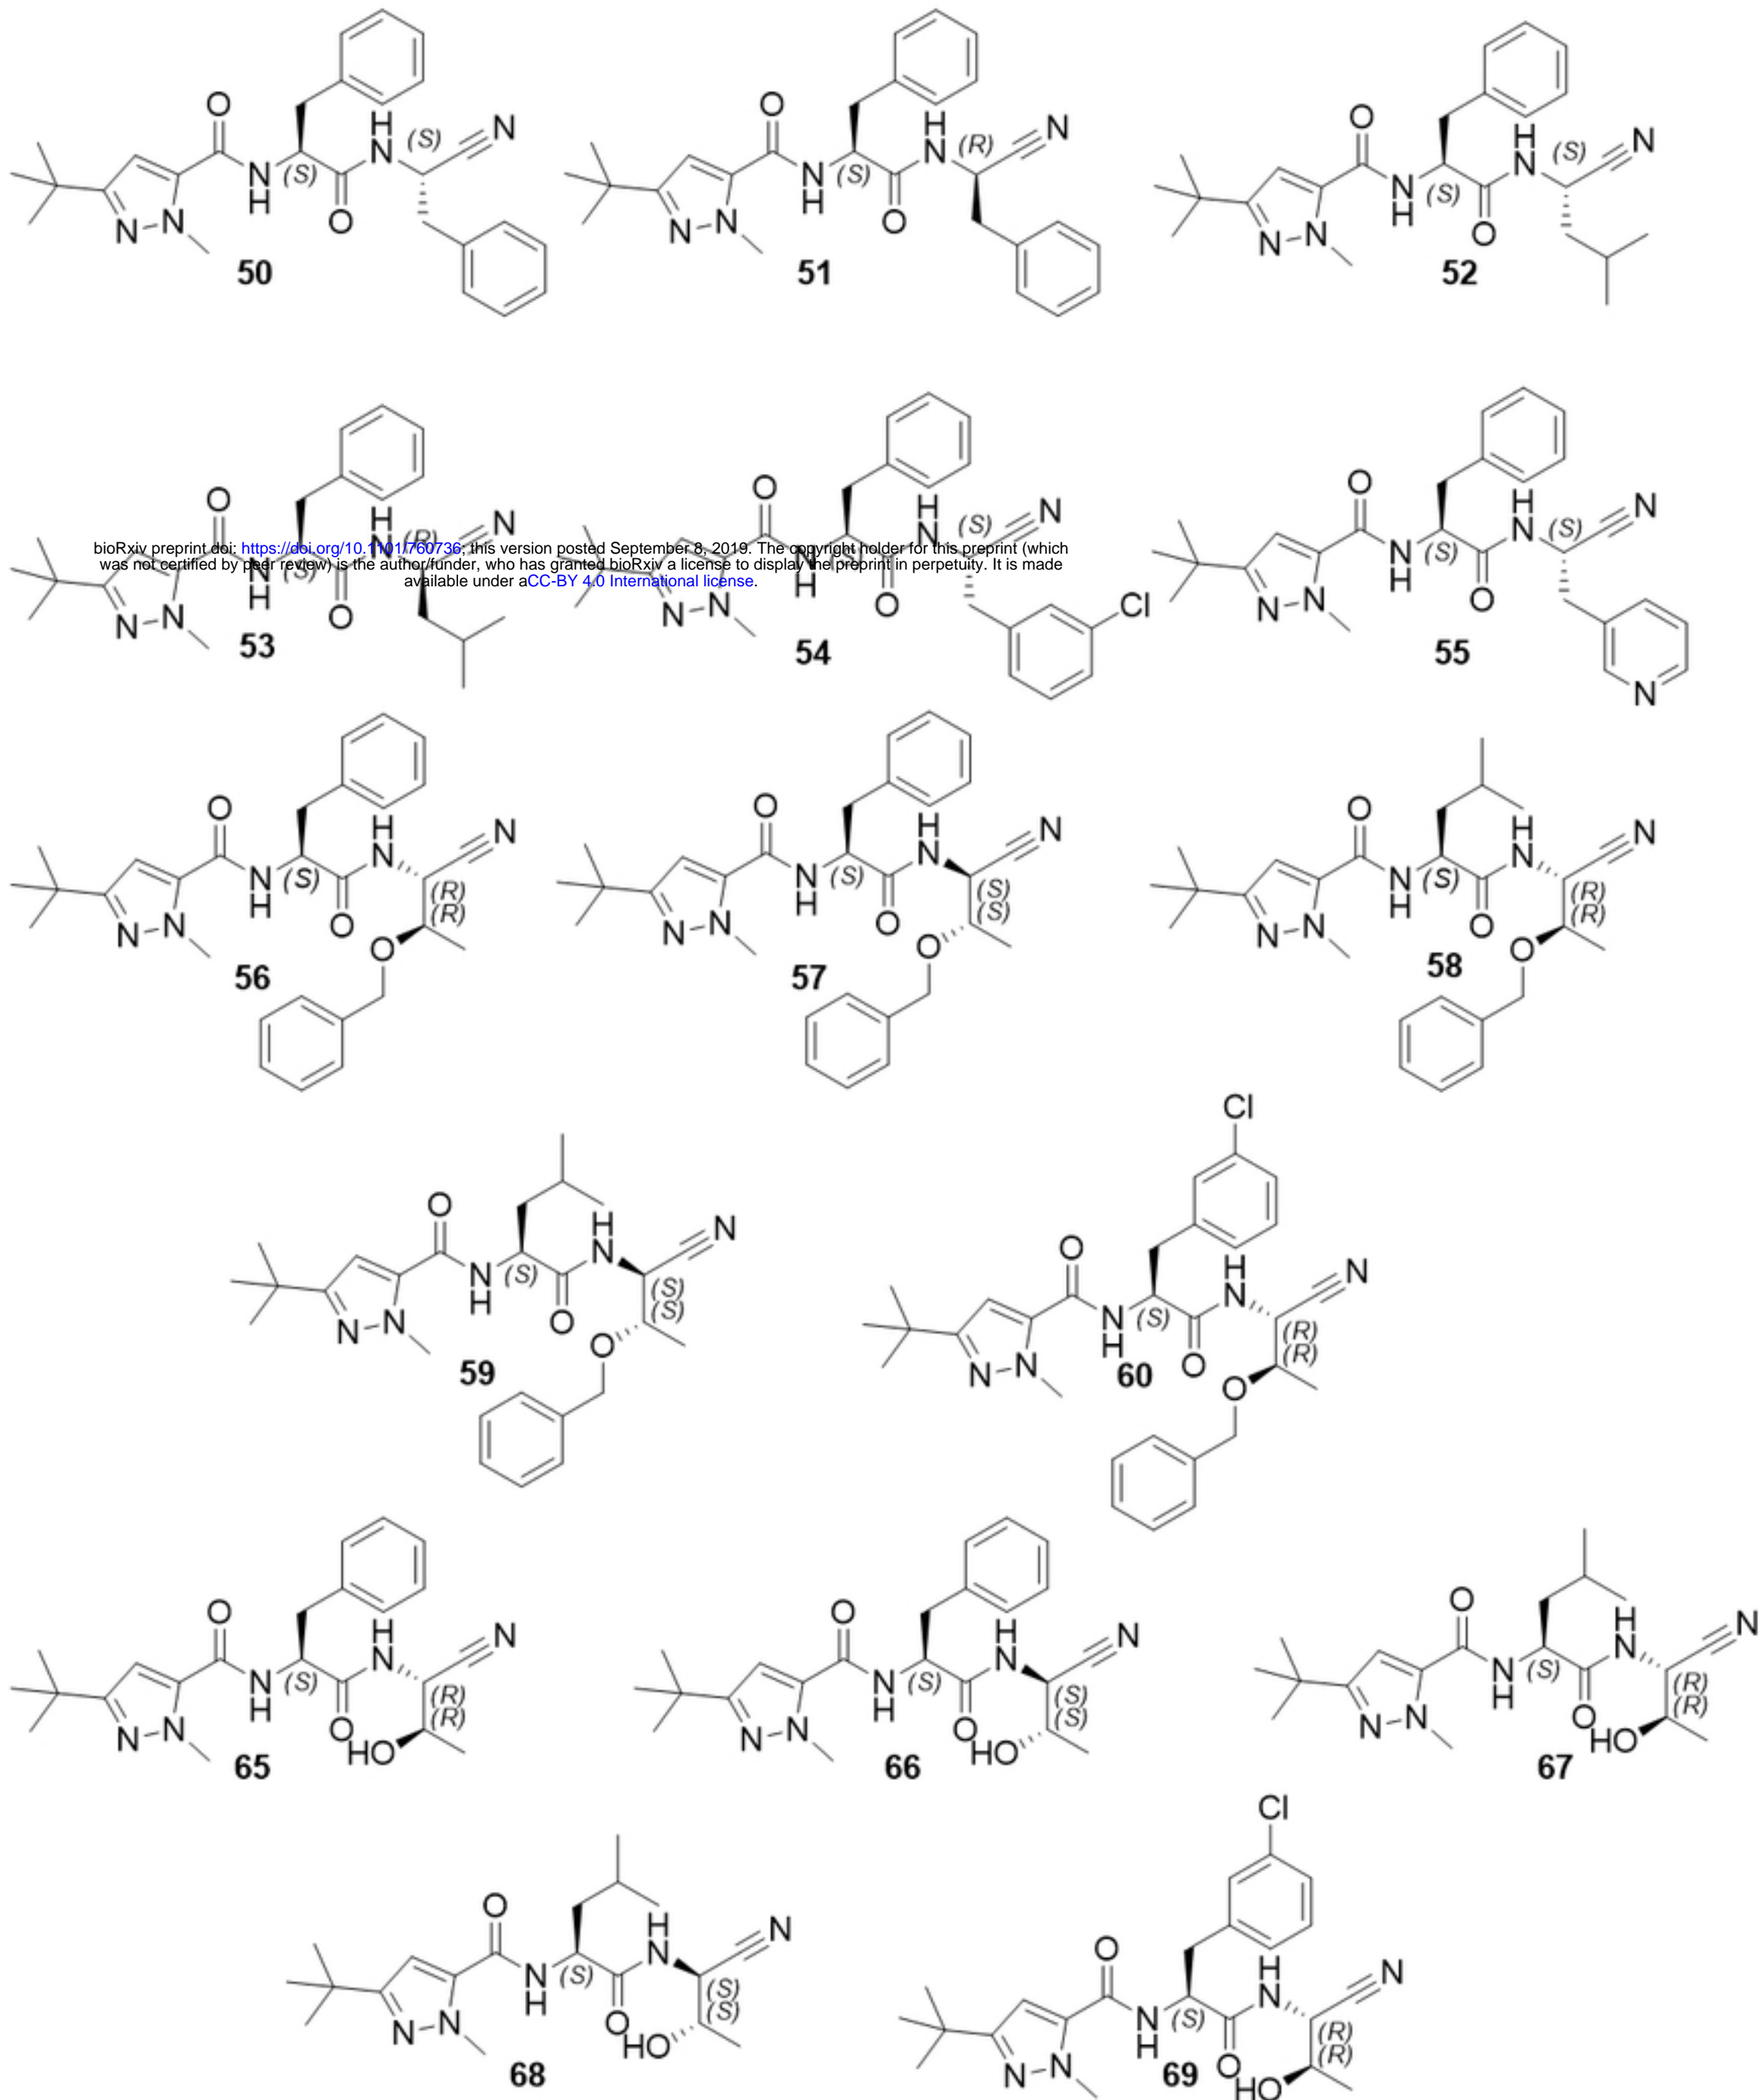

Figure 6

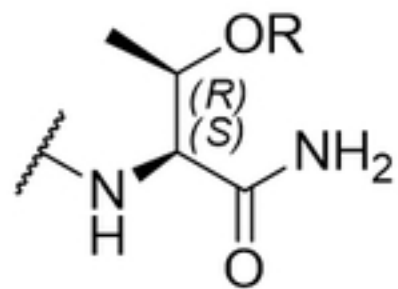

Dehydration

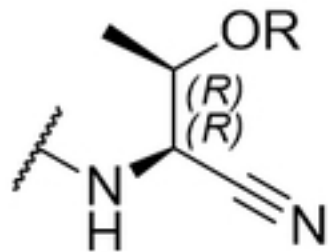

Enzyme inhibition

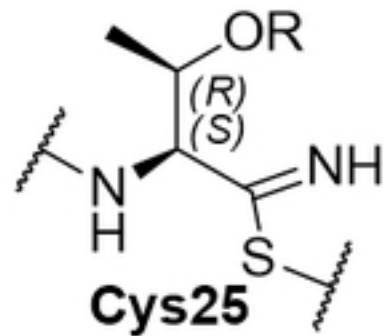

R = -H; -CH<sub>2</sub>C<sub>6</sub>H<sub>5</sub>

Figure 7

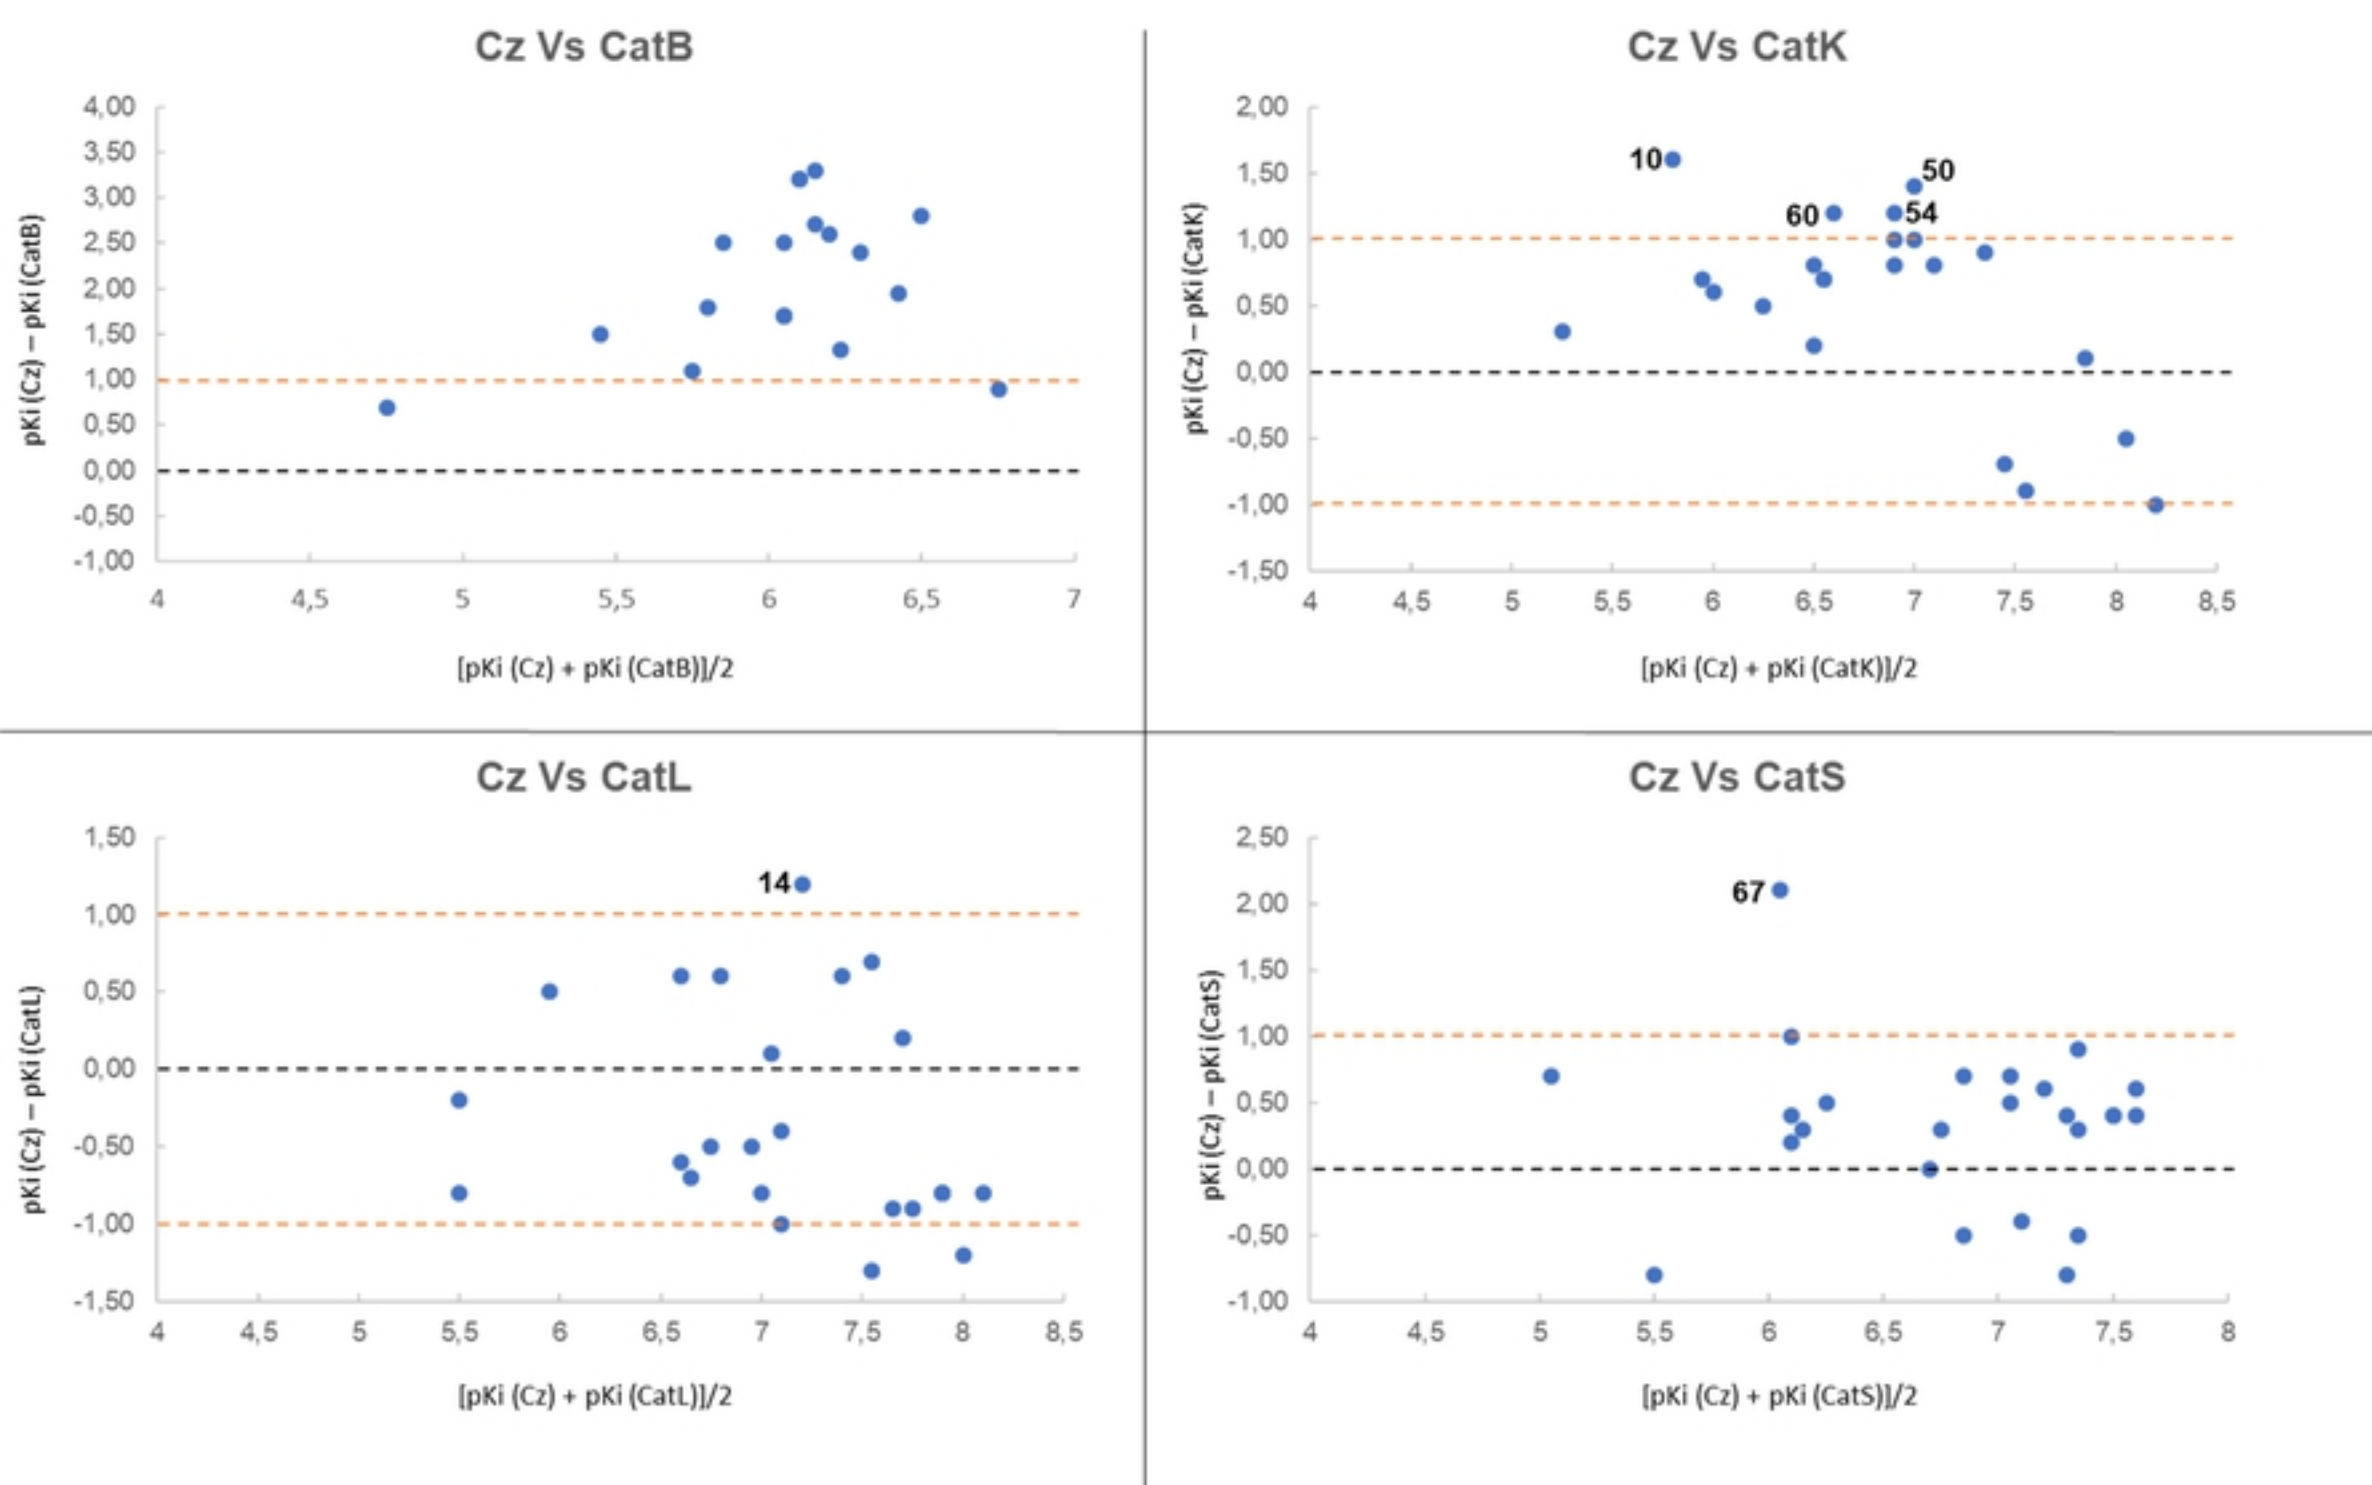

Figure 11

EC<sub>50</sub> = 71.8  
CC<sub>50</sub> > 100  
TPSA = 99.8  
ilogP = 3.2  
Ali\_LogS = -4.8  
pK<sub>i</sub> = 7.3

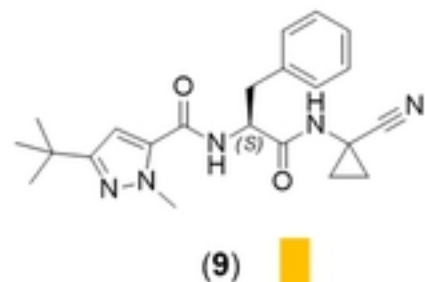

P2

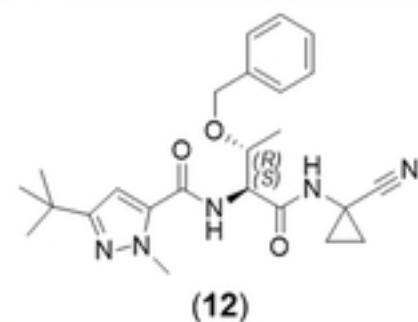

EC<sub>50</sub> = 32.7  
CC<sub>50</sub> > 100  
TPSA = 109.4  
ilogP = 3.6  
Ali\_LogS = -4.8  
pK<sub>i</sub> = 5.1

P1

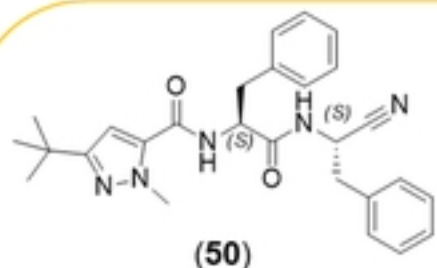

EC<sub>50</sub> = 63.5  
CC<sub>50</sub> = 83.1  
TPSA = 99.8  
ilogP = 3.7  
Ali\_LogS = -6.5  
pK<sub>i</sub> = 7.7

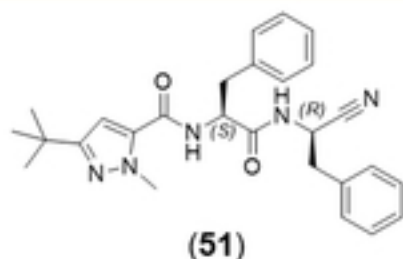

EC<sub>50</sub> = 8.6  
CC<sub>50</sub> = 42.3  
TPSA = 99.8  
ilogP = 3.0  
Ali\_LogS = -6.5  
pK<sub>i</sub> = 6.3

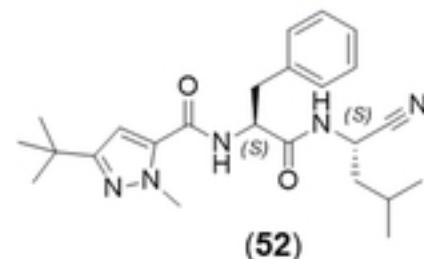

EC<sub>50</sub> = 4.1  
CC<sub>50</sub> = 97.9  
TPSA = 99.8  
ilogP = 2.3  
Ali\_LogS = -6.2  
pK<sub>i</sub> = 7.5

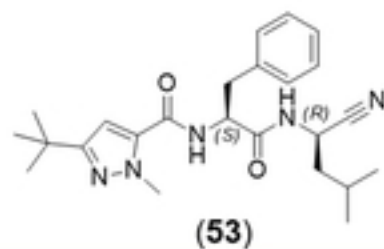

EC<sub>50</sub> = 26.0  
CC<sub>50</sub> > 100  
TPSA = 99.8  
ilogP = 4.2  
Ali\_LogS = -6.2  
pK<sub>i</sub> = 6.5

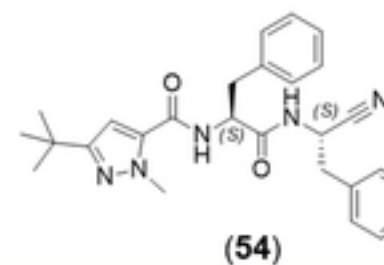

EC<sub>50</sub> = 15.8  
CC<sub>50</sub> = 44.7  
TPSA = 99.8  
ilogP = 3.7  
Ali\_LogS = -7.1  
pK<sub>i</sub> = 7.5

Figure 12

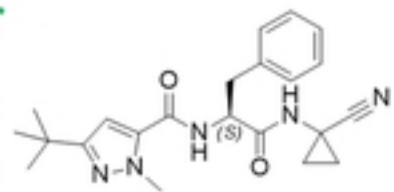

$EC_{50} = 71.8$   
 $CC_{50} > 100$   
 $TPSA = 99.8$   
 $i\log P = 3.2$   
 $Ali\_LogS = -4.8$   
 $pK_i = 7.3$

(9)

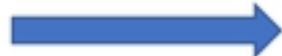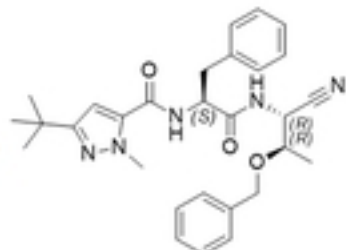

$EC_{50} > 100$   
 $CC_{50} > 100$   
 $TPSA = 109.4$   
 $i\log P = 3.6$   
 $Ali\_LogS = -6.5$   
 $pK_i = 6.3$

(56)

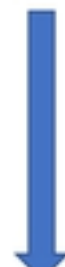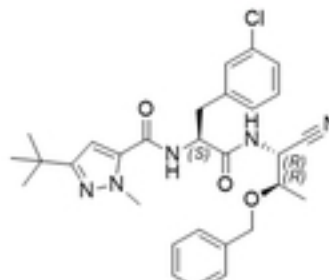

$EC_{50} = 4.9$   
 $CC_{50} > 100$   
 $TPSA = 109.4$   
 $i\log P = 4.1$   
 $Ali\_LogS = -7.1$   
 $pK_i = 7.2$

(60)

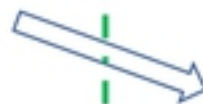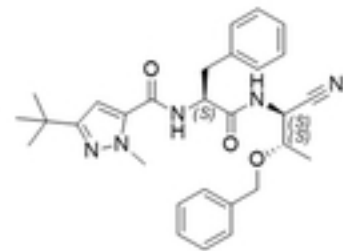

$EC_{50} = 4.3$   
 $CC_{50} > 100$   
 $TPSA = 109.4$   
 $i\log P = 4.1$   
 $Ali\_LogS = -6.5$   
 $pK_i = 75\%$

(57)

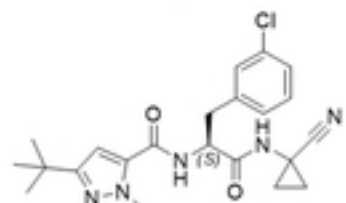

$EC_{50} > 100$   
 $CC_{50} > 100$   
 $TPSA = 99.8$   
 $i\log P = 3.5$   
 $Ali\_LogS = -5.4$   
 $pK_i = 7.4$

(8)

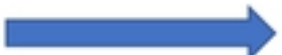

Figure 13



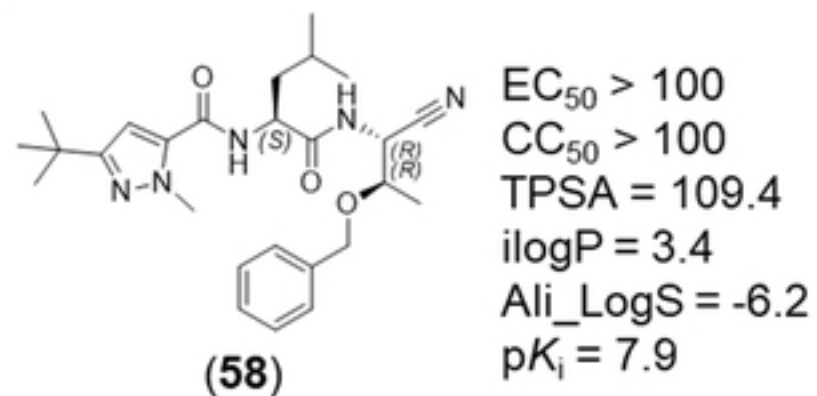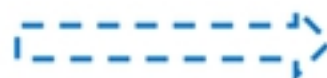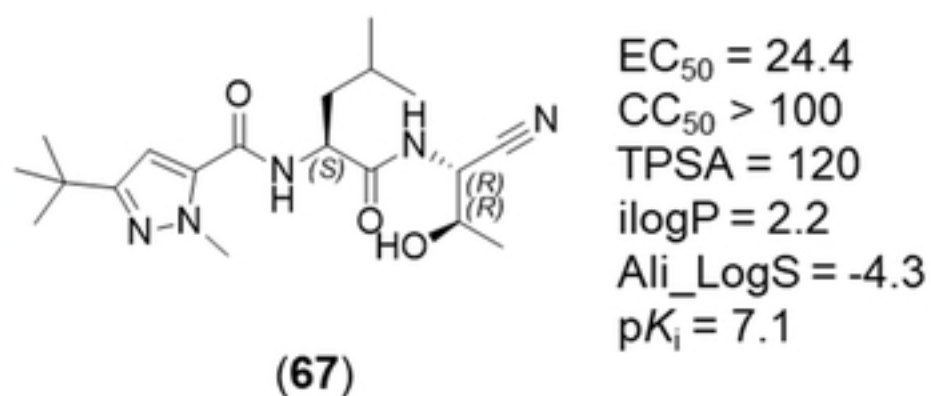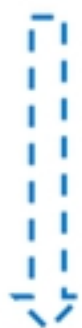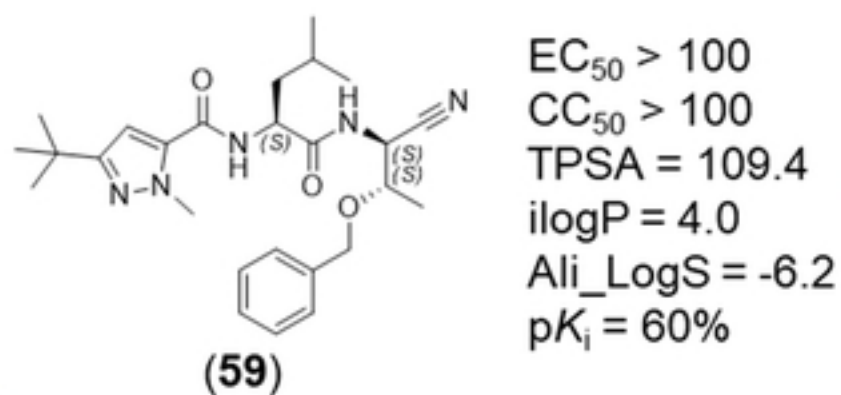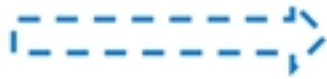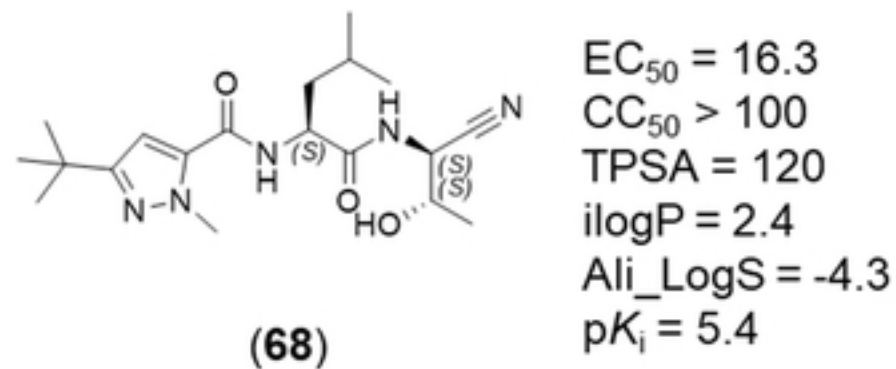

Figure 14

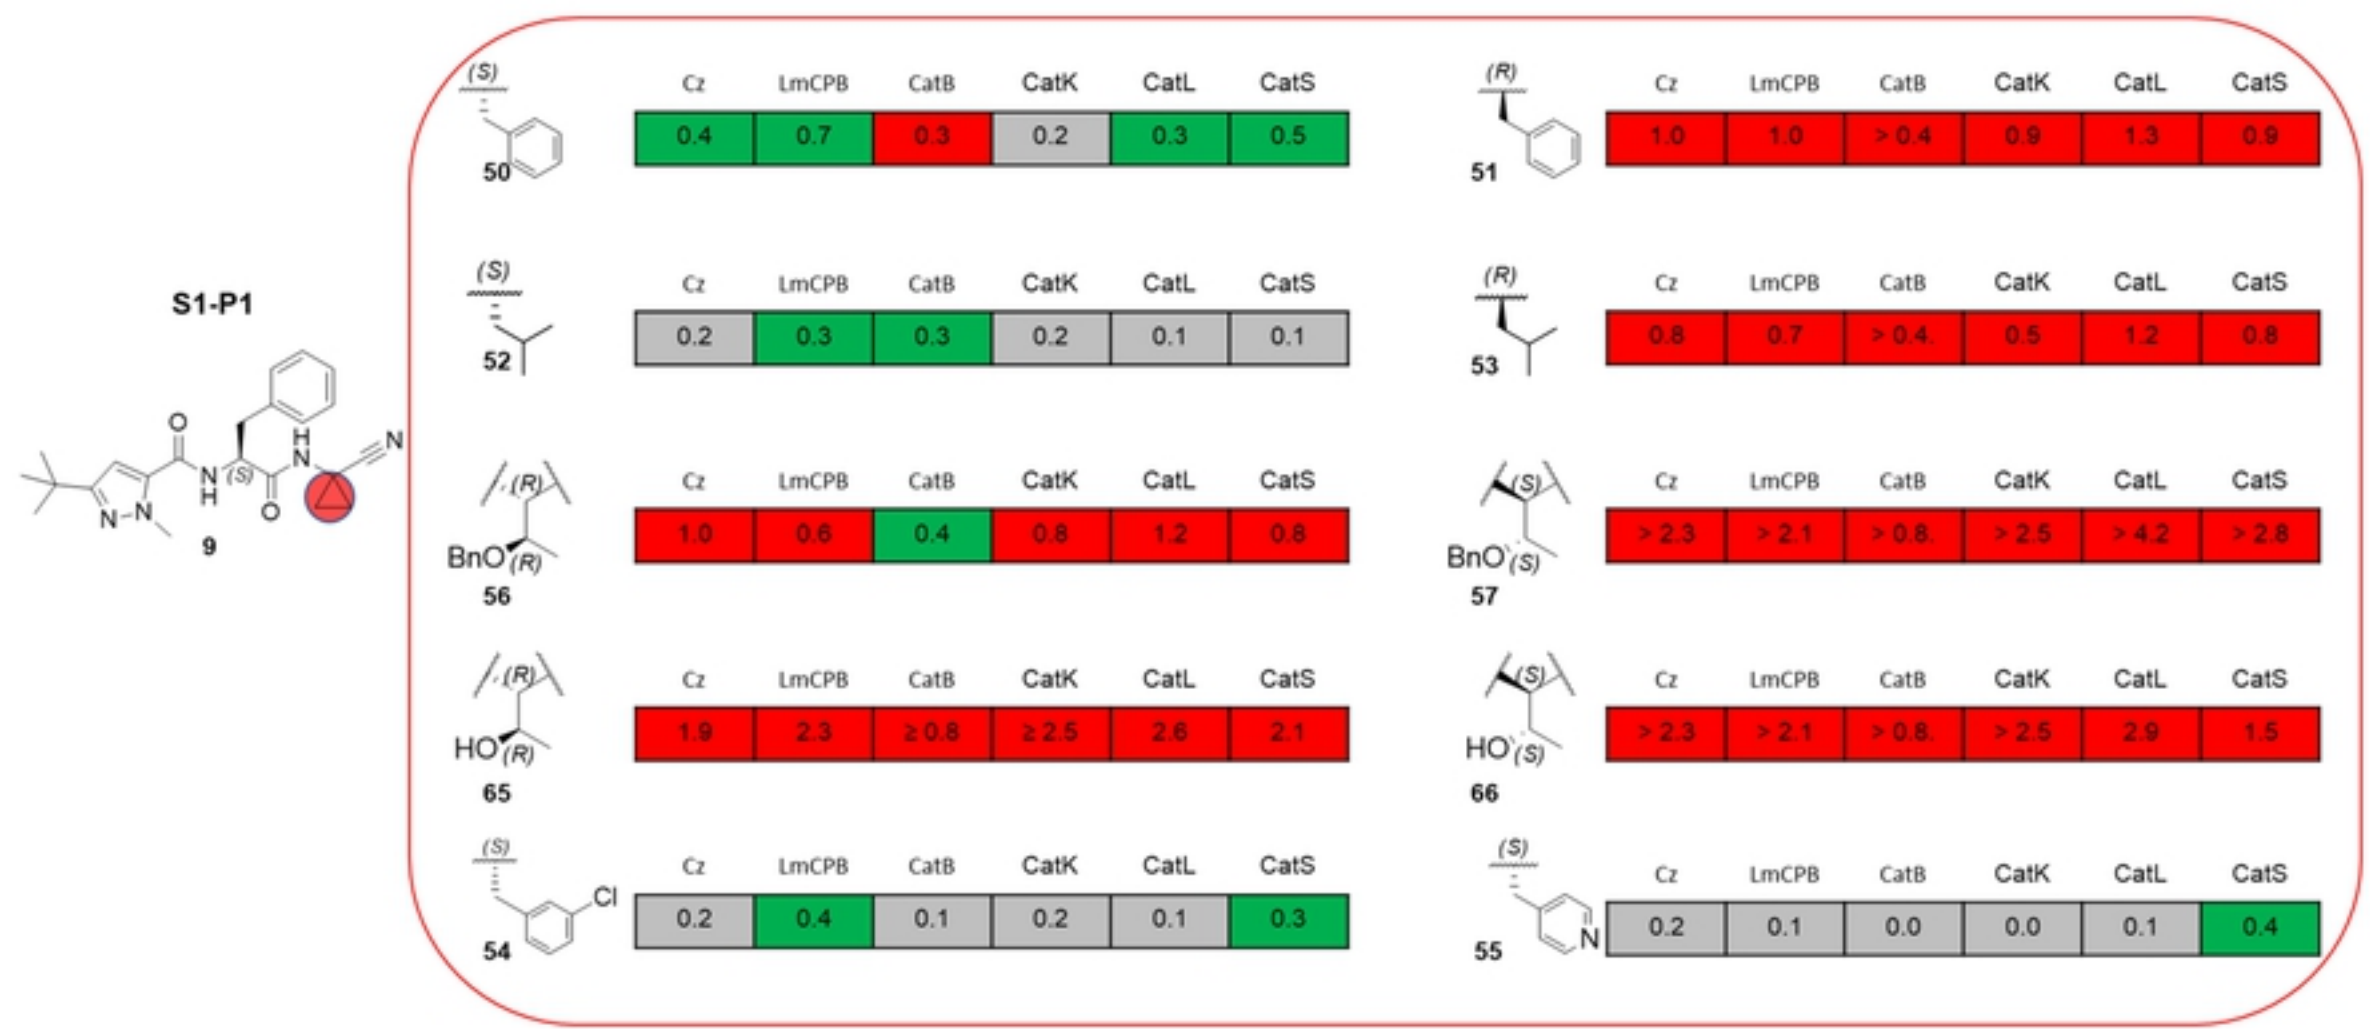

Figure 8

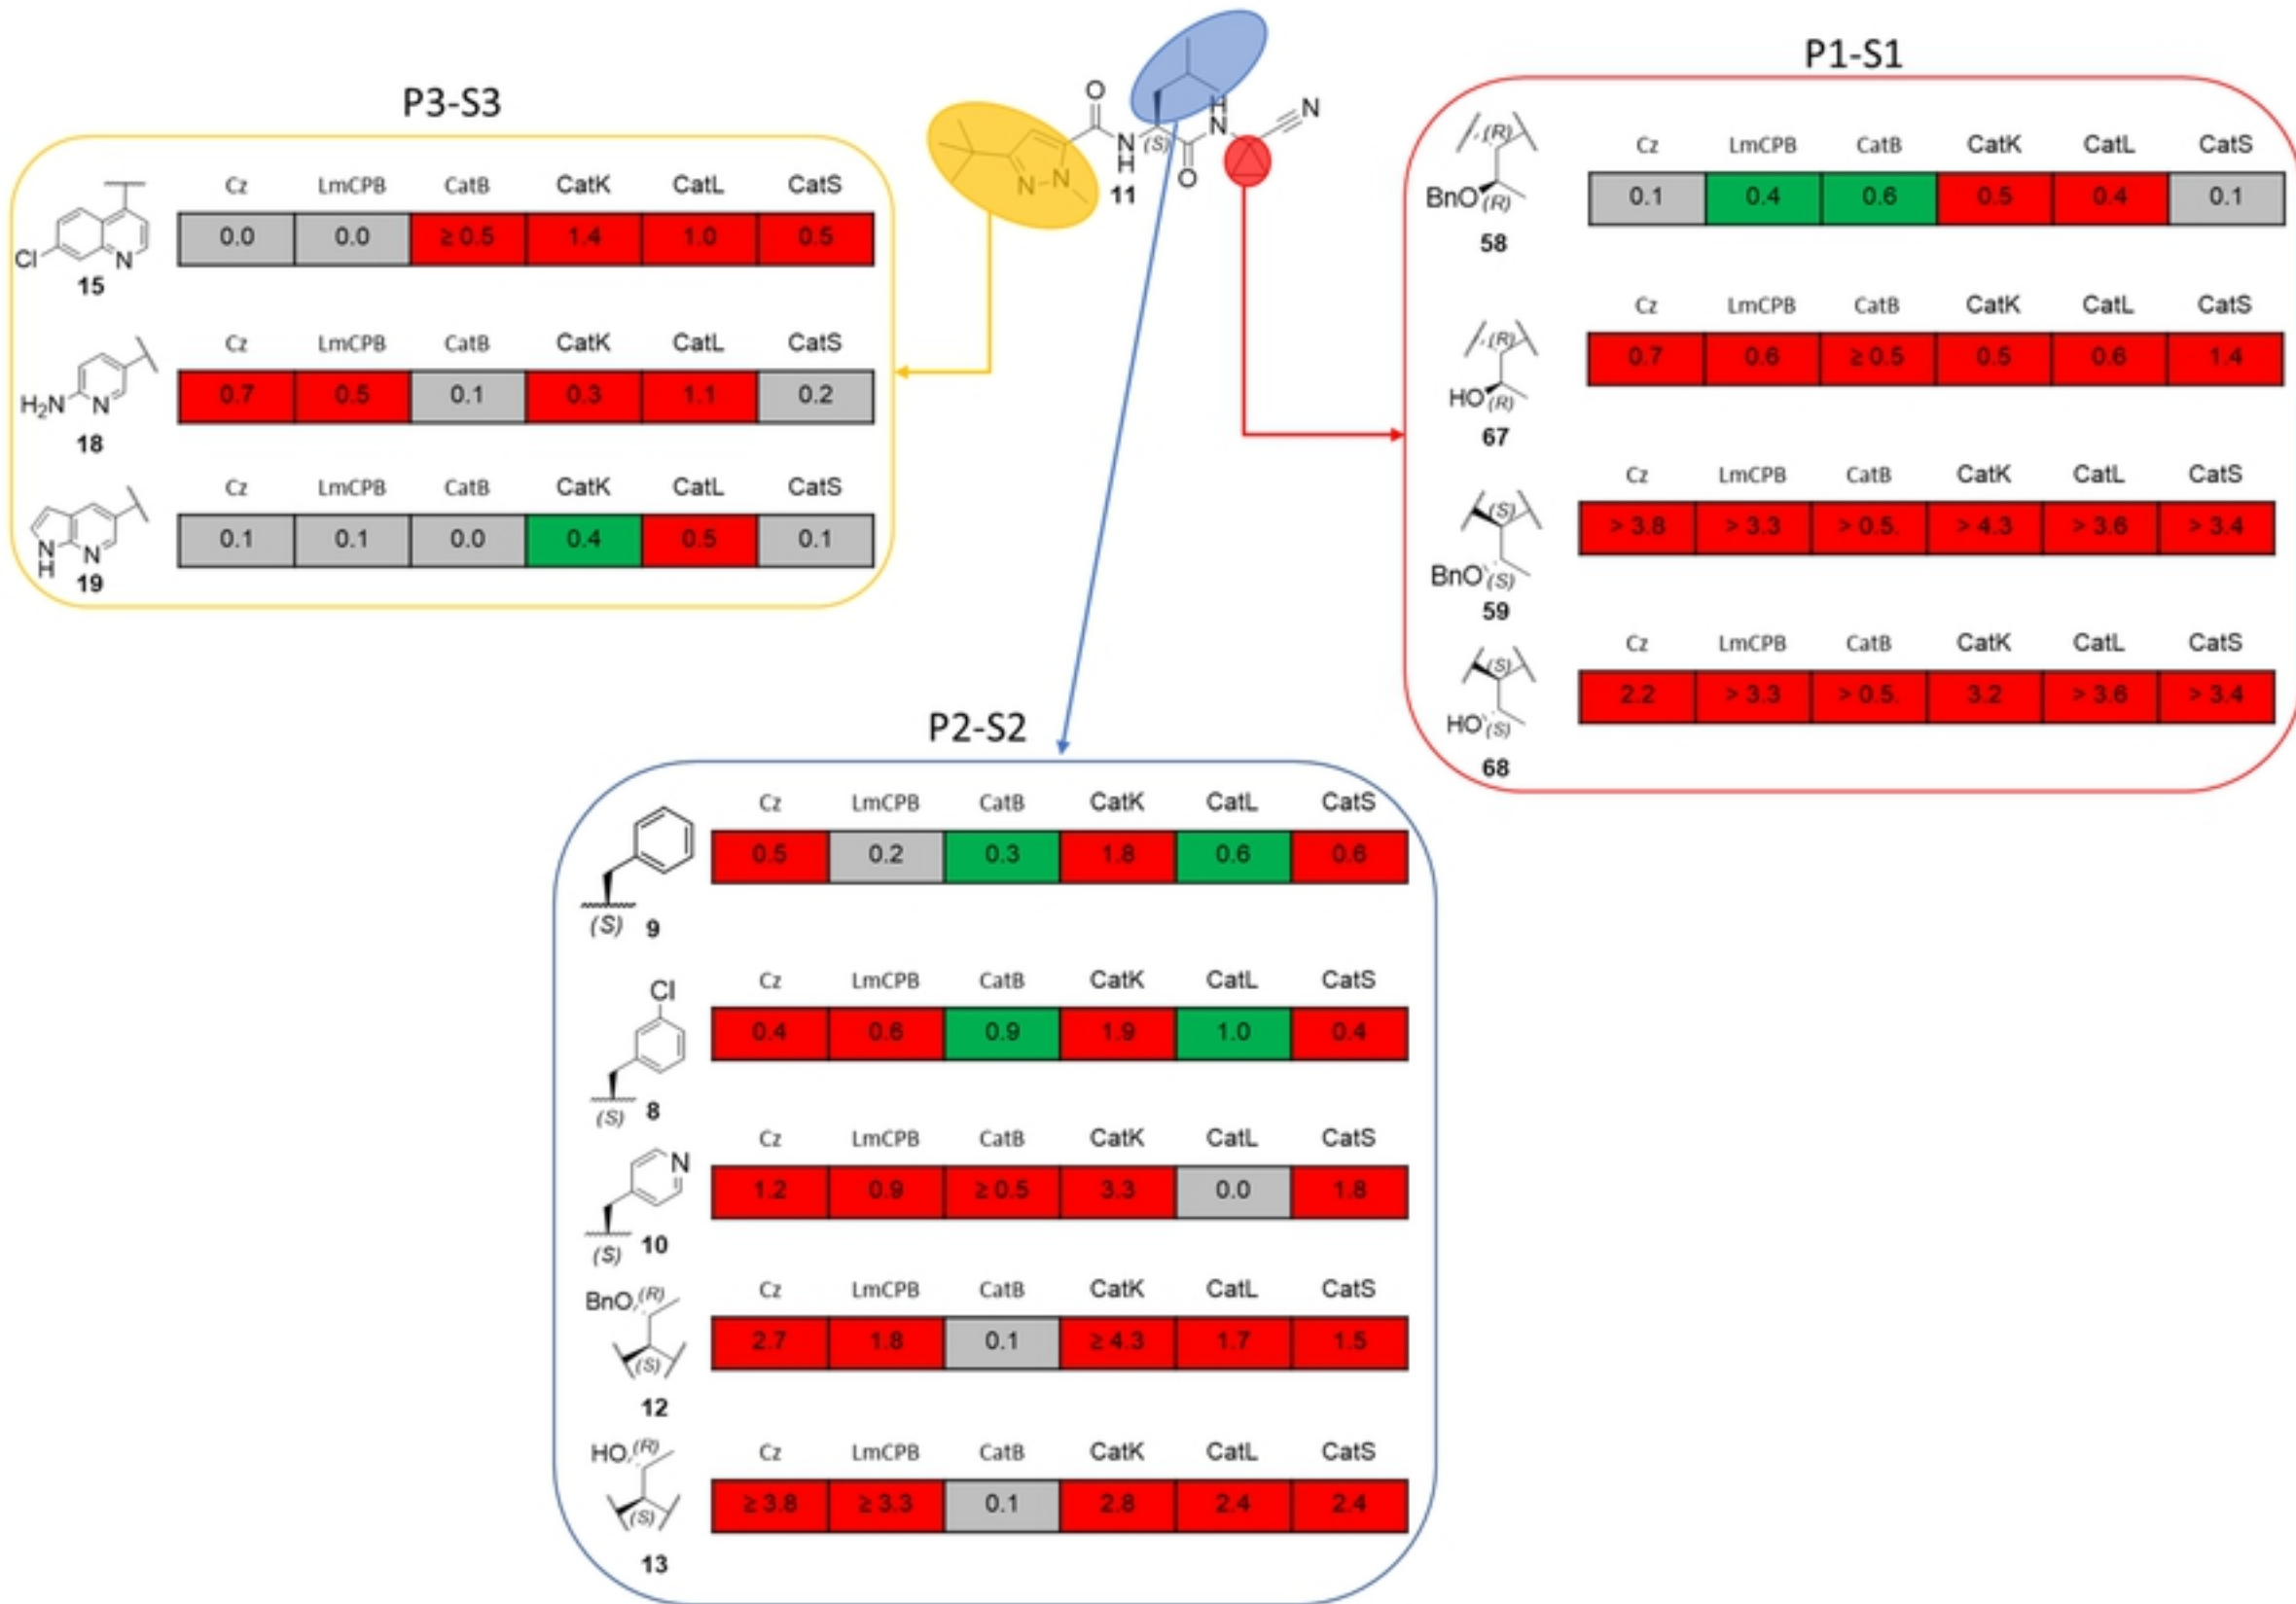

Figure 9

### A

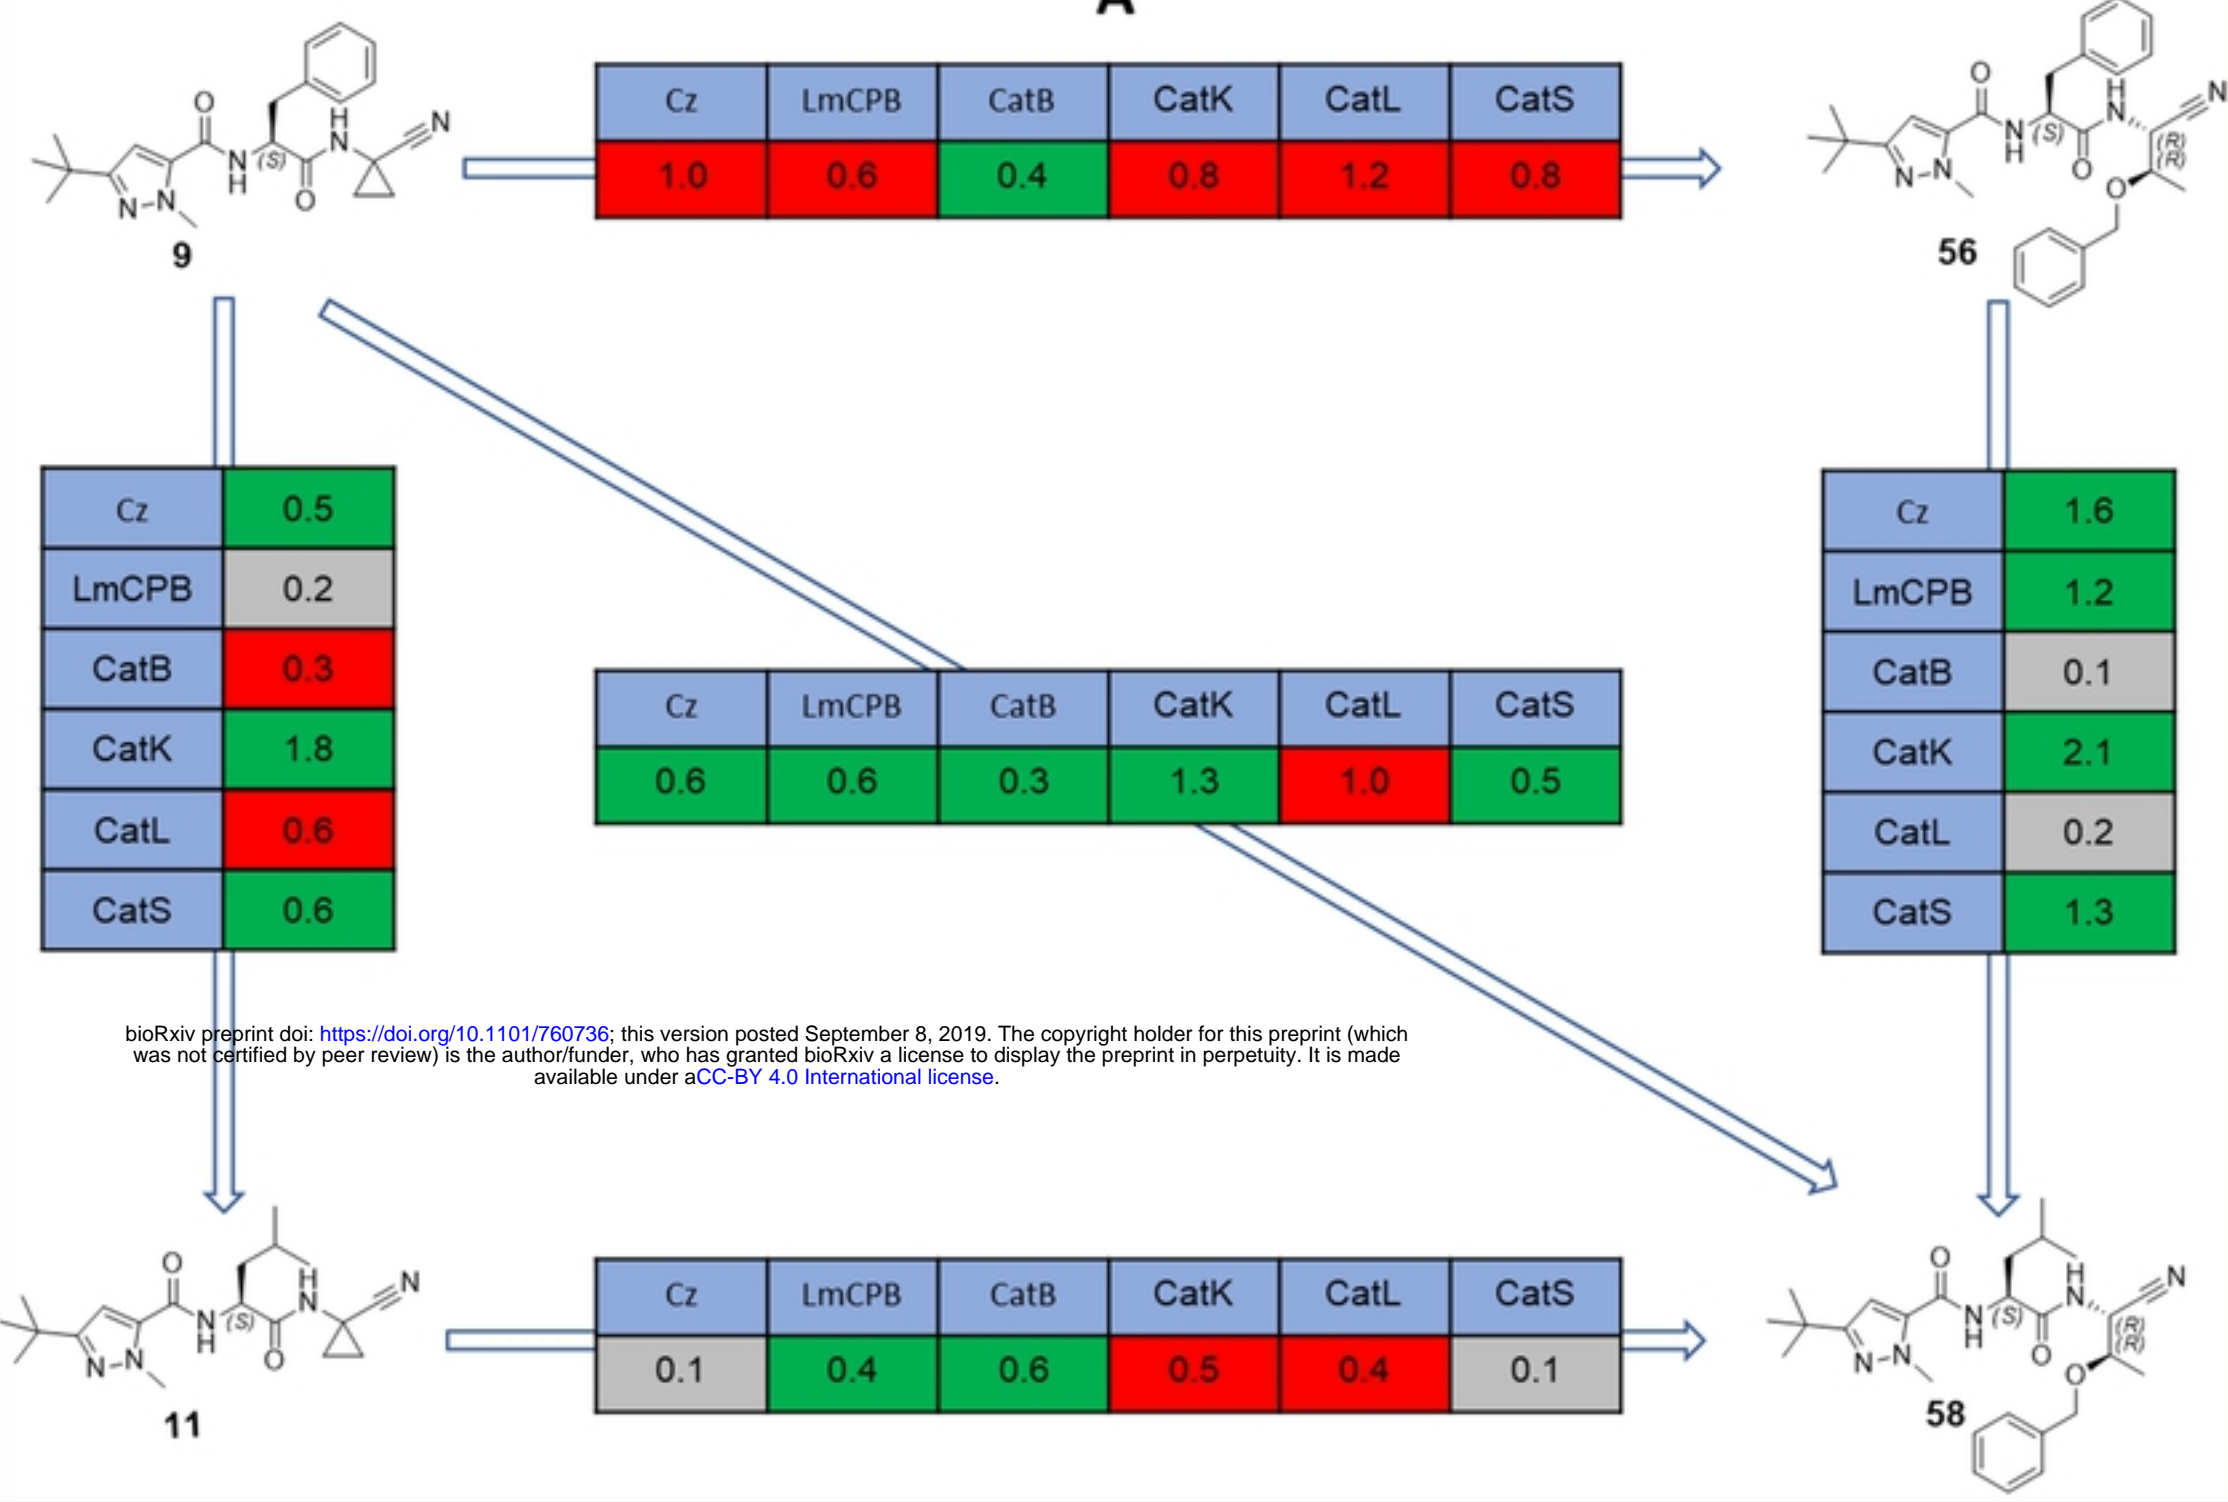

### B

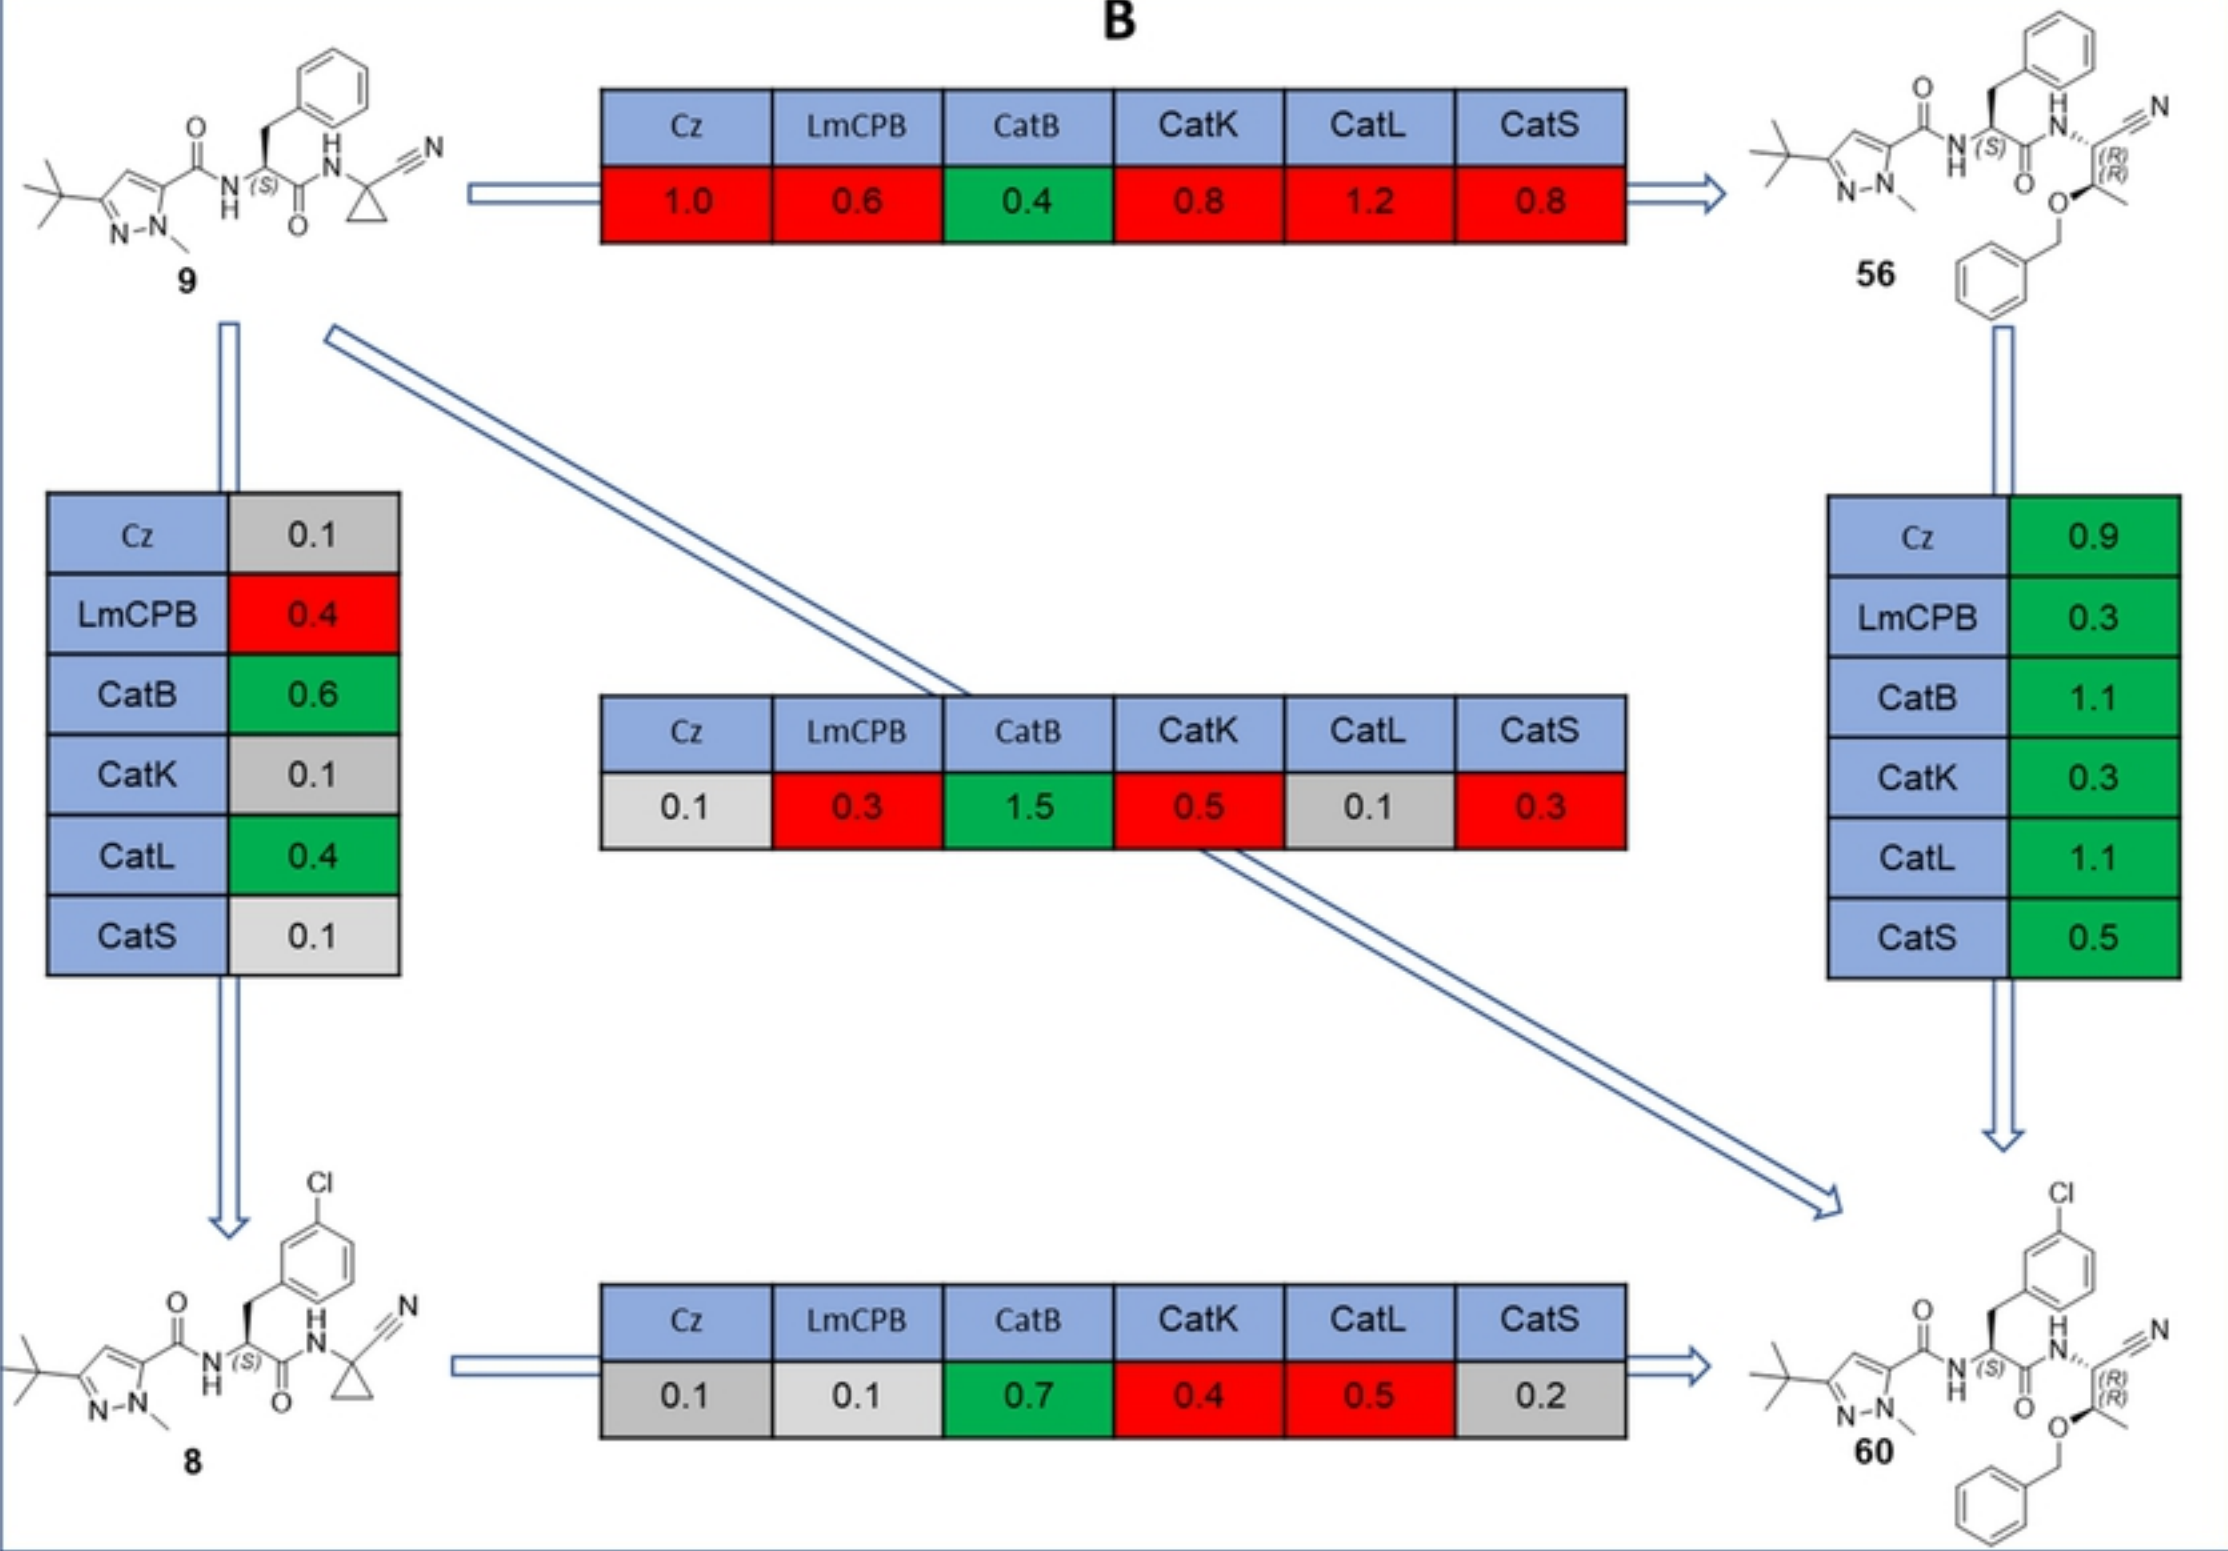

Figure 10
